# Supplementary material for: Total synthesis and target identification of marine cyclopiane diterpenes
Source: PubMed Central journal article supplement — Nat Commun. 2024 Dec 30;15:10851. doi: 10.1038/s41467-024-55189-8 (PMC11686375; doi:10.1038/s41467-024-55189-8), 2024-12-30
Supplement: 41467_2024_55189_MOESM1_ESM.pdf [file 41467_2024_55189_MOESM1_ESM.pdf]

## Supplementary Information

# Total Synthesis and Target Identification of Marine Cyclopiane Diterpenes

Tian Li<sup>1,#</sup>, Shan Jiang<sup>2,#</sup>, Yuanhao Dai<sup>1,#</sup>, Xia Wu<sup>2,#</sup>, Huihui Guo<sup>1</sup>, Liang Shi<sup>1</sup>, Xueli Sang<sup>1</sup>, Li Ren<sup>1</sup>, Jie Wang<sup>2</sup>, Lili Shi<sup>3</sup>, Wenming Zhou<sup>1\*</sup>, Houhua Li<sup>2\*</sup>, & Hong-Dong Hao<sup>1,3\*</sup>

<sup>1</sup>Shaanxi Key Laboratory of Natural Products & Chemical Biology, College of Chemistry & Pharmacy, Northwest A&F University, Yangling, Shaanxi 712100, China

<sup>2</sup>State Key Laboratory of Natural and Biomimetic Drugs, Chemical Biology Center, School of Pharmaceutical Sciences, Peking University, Xue Yuan Road No. 38, Beijing 100191, China

<sup>3</sup>State Key Laboratory of Chemical Oncogenomics, Peking University Shenzhen Graduate School, Shenzhen 518055, China

<sup>#</sup>These authors contributed equally to this work.

\*E-mail: hongdonghao@nwafu.edu.cn; lihouhua@pku.edu.cn and zhouwenming2008@nwafu.edu.cn

### Table of Contents

|                                                                    |     |
|--------------------------------------------------------------------|-----|
| 1. Comparison of natural and synthetic Cyclopiane diterpenes.....  | S2  |
| 2. Experimental Procedures.....                                    | S15 |
| 3.1 Total Synthesis of 12 $\beta$ -hydroxy Conidiogenone C.....    | S15 |
| 3.2 Total Synthesis of Conidiogenones C and K.....                 | S29 |
| 3.3 Stereocontrolled cyclopentenone construction.....              | S34 |
| 3.4 Preparation of Conidiogenone C Probe <b>51</b> .....           | S38 |
| 4. Supplementary figures and tables for target identification..... | S39 |
| 5. Chiral HPLC Spectra of Wieland-Miescher ketone.....             | S46 |
| 6. Crystallographic Data.....                                      | S47 |
| 7. <sup>1</sup> H and <sup>13</sup> C NMR Spectra.....             | S49 |
| 8. References.....                                                 | S81 |

## 2. Comparison of natural and synthetic Cyclopiane diterpenes

**Table S1. Comparison of natural and synthetic 12 $\beta$ -hydroxy Conidiogenone C (9) ( $[\alpha]_D^{20}$ )**

| $[\alpha]_D^T$         |                                              |
|------------------------|----------------------------------------------|
| Natural <sup>[1]</sup> | $[\alpha]_D^{25} = -0.22$ ( $c = 1$ , MeOH)  |
| Synthetic              | $[\alpha]_D^{20} = -6.0$ ( $c = 0.5$ , MeOH) |

**Table S2. Comparison of natural and synthetic 12 $\beta$ -hydroxy Conidiogenone C (9)**

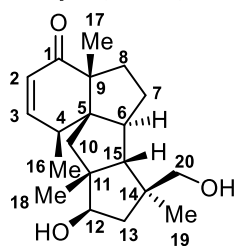

**12 $\beta$ -hydroxy conidiogenone C**

| No. | <sup>1</sup> H NMR (CD <sub>3</sub> OD)     |                                           | <sup>13</sup> C NMR (CD <sub>3</sub> OD) |                                    |                      |
|-----|---------------------------------------------|-------------------------------------------|------------------------------------------|------------------------------------|----------------------|
|     | Our sample<br>(500 Hz)                      | Natural <sup>[1]</sup><br>(400 Hz)        | Our<br>sample<br>(125 Hz)                | Natural <sup>[1]</sup><br>(100 Hz) | Different<br>(Δ ppm) |
| 1   |                                             |                                           | 208.0                                    | 208.2                              | -0.2                 |
| 2   | 5.95 (d, <i>J</i> = 10.0 Hz,<br>1H)         | 5.97 (d, <i>J</i> = 10.0 Hz)              | 127.9                                    | 127.9                              | 0                    |
| 3   | 7.08 (dd, <i>J</i> = 9.9, 5.3<br>Hz, 1H)    | 7.11 (dd, <i>J</i> = 10.0, 5.5<br>Hz, 1H) | 157.1                                    | 157.1                              | 0                    |
| 4   | 2.82 (p, <i>J</i> = 6.2 Hz, 1H)             | 2.84 (p, <i>J</i> = 7.0 Hz, 1<br>H)       | 40.1                                     | 40.1                               | 0                    |
| 5   |                                             |                                           | 62.1                                     | 62.1                               | 0                    |
| 6   | 2.42 – 2.39 (m, 1H)                         | 2.43, (m, 1 H)                            | 55.4                                     | 55.4                               | 0                    |
| 7   | 1.64 – 1.59 (m, 2H);<br>1.29 – 1.28 (m, 1H) | 1.63, (m, 1 H); 1.29,<br>(m, 1 H)         | 35.0                                     | 35.0                               | 0                    |
| 8   | 2.09 – 2.05 (m, 1H);<br>1.77 – 1.71 (m, 2H) | 2.09, (m, 1 H); 1.76,<br>(m, 1H)          | 39.8                                     | 39.8                               | 0                    |
| 9   |                                             |                                           | 58.8                                     | 58.7                               | 0.1                  |
| 10  | 2.22 (d, <i>J</i> = 14.9 Hz,<br>1H)         | 2.24 (d, <i>J</i> = 14.8 Hz, 1<br>H)      | 43.1                                     | 43.1                               | 0                    |
| 11  |                                             |                                           | 57.0                                     | 57.0                               | 0                    |
| 12  | 4.11 (dd, <i>J</i> = 10.5, 7.1<br>Hz, 1H)   | 4.14 (d, <i>J</i> = 11.0, 6.9<br>Hz, 1H)  | 77.7                                     | 77.7                               | 0                    |
| 13  | 1.77 – 1.71 (m, 2H);<br>1.64 – 1.59 (m, 2H) | 1.76, (m, 1 H); 1.63,<br>(m, 1H)          | 45.3                                     | 45.3                               | 0                    |
| 14  |                                             |                                           | 42.3                                     | 42.3                               | 0                    |
| 15  | 1.76 (d, <i>J</i> = 5.8 Hz, 1 H)            | 1.79 (d, <i>J</i> = 5.8 Hz, 1<br>H)       | 68.2                                     | 68.2                               | 0                    |
| 16  | 1.29 (d, <i>J</i> = 7.1 Hz, 3H)             | 1.32 (d, <i>J</i> = 7.2 Hz, 3<br>H)       | 18.7                                     | 18.7                               | 0                    |
| 17  | 1.20 (s, 3H)                                | 1.23, (s, 3 H)                            | 21.5                                     | 21.5                               | 0                    |
| 18  | 1.07 (s, 3H)                                | 1.10, (s, 3 H)                            | 22.7                                     | 22.7                               | 0                    |
| 19  | 0.99 (s, 3H),                               | 1.01, (s, 3 H)                            | 24.5                                     | 24.5                               | 0                    |
| 20  | 3.31– 3.25 (m, 2H)                          | 3.30, (m, 2 H)                            | 73.9                                     | 73.9                               | 0                    |
| -OH | 1.48 (d, <i>J</i> = 15.0 Hz,<br>1H)         |                                           |                                          |                                    |                      |

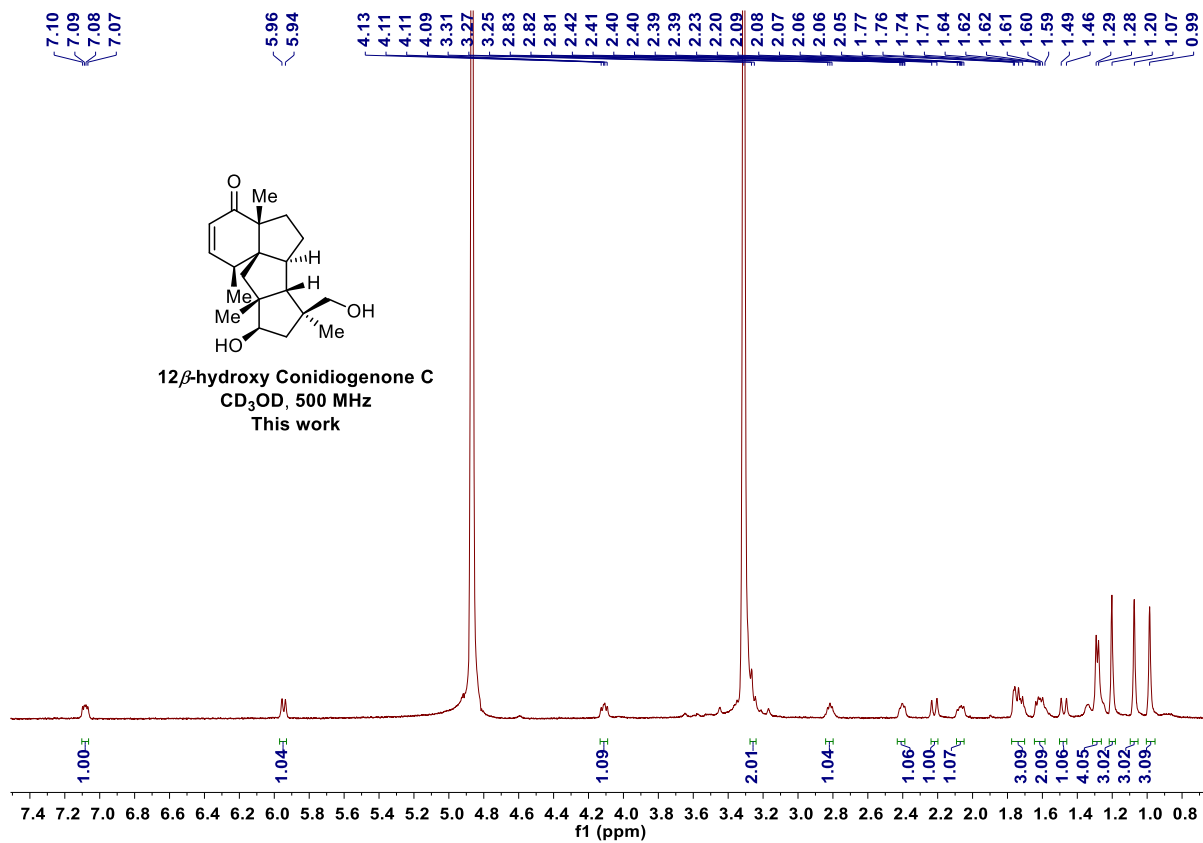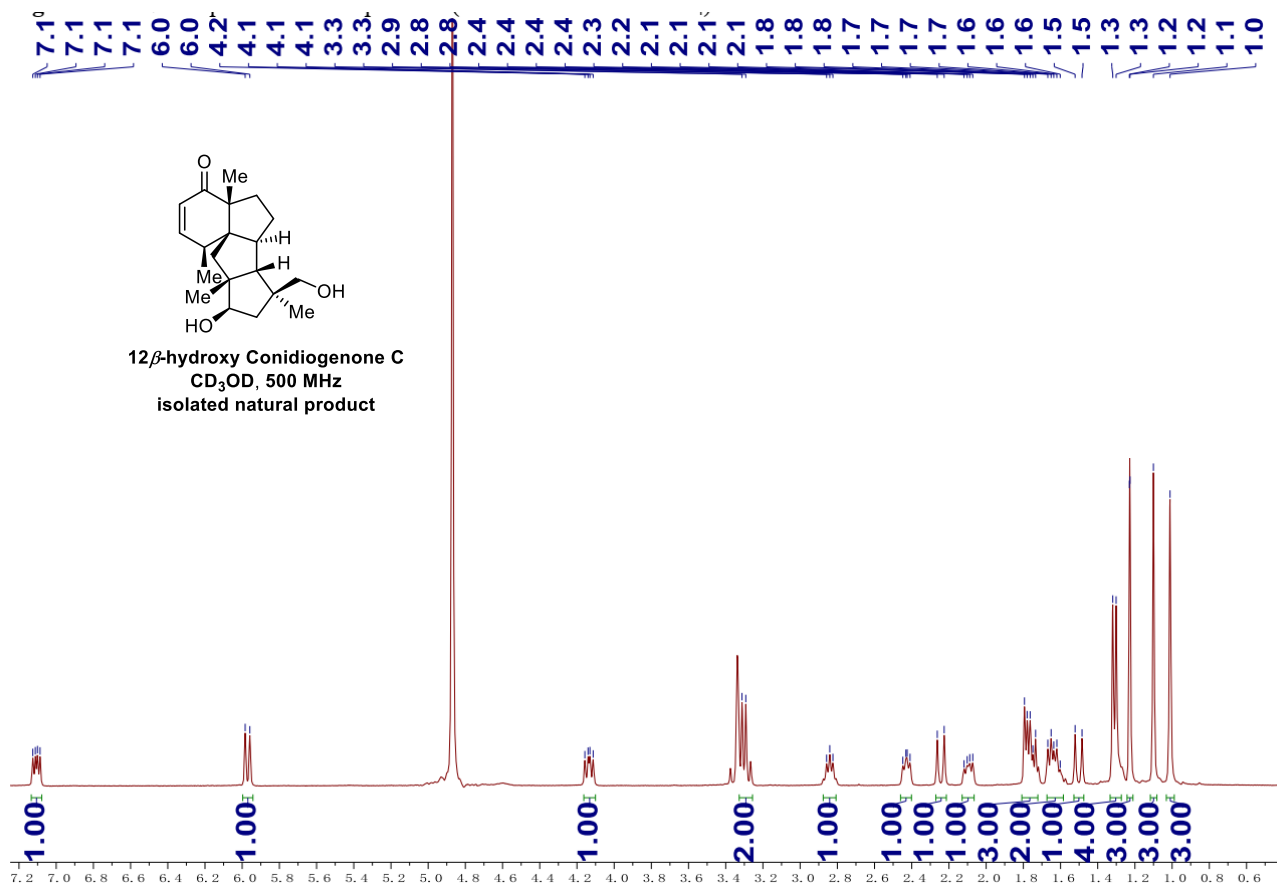



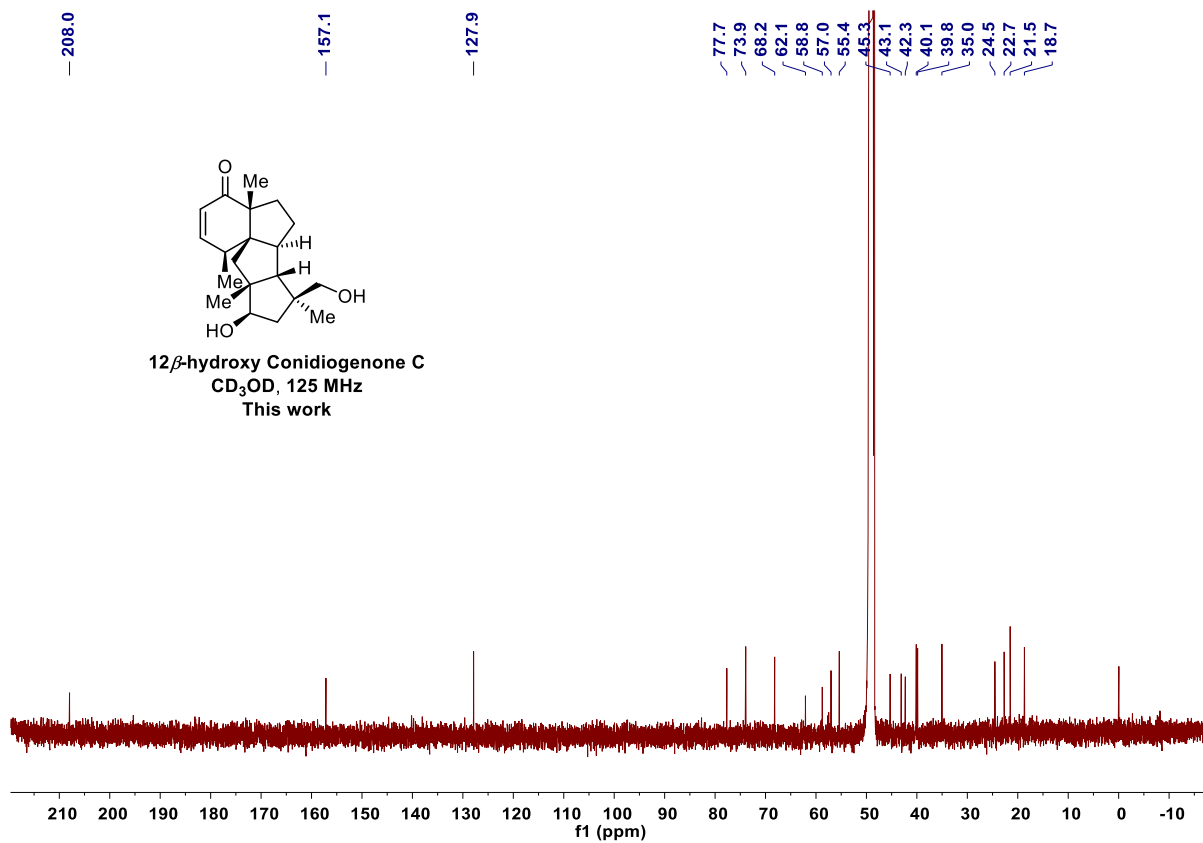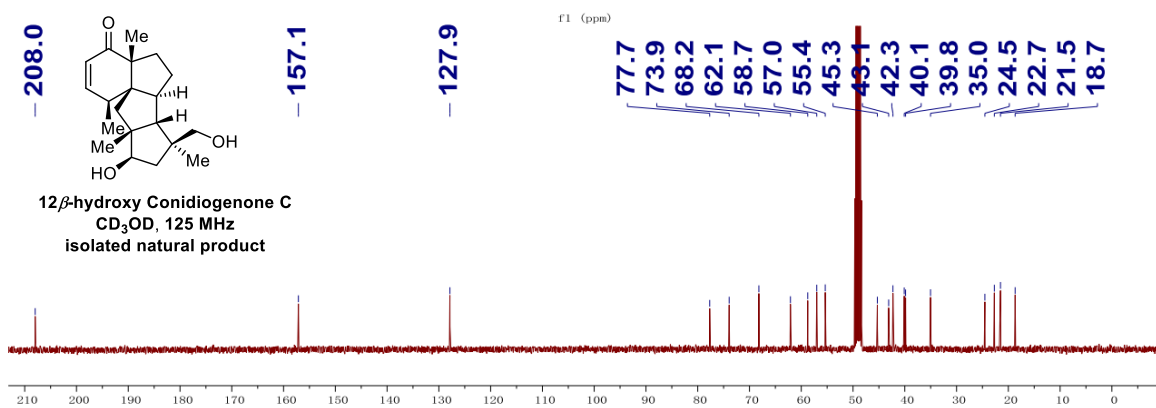

**Table S3. Comparison of natural and synthetic Conidiogenone C (4) ( $[\alpha]_D^{20}$ )**

| $[\alpha]_D^{20}$      |                                                |
|------------------------|------------------------------------------------|
| Natural <sup>[2]</sup> | $[\alpha]_D^{20} = -11.9$ ( $c = 0.04$ , MeOH) |
| Synthetic              | $[\alpha]_D^{20} = -8.6$ ( $c = 1$ , MeOH)     |

**Table S4. Comparison of natural and synthetic Conidiogenone C (4)**

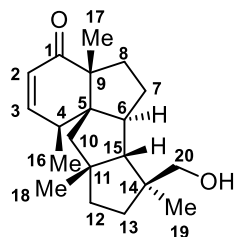

**Conidiogenone C**

| No. | Our sample (400 Hz)                | Snyder's sample <sup>[3]</sup> (500 Hz)  | Natural <sup>[2]</sup> (600 Hz)     |
|-----|------------------------------------|------------------------------------------|-------------------------------------|
| 2   | 5.97 (dd, $J = 10.0, 1.1$ Hz, 1 H) | 5.97 (dd, $J = 10.0, 1.2$ Hz, 1 H)       | 5.97 (dd, $J = 9.9, 1.1$ Hz)        |
| 3   | 6.94 (dd, $J = 10.0, 5.8$ Hz, 1 H) | 6.93 (dd, $J = 10.0, 5.8$ Hz, 1 H)       | 6.93 (dd, $J = 9.9, 6.1$ Hz)        |
| 4   | 2.69 – 2.76 (m, 1 H)               | 2.69 – 2.76, (m, 1 H)                    | 2.70 – 2.75, m                      |
| 6   | 2.30 – 2.34 (m, 1 H)               | 2.29 – 2.34, (m, 1 H)                    | 2.32 (dd, $J = 8.2, 4.9$ Hz)        |
| 7a  | 1.67 – 1.73 (m, 3 H)               | 1.65 – 1.73, (m, 3 H)                    | 1.70 – 1.73, m                      |
| 7b  | 1.20 – 1.23 (m, 1 H)               | 1.20 – 1.23, (m, 1 H)                    | 1.20 – 1.23, m                      |
| 8a  | 2.15 – 2.10 (m, 1 H)               | 2.13 (ddd, $J = 11.7, 5.5, 2.3$ Hz, 1 H) | 2.13 (ddd, $J = 11.5, 5.5, 1.7$ Hz) |
| 8b  | 1.67 – 1.73 (m, 3 H)               | 1.65 – 1.73, (m, 3 H)                    | 1.66 – 1.69, m                      |
| 10a | 2.01 (d, $J = 14.7$ Hz, 1 H)       | 2.01 (d, $J = 14.6$ Hz, 1 H)             | 2.01 (d, $J = 14.8$ Hz)             |
| 10b | 1.66 – 1.64 (m, 1 H)               | 1.64 (d, $J = 14.6$ Hz, 1 H)             | 1.64 (d, $J = 14.8$ Hz)             |
| 12a | 1.67 – 1.73 (m, 3 H)               | 1.65 – 1.73, (m, 3 H)                    | 1.65 – 1.68, m                      |
| 12b | 1.60 – 1.63 (m, 1 H)               | 1.60 – 1.63, (m, 1 H)                    | 1.60 – 1.63, m                      |
| 13a | 1.52 – 1.56 (m, 1 H)               | 1.52 – 1.56, (m, 1 H)                    | 1.52 – 1.55, m                      |
| 13b | 1.43 – 1.47 (m, 1 H)               | 1.43 – 1.47, (m, 1 H)                    | 1.43 – 1.47, m                      |
| 15  | 1.58 (d, $J = 5.0$ Hz, 1 H)        | 1.58 (d, $J = 5.1$ Hz, 1 H)              | 1.58 (d, $J = 4.9$ Hz)              |
| 16  | 1.22 (d, $J = 7.3$ Hz, 3 H)        | 1.22 (d, $J = 7.3$ Hz, 3 H)              | 1.22 (d, $J = 7.1$ Hz)              |
| 17  | 1.18 (s, 3 H)                      | 1.18 (s, 3 H)                            | 1.19, s                             |
| 18  | 1.20 (s, 3 H)                      | 1.20 (s, 3 H)                            | 1.21, s                             |
| 19  | 0.99 (s, 3 H)                      | 0.99 (s, 3 H)                            | 0.99, s                             |
| 20a | 3.41 (d, $J = 10.6$ Hz, 1 H)       | 3.41 (d, $J = 11.0$ Hz, 1 H)             | 3.41 (d, $J = 11.0$ Hz)             |
| 20b | 3.38 (d, $J = 10.7$ Hz, 1 H)       | 3.38 (d, $J = 11.0$ Hz, 1 H)             | 3.38 (d, $J = 11.0$ Hz)             |

| No. | Our sample (100 Hz) | Snyder's sample <sup>[3]</sup> (125 Hz) | Natural <sup>[2]</sup> (150 Hz) | Different ( $\Delta$ ppm) |
|-----|---------------------|-----------------------------------------|---------------------------------|---------------------------|
| 1   | 205.7               | 205.7                                   | 205.7                           | 0                         |
| 2   | 127.4               | 127.3                                   | 127.3                           | 0.1                       |
| 3   | 154.2               | 154.2                                   | 154.2                           | 0                         |
| 4   | 37.8                | 37.8                                    | 37.8                            | 0                         |
| 5   | 59.9                | 59.9                                    | 59.9                            | 0                         |
| 6   | 54.7                | 54.7                                    | 54.7                            | 0                         |
| 7   | 34.2                | 34.2                                    | 34.2                            | 0                         |
| 8   | 38.8                | 38.7                                    | 38.7                            | -0.1                      |
| 9   | 57.5                | 57.5                                    | 57.5                            | 0                         |
| 10  | 46.5                | 46.5                                    | 46.5                            | 0                         |
| 11  | 52.8                | 52.7                                    | 52.7                            | 0.1                       |
| 12  | 38.4                | 38.4                                    | 38.4                            | 0                         |
| 13  | 36.6                | 36.6                                    | 36.6                            | 0                         |
| 14  | 48.1                | 48.1                                    | 48.1                            | 0                         |
| 15  | 68.2                | 68.2                                    | 68.2                            | 0                         |
| 16  | 18.6                | 18.5                                    | 18.5                            | 0.1                       |
| 17  | 21.1                | 21.1                                    | 21.1                            | 0                         |
| 18  | 31.1                | 31.1                                    | 31.1                            | 0                         |
| 19  | 22.5                | 22.5                                    | 22.5                            | 0                         |
| 20  | 72.0                | 71.9                                    | 71.9                            | 0.1                       |

6.96  
6.94  
6.93  
6.92  
5.99  
5.98  
5.96  
5.96  
3.40  
3.39  
2.74  
2.73  
2.73  
2.71  
2.31  
2.30  
2.13  
2.12  
2.12  
2.10  
2.03  
1.99  
1.71  
1.71  
1.70  
1.70  
1.69  
1.69  
1.68  
1.67  
1.66  
1.66  
1.65  
1.64  
1.63  
1.62  
1.61  
1.61  
1.58  
1.57  
1.56  
1.55  
1.53  
1.52  
1.47  
1.46  
1.45  
1.44  
1.44  
1.43  
1.23  
1.21  
1.20  
1.18  
0.99

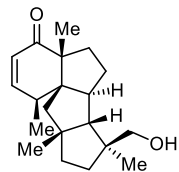

**Conidiogenone C (4)**  
CDCl<sub>3</sub>, 400 MHz  
This work

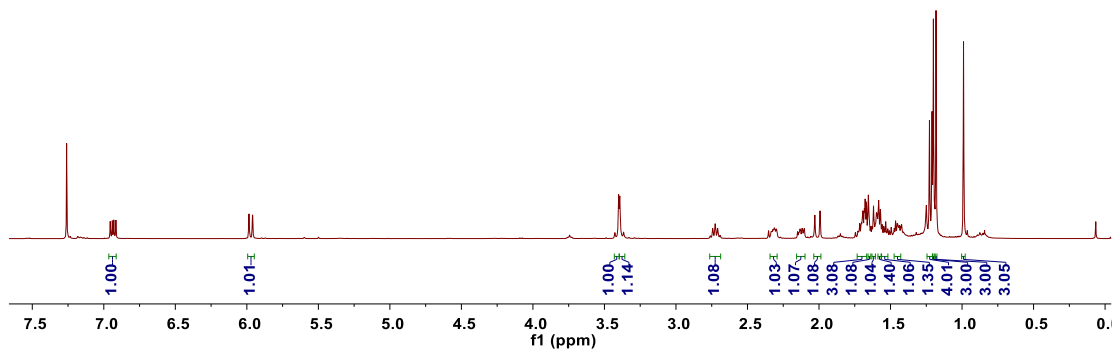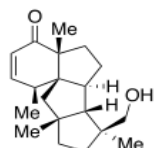

**11 conidiogenone C**  
(CDCl<sub>3</sub>, 500 MHz)  
Snyder Synthetic Sample

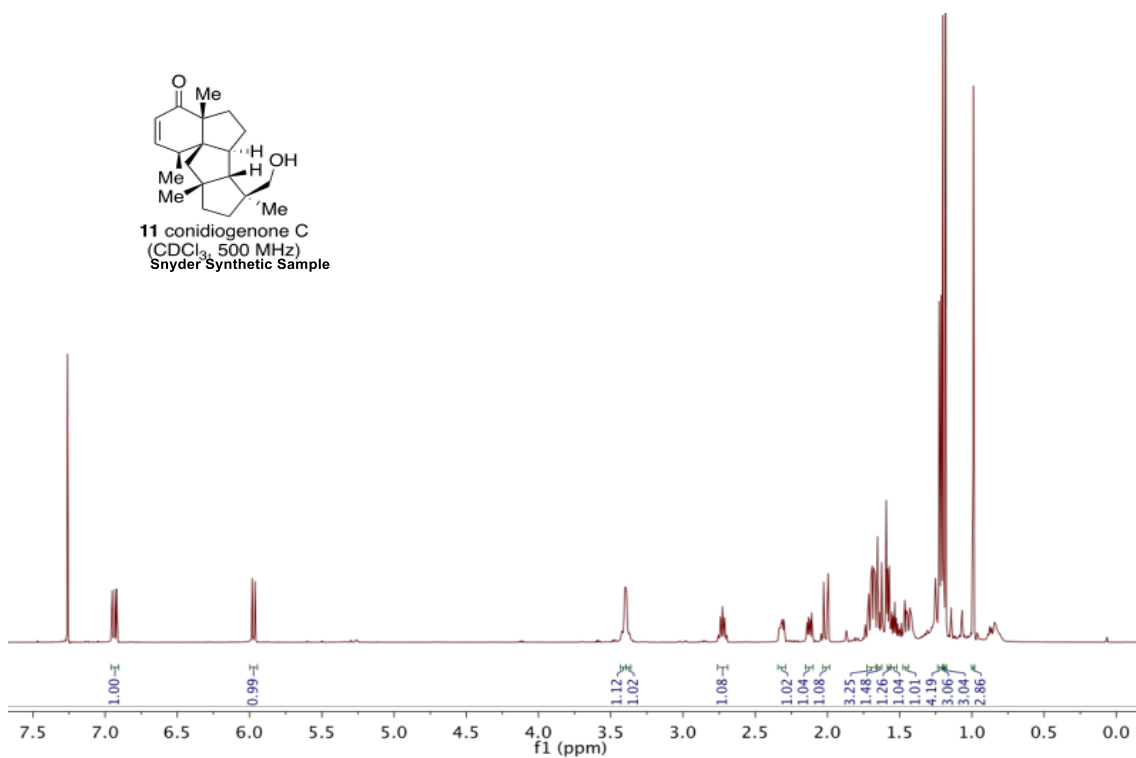

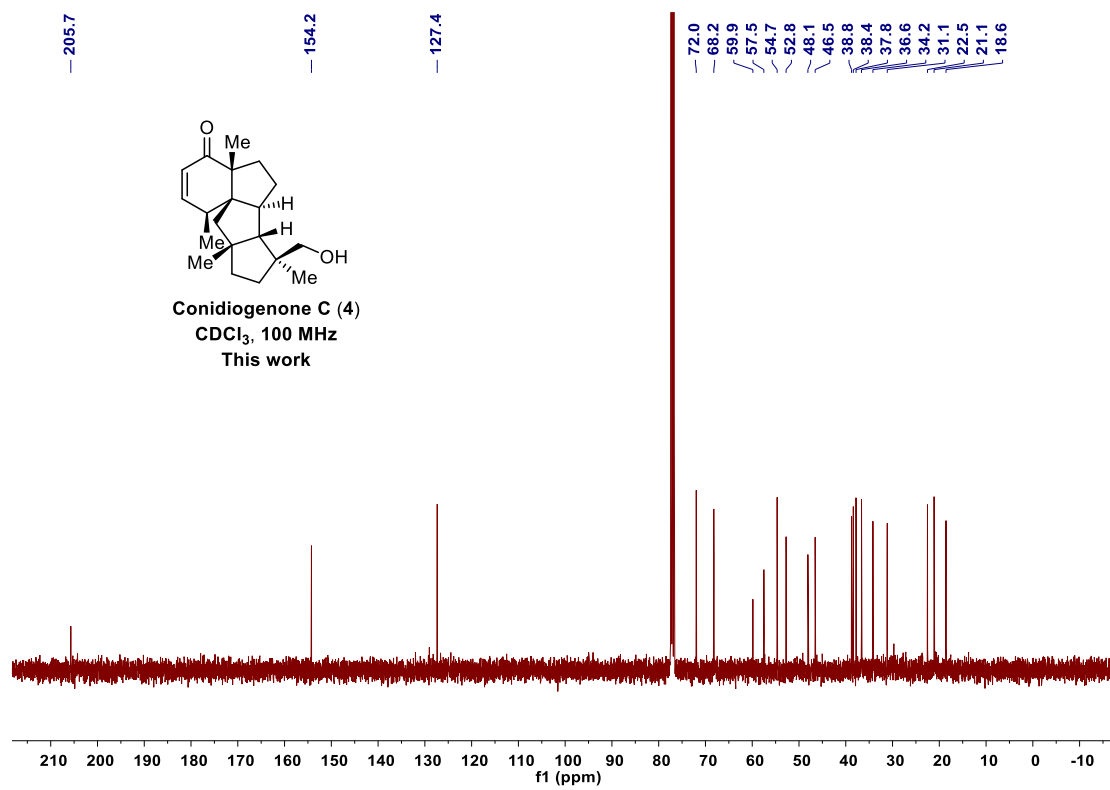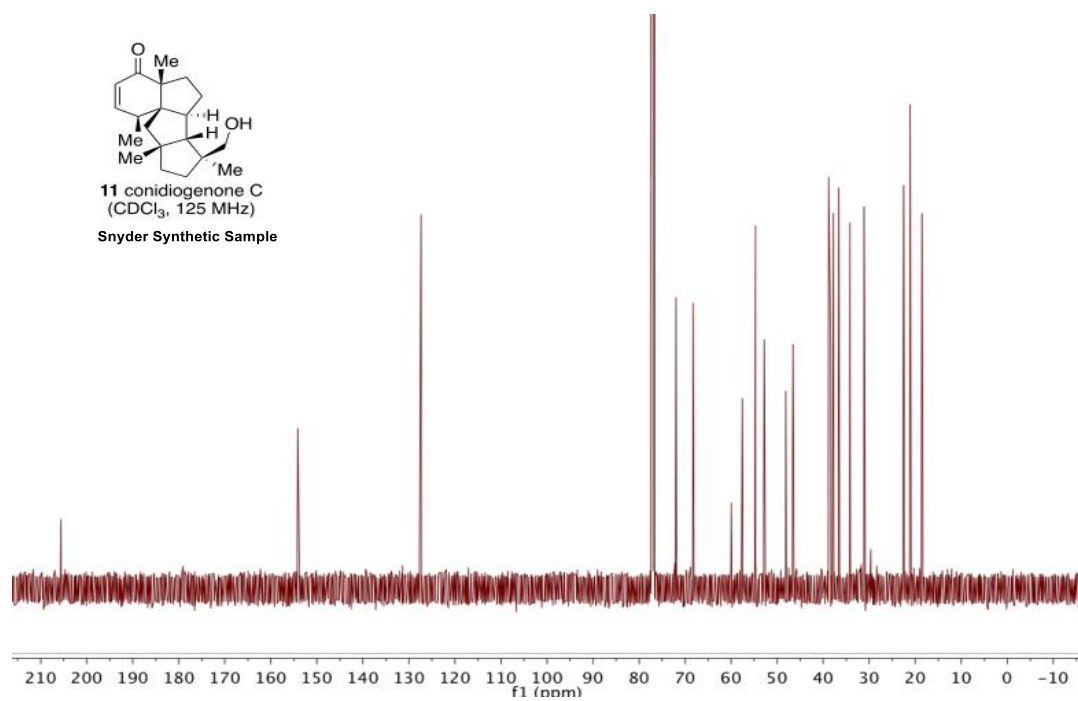

**Table S5. Comparison of natural and synthetic Conidiogenone K (8) ( $[\alpha]_D^{20}$ )**

| $[\alpha]_D^T$         |                                                |
|------------------------|------------------------------------------------|
| Natural <sup>[4]</sup> | $[\alpha]_D^{25} = -30.9$ ( $c = 0.28$ , MeOH) |
| Synthetic              | $[\alpha]_D^{20} = -56.6$ ( $c = 1$ , MeOH)    |

**Table S6. Comparison of natural and synthetic Conidiogenone K (8)**

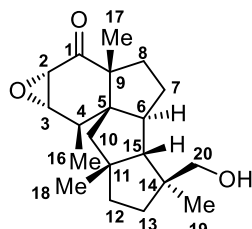

**Conidiogenone K**

| No. | <sup>1</sup> H NMR (CDCl <sub>3</sub> )                                  |                                                                            | <sup>13</sup> C NMR (CDCl <sub>3</sub> ) |                                    |                      |
|-----|--------------------------------------------------------------------------|----------------------------------------------------------------------------|------------------------------------------|------------------------------------|----------------------|
|     | Our sample<br>(400 Hz)                                                   | Natural <sup>[4]</sup><br>(400 Hz)                                         | Our sample<br>(100 Hz)                   | Natural <sup>[4]</sup><br>(100 Hz) | Different<br>(Δ ppm) |
| 1   |                                                                          |                                                                            | 212.5                                    | 212.6                              | - 0.1                |
| 2   | 3.33 (d, <i>J</i> = 4.2 Hz, 1H)                                          | 3.34 (d, <i>J</i> = 4.1 Hz)                                                | 53.5                                     | 53.5                               | 0                    |
| 3   | 3.53 (t, <i>J</i> = 3.7 Hz, 1H)                                          | 3.53 (t, <i>J</i> = 3.8 Hz,<br>1 H)                                        | 61.2                                     | 61.2                               | 0                    |
| 4   | 2.65 (dq, <i>J</i> = 7.1, 3.2<br>Hz, 1H)                                 | 2.65 (dq, <i>J</i> = 7.2,<br>3.1 Hz, 1 H)                                  | 35.1                                     | 35.0                               | 0.1                  |
| 5   |                                                                          |                                                                            | 59.6                                     | 59.6                               | 0                    |
| 6   | 2.86 (dt, <i>J</i> = 8.8, 4.6 Hz,<br>1H)                                 | 2.86 (m, 1 H)                                                              | 55.7                                     | 55.7                               | 0                    |
| 7   | 1.94– 1.90 (m, 1H);<br>1.28 – 1.23 (m, 1H)                               | 1.92 (m, 1 H); 1.26<br>(m, 1 H)                                            | 34.1                                     | 34.0                               | 0.1                  |
| 8   | 2.02 – 1.96 (m, 1H);<br>1.54 – 1.52 (m, 1H)                              | 1.99, (m, 1 H); 1.52,<br>(m, 1H)                                           | 40.1                                     | 40.1                               | 0                    |
| 9   |                                                                          |                                                                            | 56.9                                     | 56.8                               | 0.1                  |
| 10  | 1.88 (d, <i>J</i> = 14.6 Hz,<br>1H); 1.76 (d, <i>J</i> = 14.6<br>Hz, 1H) | 1.88 (d, <i>J</i> = 14.6 Hz,<br>1 H); 1.76 (d, <i>J</i> =<br>14.6 Hz, 1 H) | 48.0                                     | 48.0                               | 0                    |
| 11  |                                                                          |                                                                            | 52.1                                     | 52.1                               | 0                    |
| 12  | 1.72 – 1.67 (m, 1H);<br>1.52 – 1.47 (m, 1H)                              | 1.67 (m, 1 H); 1.52<br>(m, 1 H)                                            | 38.3                                     | 38.2                               | 0.1                  |
| 13  | 1.67 – 1.62 (m, 1H);<br>1.52 – 1.47 (m, 1H)                              | 1.67 (m, 1 H); 1.52<br>(m, 1 H)                                            | 36.6                                     | 36.6                               | 0                    |
| 14  |                                                                          |                                                                            | 48.2                                     | 48.2                               | 0                    |
| 15  | 1.55 (d, <i>J</i> = 4.4 Hz, 1 H)                                         | 1.55 (d, <i>J</i> = 4.3 Hz,<br>1 H)                                        | 65.7                                     | 65.6                               | 0.1                  |
| 16  | 1.03 (d, <i>J</i> = 7.1 Hz, 3H)                                          | 1.04 (d, <i>J</i> = 7.1 Hz,<br>3 H)                                        | 15.2                                     | 15.1                               | 0.1                  |
| 17  | 1.16 (s, 3H)                                                             | 1.16, (s, 3 H)                                                             | 22.3                                     | 22.3                               | 0                    |
| 18  | 1.19 (s, 3H)                                                             | 1.21, (s, 3 H)                                                             | 31.7                                     | 31.7                               | 0                    |
| 19  | 1.10 (s, 3H),                                                            | 1.10, (s, 3 H)                                                             | 22.4                                     | 22.4                               | 0                    |
| 20  | 3.42 (s, 2H)                                                             | 3.42, (s, 2 H)                                                             | 72.0                                     | 72.0                               | 0                    |



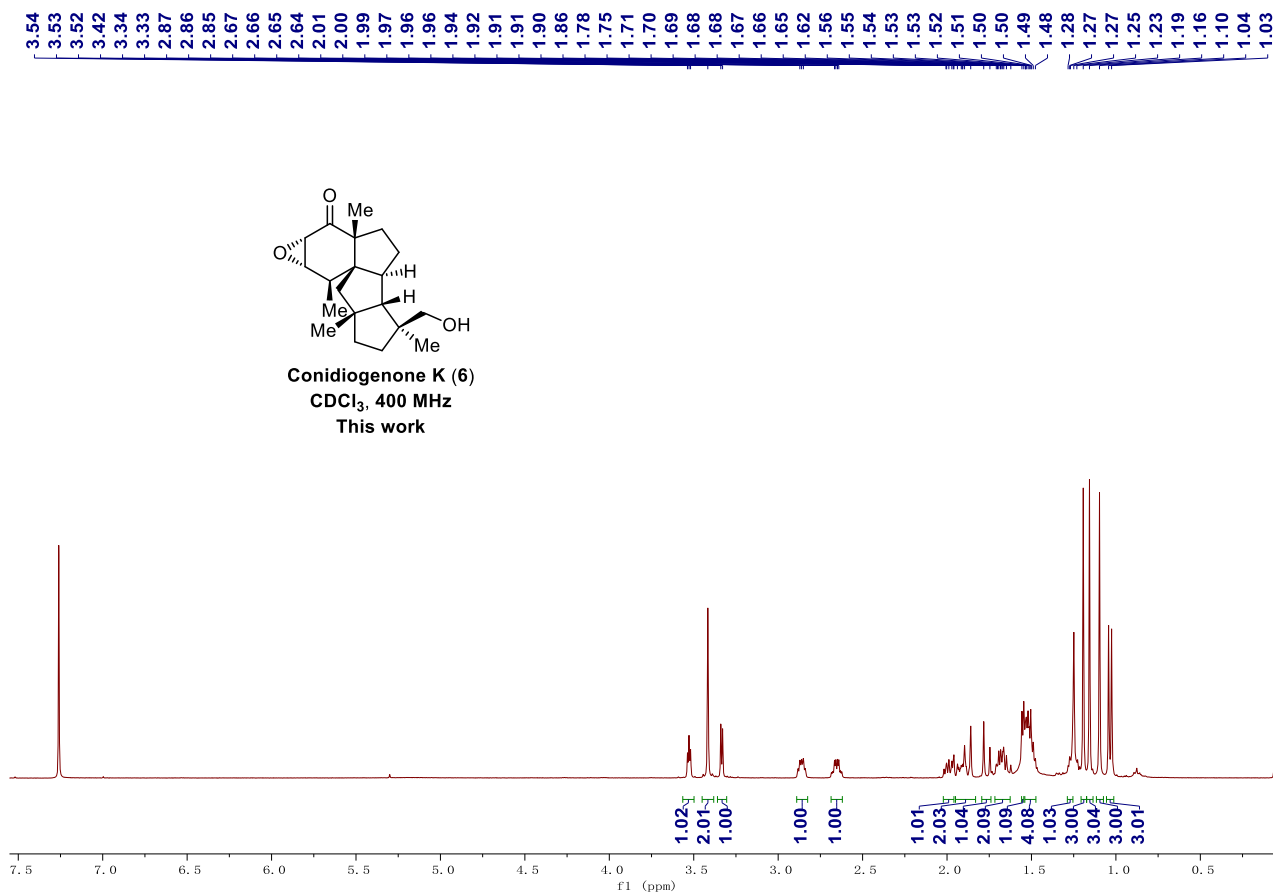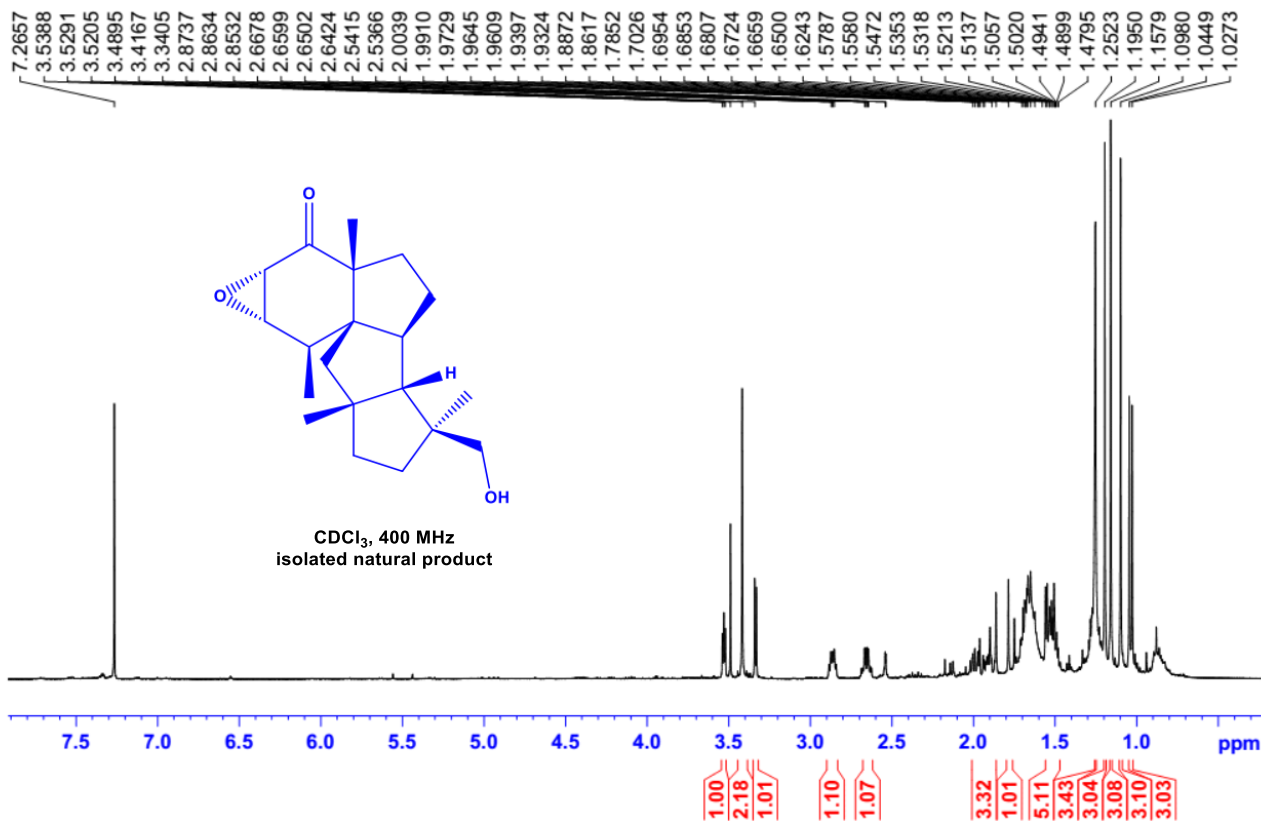

— 212.5

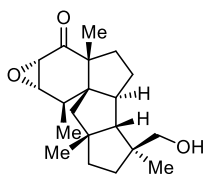

Conidiogenone K (6)  
CDCl<sub>3</sub>, 100 MHz  
This work

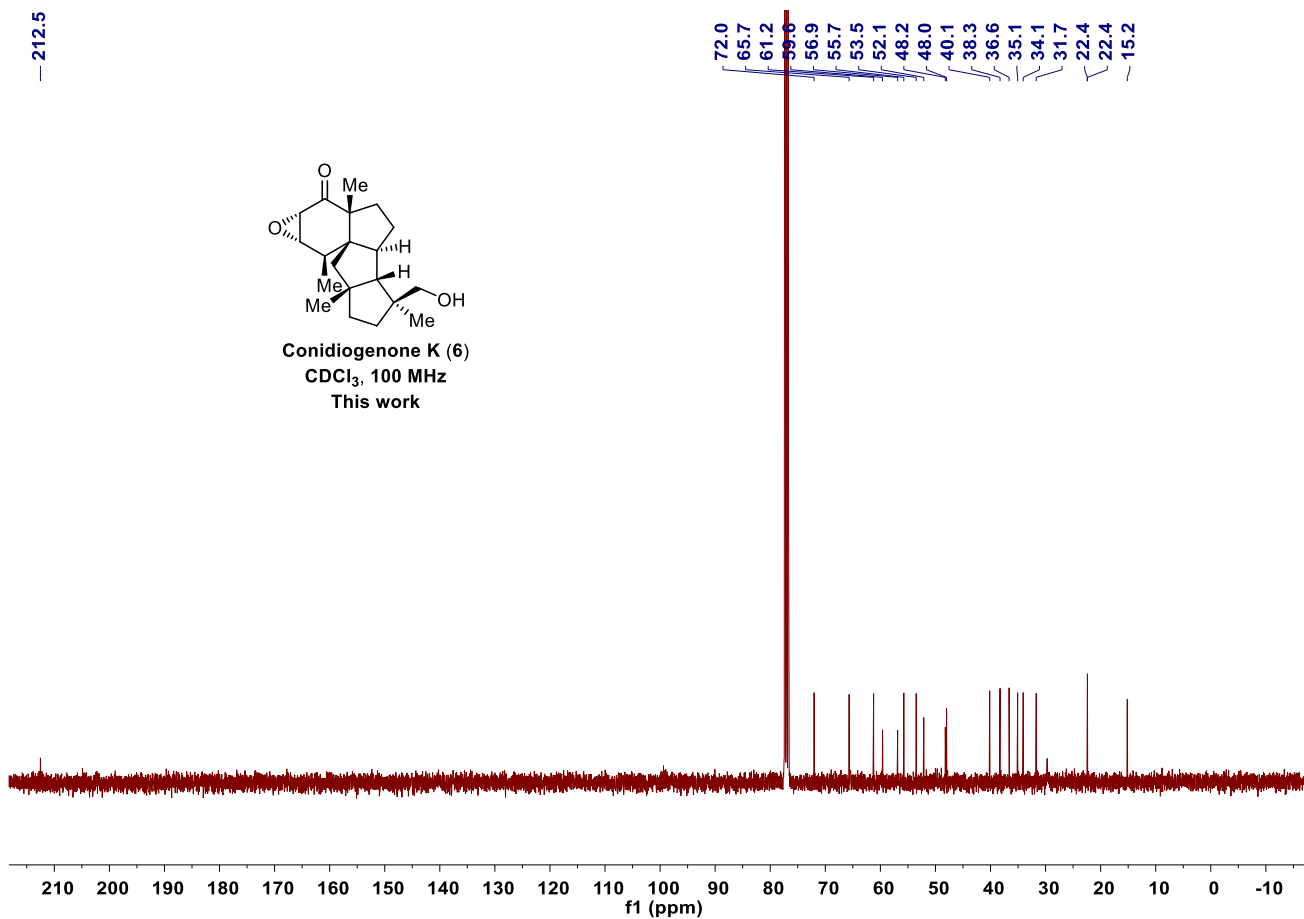

T3-1-28 13C NMR 100 MHz CD3OD

— 212.60

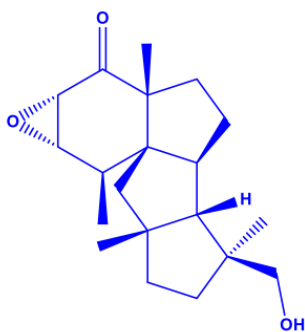

CDCl<sub>3</sub>, 100 MHz  
isolated natural product

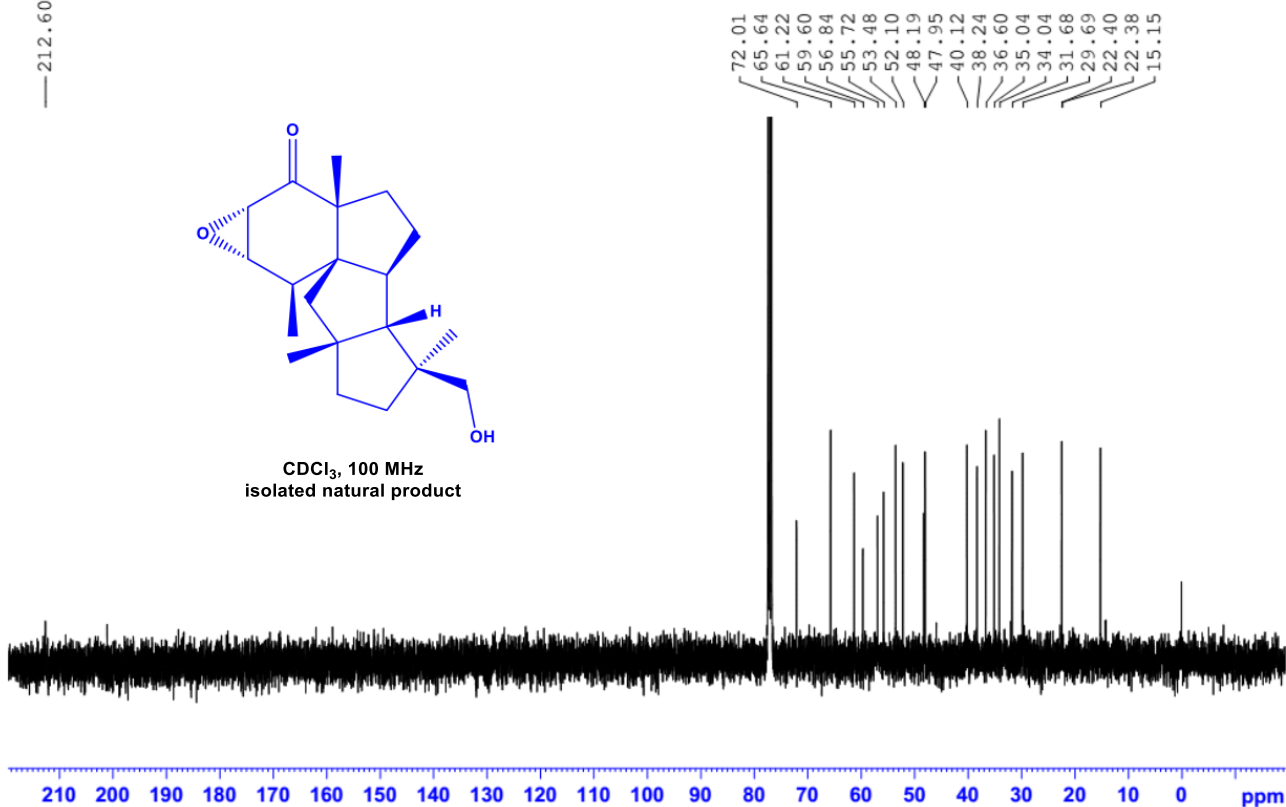

### 3. Experimental Procedures

#### 3.1 Total Synthesis of 12 $\beta$ -hydroxy Conidiogenone C

##### Synthesis of (–)-Wieland-Miescher ketone

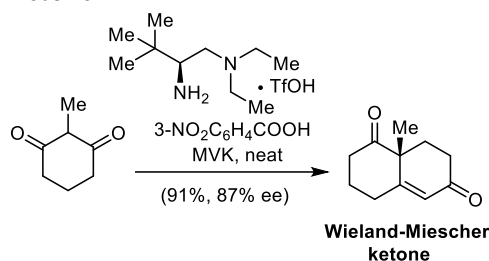

(*S*)-*N*<sup>1</sup>, *N*<sup>1'</sup>-diethyl-3,3-dimethylbutane-1,2-diamine (56.8 mg, 0.32 mmol), Trifluoromethanesulfonic acid (28.3  $\mu$ L, 0.32 mmol), 2-methylcyclohexane-1,3-dione (2 g, 15.8 mmol), *m*-nitrobenzoic acid (26.7 mg, 0.16 mmol) and methyl vinyl ketone (2 mL) were added to a 10 mL sealed tube at room temperature. Then the mixture was stirred at 60 °C for 12 h. After completing the reaction, the mixture was concentrated and purified via flash chromatography (EtOAc / petroleum ether = 1/3) to afford (–)-Wieland-Miescher ketone (2.57 g, 14.43 mmol, 91% yield, 87% ee) as a yellow oil.

$R_f$  = 0.21 (silica, EtOAc: petroleum ether = 1: 3, stains with PMA);

<sup>1</sup>H NMR (400 MHz, CDCl<sub>3</sub>):  $\delta$  5.82 (d, *J* = 1.8 Hz, 1H), 2.74 – 2.63 (m, 2H), 2.51 – 2.40 (m, 4H), 2.16 – 2.07 (m, 3H), 1.68 (qt, *J* = 13.3, 4.4 Hz, 1H), 1.42 (s, 3H);

<sup>13</sup>C NMR (100 MHz, Chloroform-*d*):  $\delta$  211.0, 198.3, 165.9, 125.8, 50.6, 37.7, 33.6, 31.7, 29.7, 23.3, 22.9;

HRMS ESI Calcd for C<sub>11</sub>H<sub>14</sub>O<sub>2</sub>Na [M+Na]<sup>+</sup> 201.0886, found 201.0887;

$[\alpha]_D^{20}$  = – 89.2 (*c* = 1, C<sub>6</sub>H<sub>6</sub>), reported  $[\alpha]_D^{20}$  = – 96.0 (*c* = 1, C<sub>6</sub>H<sub>6</sub>)<sup>[5]</sup>.

##### Synthesis of ketal compound S1

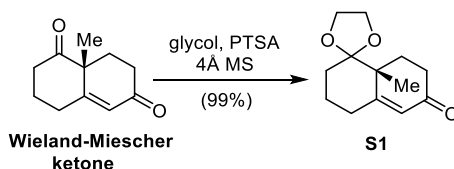

To a stirred solution of (–)-Wieland-Miescher ketone (10 g, 56.1 mmol) in ethylene glycol (280 mL, 0.2 M) at room temperature was added 4 Å molecular sieves and *p*-toluenesulfonic acid (10.67 g, 56.1 mmol). The reaction mixture stirred at room temperature for 23 min before being poured into saturated aqueous NaHCO<sub>3</sub> (600 mL) and ice water (300 mL). Then the aqueous layer was extracted with EtOAc (3  $\times$  400 mL), and the combined organic layer were washed with brine, dried over anhydrous Na<sub>2</sub>SO<sub>4</sub> and concentrated under reduced pressure. The residue was purified by flash column chromatography (EtOAc / petroleum ether = 1/3) to afford **S1** (12.34 g, 55.51 mmol, 99%) as a colorless oil.

$R_f$  = 0.28 (silica, EtOAc: petroleum ether = 1: 3, stains with PMA);

<sup>1</sup>H NMR (400 MHz, CDCl<sub>3</sub>)  $\delta$  5.79 (d, *J* = 1.8 Hz, 1H), 3.98 – 3.91 (m, 4H), 2.45 – 2.35 (m, 3H), 2.30 – 2.23 (m, 2H), 1.91 – 1.84 (m, 1H), 1.80 – 1.74 (m, 1H), 1.71 – 1.63 (m, 3H), 1.33 (s, 3H);

<sup>13</sup>C NMR (100 MHz, Chloroform-*d*)  $\delta$  199.2, 167.8, 125.7, 112.4, 65.4, 65.1, 45.1, 33.9, 31.5, 30.1, 26.9, 21.8, 20.5;

HRMS ESI Calcd for C<sub>13</sub>H<sub>18</sub>O<sub>3</sub>Na [M+Na]<sup>+</sup> 245.1148, found 245.1148;

$[\alpha]_D^{20}$  = – 84.4 (*c* = 0.5, C<sub>6</sub>H<sub>6</sub>), reported  $[\alpha]_D^{25}$  = – 77 (*c* = 1, C<sub>6</sub>H<sub>6</sub>)<sup>[5]</sup>.

## Synthesis of compound S2

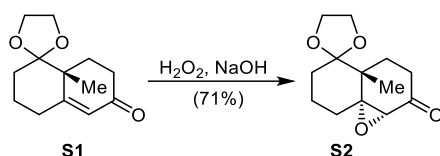

To a stirred solution of ketal **S1** (10 g, 44.98 mmol) in methanol (103 mL, 0.44 M) was added hydrogen peroxide aqueous solution (15.29 mL, 134.94 mmol, 30 % (w/w)) dropwise and sodium hydroxide aqueous solution (8.996 mL, 22.49 mmol, 10 % (w/w)), dropwise at 0 °C over 30 min. The reaction mixture was stirred at 15°C for 3 d. Additional hydrogen peroxide aqueous solution (5.10 mL, 44.98 mmol) was added dropwise after each 24 h period. After 3d, the reaction mixture was added saturated sodium thiosulfate aqueous solution (200 mL), and the aqueous layer was extracted with EtOAc (3 × 200 mL). The combined organic layers were dried over anhydrous Na<sub>2</sub>SO<sub>4</sub> and concentrated under reduced pressure. Subsequently, the resulting crude mixture was purified by flash column chromatography (EtOAc / petroleum ether = 1/3) to afford **S2** (7.61 g, 31.94 mmol, 71%) as a colorless solid.

**R<sub>f</sub>** = 0.27 (silica, EtOAc: petroleum ether = 1: 5, stains with PMA);

**Mp** 130.5 – 132.5 °C;

**<sup>1</sup>H NMR (400 MHz, Chloroform-*d*)** δ 4.01 (td, *J* = 6.5, 4.6 Hz, 1H), 3.91 – 3.82 (m, 3H), 3.07 (s, 1H), 2.32 – 2.26 (m, 2H), 2.19 (dd, *J* = 13.3, 4.3 Hz, 1H), 1.87 – 1.74 (m, 3H), 1.72 – 1.60 (m, 4H), 1.25 (s, 3H);

**<sup>13</sup>C NMR (100 MHz, Chloroform-*d*)** δ 207.4, 113.4, 68.9, 65.3, 64.1, 63.1, 42.6, 34.3, 30.0, 29.4, 25.2, 21.5, 20.0;

**HRMS ESI** calcd for C<sub>13</sub>H<sub>18</sub>O<sub>4</sub>Na [M+Na]<sup>+</sup> 261.1097, found 261.1099;

**IR (neat)** *V*<sub>max</sub> 2946, 2306, 1705, 1523, 1062, 755 cm<sup>-1</sup>;

**[α]<sub>D</sub><sup>20</sup>** = – 124.2 (*c* = 0.5, CHCl<sub>3</sub>).

## Synthesis of compound S3

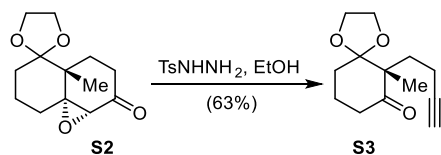

To a stirred solution of **S2** (280 mg, 1.17 mmol) in ethanol (11.8 mL) was added 4 Å molecular sieves and *p*-toluenesulfonyl hydrazide (219.4 mg, 1.17 mmol) at room temperature. Then the reaction mixture was heated to 50 °C and stirred overnight. After completing the reaction, the reaction mixture was quickly filtered with silica gel, and poured into saturated aqueous NaHCO<sub>3</sub>. Subsequently, the aqueous layer was extracted with EtOAc (3 × 20 mL), washed with brine, dried over anhydrous Na<sub>2</sub>SO<sub>4</sub> and concentrated under reduced pressure. The resulting crude mixture was purified by flash column chromatography (EtOAc / petroleum ether = 1/8) to afford **S3** (164 mg, 0.74 mmol, 63%) as a colorless oil.

**R<sub>f</sub>** = 0.39 (silica, EtOAc: petroleum ether = 1: 8, stains with PMA);

**<sup>1</sup>H NMR (500 MHz, Chloroform-*d*)** δ 3.95-3.94 (m, 4H), 2.51 – 2.45 (m, 1H), 2.38 – 2.33 (m, 1H), 2.24 – 2.18 (m, 1H), 2.15 – 1.98 (m, 3H), 1.96 – 1.93 (m, 2H), 1.82 – 1.78 (m, 2H), 1.76 – 1.70 (m, 1H), 1.05 (s, 3H);

**<sup>13</sup>C NMR (125 MHz, Chloroform-*d*)** δ 211.6, 113.6, 84.1, 68.6, 65.4, 65.2, 58.5, 37.2, 33.8, 29.6, 19.4, 13.9, 13.6;

**HRMS ESI** calcd for C<sub>13</sub>H<sub>18</sub>O<sub>3</sub>Na [M+Na]<sup>+</sup> 245.1148, found 245.1148;

**IR (neat)**  $\nu_{\text{max}}$  2954, 2886, 1709, 1138, 1068, 1030  $\text{cm}^{-1}$ ;

$[\alpha]_{\text{D}}^{20} = -115.4$  ( $c = 0.5$ ,  $\text{CHCl}_3$ ).

### Synthesis of compound 11

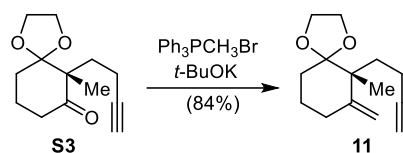

Prior to the reaction set-up, methyltriphenylphosphoniumbromide (12.54 g, 35.1 mmol) was heated to 110 °C and stirred overnight. To a solution of the above dry methyltriphenylphosphoniumbromide in THF (35 mL) was added potassium tert-butoxide (3.94 g, 35.1 mmol) and the resulting solution was stirred at 0 °C for 40 min, followed by the addition of **S3** (1.95 g, 8.77 mmol) in THF (5 mL, final concentration 0.2 M) via cannula at 0 °C. After being stirred for 12 h at room temperature, the resulting mixture was added saturated  $\text{NH}_4\text{Cl}$  aqueous solution (150 mL) and the aqueous layer was extracted with EtOAc ( $3 \times 150$  mL). The combined organic layers were dried over anhydrous  $\text{Na}_2\text{SO}_4$  and concentrated under reduced pressure. Then the resulting crude mixture was purified by flash column chromatography (EtOAc / petroleum ether = 1/30) to yield compound **11** (1.65 g, 7.49 mmol, 84%) as a colorless solid.

**R<sub>f</sub>** = 0.42 (silica, EtOAc: petroleum ether = 1: 30, stains with PMA);

**Mp**: 61.2 – 63.5 °C;

**<sup>1</sup>H NMR (500 MHz, Chloroform-*d*)**  $\delta$  4.91 (d,  $J = 1.6$  Hz, 1H), 4.71 (d,  $J = 1.6$  Hz, 1H), 3.97 – 3.91 (m, 4H), 2.17 – 2.14 (m, 2H), 2.03 – 2.01 (m, 2H), 1.91 – 1.90 (m, 2H), 1.88 – 1.81 (m, 2H), 1.72 – 1.67 (m, 1H), 1.65 – 1.61 (m, 1H), 1.55 – 1.46 (m, 1H), 1.01 (s, 3H);

**<sup>13</sup>C NMR (125 MHz, Chloroform-*d*)**  $\delta$  150.6, 112.9, 110.7, 85.2, 67.9, 65.3, 65.1, 49.1, 33.7, 31.7, 30.2, 23.4, 15.5, 13.4;

**HRMS ESI** calcd for  $\text{C}_{14}\text{H}_{20}\text{O}_2\text{Na}$   $[\text{M}+\text{Na}]^+$  243.1356, found 243.1359;

**IR (neat)**  $\nu_{\text{max}}$  3257, 2950, 2884, 1081, 899, 685  $\text{cm}^{-1}$ ;

$[\alpha]_{\text{D}}^{20} = -42.9$  ( $c = 1$ ,  $\text{CHCl}_3$ ).

## Synthesis of compound 12

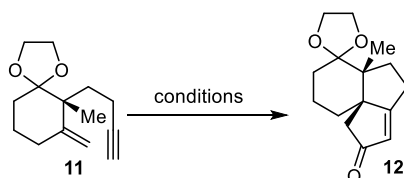

| Entry | Reagent                                        | Additive | Solvent | Temp(°C) | Yield (%) <sup>a</sup> |
|-------|------------------------------------------------|----------|---------|----------|------------------------|
| 1     | Co <sub>2</sub> (CO) <sub>8</sub> (1.0 eq)     | TMANO    | toluene | 110      | 50                     |
| 2     | Co <sub>2</sub> (CO) <sub>8</sub> (0.3 eq)     | TMTU     | toluene | 110      | 11                     |
| 3     | CoBr <sub>2</sub> (0.1 eq)<br>Zn (1.0 eq)      | TMTU     | toluene | 70       | 0                      |
| 4     | [Rh(CO) <sub>2</sub> Cl] <sub>2</sub> (0.1 eq) | none     | DCE     | 80       | 0                      |
| 5     | Co <sub>2</sub> (CO) <sub>8</sub> (0.8 eq)     | 4A MS    | toluene | 110      | 46                     |
| 6     | Co <sub>2</sub> (CO) <sub>8</sub> (1.0 eq)     | NMO      | toluene | 110      | 60                     |
| 7     | Co <sub>2</sub> (CO) <sub>8</sub> (0.8 eq)     | NMO      | toluene | 110      | 60                     |

<sup>a</sup>Isolated yield

To a solution of the compound **11** (945 mg, 4.29 mmol) in toluene (30 mL) was added Co<sub>2</sub>(CO)<sub>8</sub> (1.17 g, 3.43 mmol) under 1 atm of CO, the mixture was stirred at rt for 2 h. After the complete transformation of the starting material, the reaction mixture was added NMO (1.512 g, 12.87 mmol) and heated at 110 °C for 18 h. The reaction mixture was cooled to room temperature, and concentrated under reduced pressure, the residue was purified by flash column chromatography on silica gel (EtOAc / petroleum ether = 1 / 8) to give product **12** (639 mg, 2.57 mmol, 60%) as a colorless oil.

**R<sub>f</sub>** = 0.21 (silica, EtOAc: petroleum ether = 1: 8, stains with PMA);

**<sup>1</sup>H NMR (500 MHz, Chloroform-*d*)** δ 5.75 (t, *J* = 1.7 Hz, 1H), 3.95 – 3.90 (m, 4H), 2.78 – 2.71 (m, 1H), 2.61 – 2.54 (m, 1H), 2.44 (d, *J* = 17.9 Hz, 2H), 2.13 (d, *J* = 18.1 Hz, 1H), 1.76 – 1.71 (m, 2H), 1.68 – 1.61 (m, 4H), 1.13 – 1.08 (m, 1H), 0.75 (s, 3H);

**<sup>13</sup>C NMR (125 MHz, Chloroform-*d*)** δ 211.5, 193.3, 124.0, 111.2, 65.2, 65.1, 58.7, 48.1, 44.9, 34.5, 34.1, 30.4, 23.6, 21.8, 15.6;

**HRMS ESI** calcd for C<sub>15</sub>H<sub>20</sub>O<sub>3</sub>Na [M+Na]<sup>+</sup> 271.1305, found 271.1305;

**IR (neat)** *V*<sub>max</sub> 2938, 2873, 1705, 1628, 1146, 1115, 1030 cm<sup>-1</sup>;

[*α*]<sub>D</sub><sup>20</sup> = 79.2 (*c* = 0.5, CHCl<sub>3</sub>).

## Synthesis of compound 18

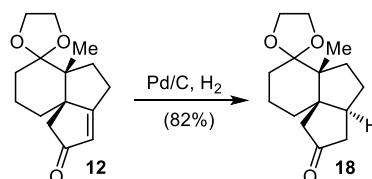

To a solution of the compound **12** (445 mg, 1.79 mmol) in methanol (8 mL) were added 10% Pd/C (44.5 mg). The mixture was hydrogenated with a H<sub>2</sub> balloon until the starting material disappeared on TLC. Then the catalyst

was filtered off, the solvent was evaporated *in vacuo*, and the residue was purified by flash column chromatography on silica gel (EtOAc / petroleum ether = 1 / 8) to give product **18** (367 mg, 1.47 mmol, 82%) as a colorless solid.

**R<sub>f</sub>** = 0.40 (silica, EtOAc: petroleum ether = 1: 8, stains with PMA);

**Mp** 41.2 – 43.1 °C;

**<sup>1</sup>H NMR (500 MHz, Chloroform-*d*)** δ 3.99 – 3.89 (m, 4H), 2.84 (q, *J* = 8.6 Hz, 1H), 2.39 (dd, *J* = 19.9, 8.8 Hz, 1H), 2.33 (d, *J* = 18.5 Hz, 1H), 2.16 – 2.11 (m, 2H), 1.92 (ddd, *J* = 14.2, 10.0, 4.4 Hz, 1H), 1.83 (d, *J* = 18.3 Hz, 1H), 1.65 (d, *J* = 11.9 Hz, 1H), 1.60 (dd, *J* = 12.5, 3.6 Hz, 1H), 1.56 – 1.50 (m, 3H), 1.44 (ddd, *J* = 13.5, 11.5, 5.8 Hz, 1H), 1.36 (ddd, *J* = 17.4, 12.7, 4.6 Hz, 1H), 1.25 (dt, *J* = 12.6, 5.6 Hz, 1H), 1.03 (s, 3H);

**<sup>13</sup>C NMR (125 MHz, Chloroform-*d*)** δ 220.7, 112.7, 65.1(2C), 63.9, 55.2, 51.9, 49.5, 44.4, 41.6, 33.1, 31.2, 30.2, 19.5, 19.2;

**HRMS ESI** calcd for C<sub>15</sub>H<sub>22</sub>O<sub>3</sub>Na [M+Na]<sup>+</sup> 273.1461, found 273.1460;

**IR (neat)** *V*<sub>max</sub> 2945, 2904, 1738, 1169, 1129, 1049, 953, 910 cm<sup>-1</sup>;

[*α*]<sub>D</sub><sup>20</sup> = – 29.6 (*c* = 1, CHCl<sub>3</sub>).

### Synthesis of compound 20

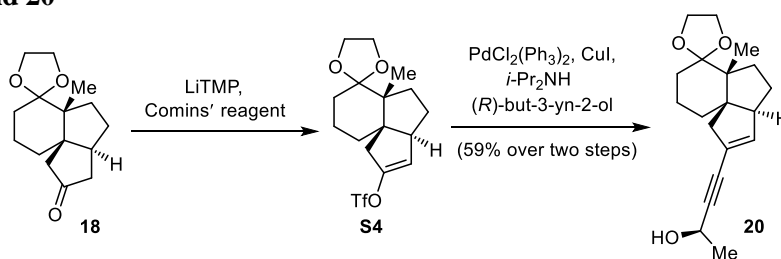

| Entry | Conditions                                                                               | Yield (%) <sup>a</sup> | Ratio |
|-------|------------------------------------------------------------------------------------------|------------------------|-------|
| 1     | N <sub>2</sub> H <sub>4</sub> •H <sub>2</sub> O, Et <sub>3</sub> N/ I <sub>2</sub> , TMG | 81                     | 3:2   |
| 2     | N <sub>2</sub> H <sub>4</sub> •H <sub>2</sub> O, DBU/ I <sub>2</sub> , TMG               | 38                     | 2:1   |
| 3     | KHMDS, Comins' reagent                                                                   | 91                     | 2.1:1 |
| 4     | LiTMP, Comins' reagent                                                                   | 87                     | 3:1   |

<sup>a</sup>Isolated yield

To a stirred solution of HTMP (0.20 mL, 1.2 mmol) in anhydrous THF (8 mL) at –78 °C under argon was added *n*-BuLi (0.75 mL, 1.2 mmol, 1.6 M in hexane) and the solution was stirred at –78 °C for 40 min. Then the freshly prepared LiTMP was added a solution of **18** (150 mg, 0.6 mmol) in anhydrous THF (4 mL). After stirred at 0°C for an hour, a solution of Comins' reagent (589 mg, 1.5 mmol) in dry THF (4 mL) was added to reaction mixture. After 3 h, the reaction mixture was quenched by saturated NH<sub>4</sub>Cl aqueous solution (20 mL) and extract with EtOAc (3 × 15 mL). The combined organic layers were washed with brine, concentrated and purified by flash chromatography (EtOAc / petroleum ether = 1 / 8) to afford product **S4** as a colorless oil.

To a solution of vinyl triflate **S4** (149.5 mg, 0.39 mmol) in dry THF (6 mL) was added diisopropylamine (0.734 mL, 5.2 mmol), (*R*)-but-3-yn-2-ol (0.045 mL, 0.52 mmol), PdCl<sub>2</sub>(PPh<sub>3</sub>)<sub>2</sub> (7.3 mg, 0.0104 mmol) and CuI (4.0 mg, 0.0208 mmol) under argon. The resulting mixture was stirred at ambient temperature for 2 h before being treated with H<sub>2</sub>O (20 mL) and diluted with EtOAc (3 × 20 mL). Then the combined organic layers were washed with brine, dried over anhydrous Na<sub>2</sub>SO<sub>4</sub> and concentrated under reduced pressure. The residue was purified

through flash column chromatography (EtOAc / petroleum ether = 1 / 8) to yield enynyl alcohol **20** (106.9 mg, 0.35 mmol, 59% for two steps) as a colorless oil.

$R_f = 0.27$  (silica, EtOAc: petroleum ether = 1: 8, stains with PMA);

$^1\text{H NMR}$  (500 MHz, Chloroform-*d*)  $\delta$  5.93 (q,  $J = 2.2$  Hz, 1H), 4.65 (q,  $J = 6.7$  Hz, 1H), 3.96 – 3.86 (m, 4H), 2.95 – 2.91 (m,  $J = 8.1, 5.7, 2.8$  Hz, 1H), 2.76 (dt,  $J = 16.3, 2.2$  Hz, 1H), 1.99 – 1.90 (m, 3H), 1.87 (s, 1H), 1.65 (ddd,  $J = 21.6, 10.3, 6.1$  Hz, 2H), 1.57 – 1.55 (m, 2H), 1.52 – 1.46 (m, 2H), 1.46 (d,  $J = 6.5$  Hz, 3H), 1.43 – 1.39 (m, 2H), 0.94 (s, 3H);

$^{13}\text{C NMR}$  (125 MHz, Chloroform-*d*)  $\delta$  142.4, 121.8, 113.1, 91.4, 81.6, 64.8, 64.5, 58.9, 58.1, 56.3, 51.5, 46.2, 35.4, 35.0, 30.9, 28.7, 24.5, 20.6, 17.2;

HRMS ESI calcd for  $\text{C}_{19}\text{H}_{26}\text{O}_3\text{Na}$   $[\text{M}+\text{Na}]^+$  325.1774, found 325.1775;

IR (neat)  $\nu_{\text{max}}$  3456, 2936, 2876, 1788, 1706, 1114, 1080, 1051  $\text{cm}^{-1}$ ;

$[\alpha]_{\text{D}}^{20} = -5.9$  ( $c = 1, \text{CHCl}_3$ ).

### Synthesis of compound 13

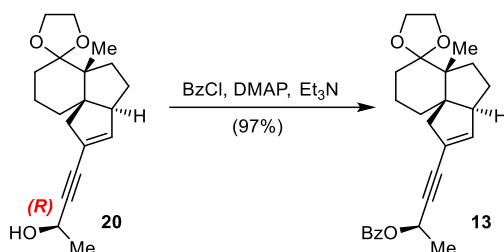

To a solution of enynyl alcohol **20** (675 mg, 2.23 mmol) in dry DCM (11 mL) was added DMAP (54 mg, 0.446 mmol), Et<sub>3</sub>N (0.34 mL, 2.45 mmol), BzCl (0.28 mL, 2.45 mmol) under argon. Then the resulting mixture was stirred at ambient temperature for 2 h. After completing the reaction, the mixture was quenched by H<sub>2</sub>O (10 mL) and diluted with DCM (3 × 20 mL). The combined organic layers were washed with brine, dried over anhydrous Na<sub>2</sub>SO<sub>4</sub> and concentrated under reduced pressure. Afterwards, the residue was purified through flash column chromatography (EtOAc / petroleum ether = 1 / 8) to yield **13** (880 mg, 2.16 mmol, 97%) as a colorless oil.

$R_f = 0.31$  (silica, EtOAc: petroleum ether = 1: 30, stains with PMA);

$^1\text{H NMR}$  (500 MHz, Chloroform-*d*)  $\delta$  8.08 (dd,  $J = 8.3, 1.5$  Hz, 2H), 7.57 – 7.54 (m, 1H), 7.44 (t,  $J = 7.7$  Hz, 2H), 5.98 (q,  $J = 2.3$  Hz, 1H), 5.85 (q,  $J = 6.6$  Hz, 1H), 3.96 – 3.85 (m, 4H), 2.95 – 2.91 (m, 1H), 2.77 (dt,  $J = 16.4, 2.2$  Hz, 1H), 1.99 – 1.97 (m, 1H), 1.96 – 1.91 (m, 2H), 1.63 (d,  $J = 6.6$  Hz, 3H), 1.57 (dd,  $J = 6.9, 3.9$  Hz, 4H), 1.50 – 1.38 (m, 4H), 0.94 (s, 3H);

$^{13}\text{C NMR}$  (125 MHz, Chloroform-*d*)  $\delta$  165.5, 143.1, 133.0, 130.2, 129.8, 128.3, 121.6, 113.1, 87.8, 82.4, 64.8, 64.5, 61.6, 58.2, 56.2, 51.5, 46.1, 35.5, 34.9, 30.9, 28.7, 21.7, 20.5, 17.2;

HRMS ESI calcd for  $\text{C}_{26}\text{H}_{30}\text{O}_4\text{Na}$   $[\text{M}+\text{Na}]^+$  429.2036, found 429.2037;

IR (neat)  $\nu_{\text{max}}$  2937, 2874, 1722, 1266, 1100, 1074, 1049, 1023, 713  $\text{cm}^{-1}$ ;

$[\alpha]_{\text{D}}^{20} = -7.7$  ( $c = 1, \text{CHCl}_3$ ).



## Synthesis of compound 23

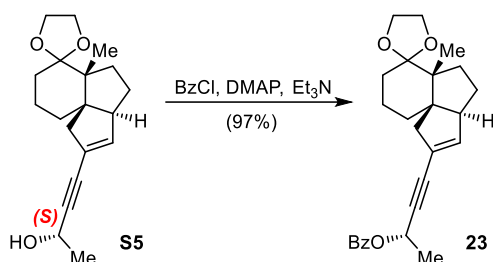

To a solution of enynyl alcohol **5** (100 mg, 0.33 mmol) in dry DCM (1.5 mL) was added DMAP (8.1 mg, 0.066 mmol), Et<sub>3</sub>N (0.05 mL, 0.36 mmol), BzCl (0.042 mL, 0.36 mmol) under argon. Then the resulting mixture was stirred at ambient temperature for 2 h. After completing the reaction, the mixture was quenched by H<sub>2</sub>O (3 mL) and diluted with DCM (3 × 5 mL). The combined organic layer was washed with brine, dried over anhydrous Na<sub>2</sub>SO<sub>4</sub> and concentrated under reduced pressure. Afterwards, the residue was purified through flash column chromatography (EtOAc / petroleum ether = 1 / 8) to yield **23** (130 mg, 0.32 mmol, 97%) as a colorless oil.

**R<sub>f</sub>** = 0.31 (silica, EtOAc: petroleum ether = 1: 30, stains with PMA);

**<sup>1</sup>H NMR (400 MHz, Chloroform-*d*)** δ 8.08 (dd, *J* = 8.1, 1.4 Hz, 2H), 7.58 – 7.54 (m, 1H), 7.44 (t, *J* = 7.6 Hz, 2H), 5.98 (d, *J* = 2.4 Hz, 1H), 5.85 (q, *J* = 6.6 Hz, 1H), 3.96 – 3.86 (m, 4H), 2.93 – 2.91 (m, 1H), 2.77 (dt, *J* = 16.3, 2.3 Hz, 1H), 1.99 – 1.91 (m, 3H), 1.63 (d, *J* = 6.6 Hz, 3H), 1.57 (d, *J* = 6.8 Hz, 4H), 1.50 – 1.38 (m, 4H), 0.94 (s, 3H).

**<sup>13</sup>C NMR (100 MHz, Chloroform-*d*)** δ 165.5, 143.2, 133.0, 130.1, 129.8, 128.3, 121.5, 113.1, 87.8, 82.3, 64.8, 64.5, 61.6, 58.1, 56.2, 51.4, 46.0, 35.4, 34.9, 30.9, 28.7, 21.7, 20.6, 17.2.

**HRMS ESI** calcd for C<sub>26</sub>H<sub>30</sub>O<sub>4</sub>Na [M+Na]<sup>+</sup> 429.2036, found 429.2035;

**IR (neat)** *V*<sub>max</sub> 2943, 1714, 1264, 1094, 1029 cm<sup>-1</sup>;

**[α]<sub>D</sub><sup>20</sup>** = – 0.8 (*c* = 2, CHCl<sub>3</sub>).

## Synthesis of compound 25

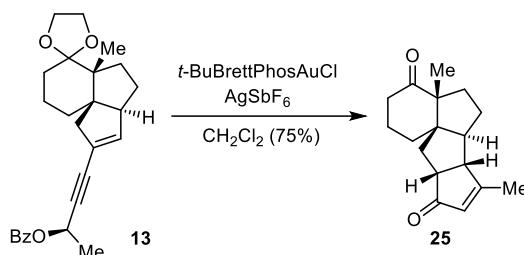

Weighing *t*-BuBrettPhosAuCl (3.46 mg, 0.00485 mmol, 5 mol%) and AgSbF<sub>6</sub> (3.33 mg, 0.0097 mmol, 10 mol%) into 10 mL round-bottom flask. 1 mL wet DCM was added. The mixture was stirred at room temperature for 10 min and a solution of **13** (40 mg, 0.0984 mmol) in 1 mL wet DCM was added. Subsequently, the mixture was stirred at room temperature until the reaction was completed monitored by TLC, the reaction mixture was concentrated *in vacuo* and purified by flash chromatography (EtOAc / petroleum ether = 1 / 5) to afford **25** (19 mg, 0.073 mmol, 75%) as a colorless solid.

**R<sub>f</sub>** = 0.24 (silica, EtOAc: petroleum ether = 1: 5, stains with PMA);

**Mp** 112.6 – 114.4 °C;

**<sup>1</sup>H NMR (500 MHz, Chloroform-*d*)**  $\delta$  5.83 (t, *J* = 1.5 Hz, 1H), 3.03 (d, *J* = 6.2 Hz, 1H), 2.92 (ddd, *J* = 11.1, 6.2, 1.5 Hz, 1H), 2.50 – 2.43 (m, 2H), 2.23 – 2.16 (m, 2H), 2.11 (s, 3H), 2.06 – 2.01 (m, 1H), 1.85 – 1.82 (m, 1H), 1.79 (dq, *J* = 6.6, 3.5 Hz, 1H), 1.71 – 1.63 (m, 2H), 1.54 (tt, *J* = 13.4, 4.1 Hz, 1H), 1.44 – 1.37 (m, 2H), 1.33–1.26 (m, 1H), 1.11 (s, 3H);

**<sup>13</sup>C NMR (125 MHz, Chloroform-*d*)**  $\delta$  214.4, 212.6, 181.1, 130.3, 61.9, 60.4, 60.0, 51.4, 43.9, 38.1, 38.0, 31.5, 30.7, 30.5, 22.7, 19.5, 18.1;

**HRMS ESI** calcd for C<sub>17</sub>H<sub>22</sub>O<sub>2</sub>Na [M+Na]<sup>+</sup> 281.1512, found 281.1511;

**IR (neat)**  $\nu_{\text{max}}$  2947, 2876, 1699, 1614, 1456, 1313, 1271, 1113, 716 cm<sup>-1</sup>;

$[\alpha]_{\text{D}}^{20} = -30.2$  (*c* = 1, CHCl<sub>3</sub>).

### Synthesis of compound 11

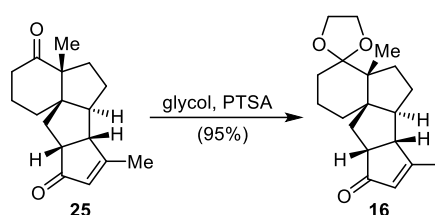

To a stirred solution of **25** (94 mg, 0.364 mmol) in benzene (3.6 mL) were added ethylene glycol (0.2 mL, 3.640 mmol) and PTSA (6.9 mg, 0.036 mmol) at room temperature. Then the reaction mixture was heated to 80 °C. After 9 h, the reaction mixture was quenched with saturated aqueous NaHCO<sub>3</sub> and extracted with EtOAc (3 × 10 mL). The combined organic layer was washed with brine, dried over anhydrous Na<sub>2</sub>SO<sub>4</sub> and concentrated *in vacuo*. The residue was purified by flash column chromatography (EtOAc / petroleum ether = 1 / 8) to produce **16** (104 mg, 0.34 mmol, 95%) as a colorless oil.

**R<sub>f</sub>** = 0.22 (silica, EtOAc: petroleum ether = 1: 8, stains with PMA);

**<sup>1</sup>H NMR (400 MHz, Chloroform-*d*)**  $\delta$  5.81 (s, 1H), 3.96 – 3.88 (m, 4H), 3.04 (d, *J* = 5.9 Hz, 1H), 2.89 – 2.85 (m, 1H), 2.62 (t, *J* = 8.8 Hz, 1H), 2.15 (s, 3H), 2.02 (t, *J* = 12.1 Hz, 1H), 1.74 (t, *J* = 10.1 Hz, 1H), 1.64 (d, *J* = 13.7 Hz, 1H), 1.50 (s, 1H), 1.45 – 1.35 (m, 5H), 1.31 – 1.28 (m, 1H), 1.22 – 1.13 (m, 2H), 1.01 (s, 3H);

**<sup>13</sup>C NMR (100 MHz, Chloroform-*d*)**  $\delta$  213.6, 182.0, 130.4, 113.0, 65.0, 63.9, 59.7, 59.6, 53.4, 50.9, 44.6, 39.1, 33.0, 32.0, 31.7, 30.3, 19.7, 18.5, 18.2;

**HRMS ESI** calcd for C<sub>19</sub>H<sub>26</sub>O<sub>3</sub>Na [M+Na]<sup>+</sup> 325.1774, found 325.1771;

**IR (neat)**  $\nu_{\text{max}}$  2946, 2880, 1692, 1616, 1463, 1437, 1376, 1191, 1139, 1119, 1035 cm<sup>-1</sup>;

$[\alpha]_{\text{D}}^{20} = -49.9$  (*c* = 1, CHCl<sub>3</sub>).

### Synthesis of compound 24

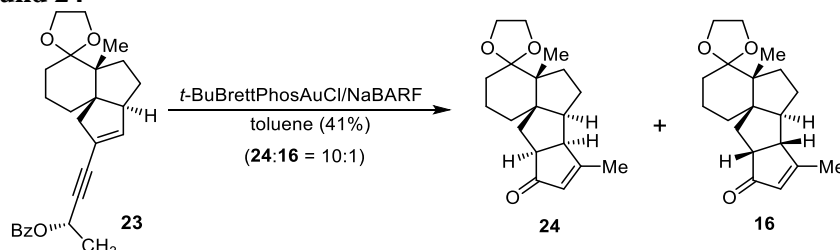

Weighing *t*-BuBrettPhosAuCl (3.48 mg, 0.00487 mmol, 5 mol%) and NaBARF (4.31 mg, 0.00487 mmol, 5 mol%) into 10 mL round-bottom flask. Later, 1.5 mL toluene was added. The mixture was stirred at room temperature for 10 mins and a solution of **23** (39.6 mg, 0.0974 mmol) in 1.5 mL toluene was added. Subsequently, the mixture was stirred at room temperature until the reaction was completed monitored by TLC, the reaction mixture was concentrated *in vacuo* and purified by flash chromatography (EtOAc / petroleum ether = 1 / 8) to afford a mixture of **24** and **16** (24:**16** = 10:1, 12.3 mg, 0.041 mmol, 41%) as a colorless oil.

$R_f$  = 0.23 (silica, EtOAc: petroleum ether = 1: 8, stains with PMA);

$^1\text{H NMR}$  (400 MHz, Chloroform-*d*)  $\delta$  5.77 (s, 1H), 4.00 – 3.89 (m, 4H), 3.38 (t,  $J$  = 7.6 Hz, 1H), 2.88 (dd,  $J$  = 17.0, 9.6 Hz, 1H), 2.80 (dd,  $J$  = 18.0, 8.8 Hz, 1H), 2.03 (s, 3H), 1.76 (ddd,  $J$  = 13.5, 10.2, 3.4 Hz, 1H), 1.64 – 1.52 (m, 4H), 1.54 – 1.47 (m, 4H), 1.38 – 1.28 (m, 3H), 1.03 (s, 3H);

$^{13}\text{C NMR}$  (100 MHz, Chloroform-*d*)  $\delta$  213.4, 179.9, 129.9, 112.9, 65.1, 63.9, 63.8, 54.4, 52.2, 50.6, 44.0, 36.3, 31.5, 30.3, 29.1, 24.4, 19.4, 18.9, 18.8;

HRMS ESI calcd for  $\text{C}_{19}\text{H}_{26}\text{O}_3\text{Na}$   $[\text{M}+\text{Na}]^+$  325.1774, found 325.1773;

IR (neat)  $\nu_{\text{max}}$  2944, 2874, 1696, 1616, 1456, 1376, 1190, 1129, 1045  $\text{cm}^{-1}$ ;

$[\alpha]_D^{20} = -20.9$  ( $c = 2$ ,  $\text{CHCl}_3$ ).

### Synthesis of compound **42**

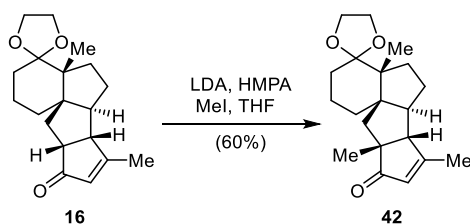

To a stirred solution of diisopropylamine (85.6  $\mu\text{L}$ , 0.576 mmol) in anhydrous THF (1.15 mL) at  $-78^\circ\text{C}$  under argon was added *n*-BuLi (0.36 mL, 0.576 mmol, 1.6 M in hexane) and the solution was stirred at  $-78^\circ\text{C}$  for 40 min. Then the freshly prepared LDA was added a solution of **16** (29 mg, 0.096 mmol) in anhydrous THF (1.15 mL). After being stirred at  $0^\circ\text{C}$  for an hour, HMPA (0.12 mL, 0.691 mmol) and MeI (0.076 mL, 1.200 mmol) were added to the reaction mixture. Then the mixture was warmed up to  $25^\circ\text{C}$  and stirred for 2 hours. The reaction was quenched by saturated  $\text{NH}_4\text{Cl}$  aqueous solution and extracted with EtOAc ( $3 \times 5$  mL). The combined organic extract was washed with saturated  $\text{NaHCO}_3$  aqueous solution and brine, dried over anhydrous  $\text{Na}_2\text{SO}_4$  and concentrated *in vacuo*. The crude product was purified via flash chromatography (EtOAc: petroleum ether = 1 / 8) to provide **42** (18.2 mg, 0.058 mmol, 60%) as a colorless oil.

$R_f$  = 0.27 (silica, EtOAc: petroleum ether = 1: 8, stains with PMA);

$^1\text{H NMR}$  (400 MHz, Chloroform-*d*)  $\delta$  5.80 (s, 1H), 3.95 – 3.87 (m, 4H), 2.64 – 2.59 (m, 2H), 2.15 (s, 3H), 2.03 (t,  $J$  = 10.6 Hz, 1H), 1.74 (t,  $J$  = 8.9 Hz, 1H), 1.64 (d,  $J$  = 13.2 Hz, 2H), 1.59 (s, 2H), 1.49 – 1.35 (m, 6H), 1.22 (s, 3H), 0.99 (s, 3H);

$^{13}\text{C NMR}$  (100 MHz, Chloroform-*d*)  $\delta$  215.4, 180.5, 129.1, 113.0, 67.0, 65.0, 63.8, 59.9, 55.5, 53.6, 47.6, 44.5, 33.5, 31.7, 30.8, 30.3, 25.3, 19.5, 18.4, 18.2;

HRMS ESI calcd for  $\text{C}_{20}\text{H}_{28}\text{O}_3\text{Na}$   $[\text{M}+\text{Na}]^+$  339.1931, found 339.1930;

IR (neat)  $\nu_{\text{max}}$  2952, 2869, 1703, 1618, 1464, 1140, 1072  $\text{cm}^{-1}$ ;

$[\alpha]_D^{20} = -22.8$  ( $c = 1$ ,  $\text{CHCl}_3$ ).

## Synthesis of compound 43

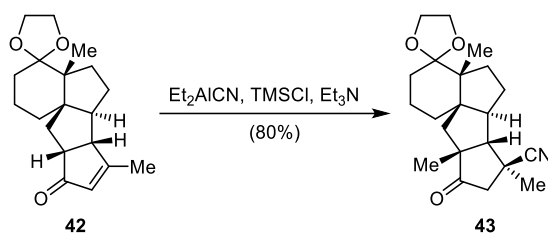

**Preparation of Nagata reagent:** To a solution of  $\text{Et}_3\text{Al}$  (1.01 mL, 1.0 M in toluene, 1.01 mmol) was added  $\text{TMSCN}$  (125  $\mu\text{L}$ , 1.01 mmol) at  $0^\circ\text{C}$ . Then the solution was heated to  $110^\circ\text{C}$ . After 1 h, the formed Nagata reagent was cooled down to room temperature and used for next step.

To a stirred solution of **42** (64 mg, 0.202 mmol) in dry THF (3.1 mL) was added above  $\text{Et}_2\text{AlCN}$  (1.01 mL, 1.0 M in toluene, 1.01 mmol) at room temperature. After 15 min,  $\text{Et}_3\text{N}$  (0.084 mL, 0.606 mmol) was added, followed by  $\text{TMSCl}$  (0.052 mL, 0.606 mmol). After overnight, the reaction was quenched by saturated  $\text{NaHCO}_3$  and diluted with *t*-BuOMe ( $3 \times 15$  mL). The combined organic extract was washed with saturated brine, dried over anhydrous  $\text{Na}_2\text{SO}_4$  and concentrated *in vacuo*. The crude product was purified via flash chromatography (EtOAc / petroleum ether = 1 / 8) to provide **43** (55.5 mg, 0.16 mmol, 80%) as a colorless oil.

$R_f$  = 0.20 (silica, EtOAc: petroleum ether = 1: 8, stains with PMA);

$^1\text{H NMR}$  (400 MHz, Chloroform-*d*)  $\delta$  3.90 – 3.80 (m, 4H), 2.85 (d,  $J$  = 19.5, 1H), 2.41 (d,  $J$  = 10.0 Hz, 1H), 2.31 (d,  $J$  = 19.5 Hz, 1H), 2.07 (q,  $J$  = 11.2, 1H), 1.98 – 1.88 (m, 3H), 1.71 (td,  $J$  = 9.6, 5.1 Hz, 1H), 1.66 – 1.54 (m, 3H), 1.49 – 1.39 (m, 7H), 1.34 – 1.27 (m, 4H), 0.93 (s, 3H);

$^{13}\text{C NMR}$  (100 MHz, Chloroform-*d*)  $\delta$  219.4, 125.8, 112.5, 65.1, 65.0, 64.8, 62.8, 57.5, 56.8, 50.7, 46.0, 42.9, 39.0, 37.8, 33.2, 30.1, 29.4, 23.4, 22.6, 21.4, 17.5;

**HRMS ESI** calcd for  $\text{C}_{21}\text{H}_{29}\text{NO}_3\text{Na}$   $[\text{M}+\text{Na}]^+$  366.2040, found 366.2039;

**IR** (neat)  $\nu_{\text{max}}$  2930, 2878, 1739, 1634, 1128, 1069  $\text{cm}^{-1}$ ;

$[\alpha]_D^{20} = -71.59$  ( $c = 1$ ,  $\text{CHCl}_3$ ).

## Synthesis of compound 44 and 45

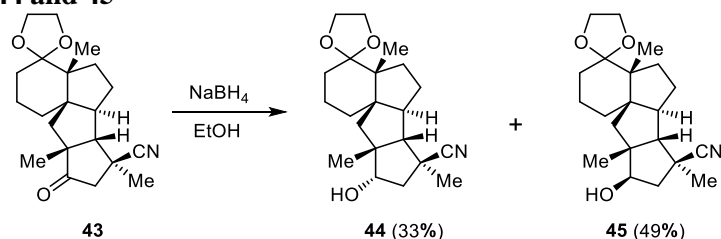

| Entry | Conditions                | Ratio | Yield (%) <sup>a</sup>        |
|-------|---------------------------|-------|-------------------------------|
| 1     | MeOH, rt                  | 1.4:1 | 44% <b>44</b> , 33% <b>45</b> |
| 2     | MeOH, $0^\circ\text{C}$   | 4:1   | 60% <b>44</b> , 15% <b>45</b> |
| 3     | MeOH, $40^\circ\text{C}$  | 1.6:1 | 42% <b>44</b> , 26% <b>45</b> |
| 4     | EtOH, $-20^\circ\text{C}$ | 1:1.5 | 33% <b>44</b> , 49% <b>45</b> |

<sup>a</sup>Isolated yield

To a stirred solution of compound **43** (34.5 mg, 0.10 mmol) in EtOH (3 mL) at room temperature was added  $\text{NaBH}_4$  (11.3 mg, 0.30 mmol). The reaction mixture stirred at  $-20^\circ\text{C}$  for 3 h before being quenched with  $\text{H}_2\text{O}$ . The aqueous layer was extracted with EtOAc ( $3 \times 10$  mL). Subsequently, the combined organic layers were washed

with brine and dried over anhydrous  $\text{Na}_2\text{SO}_4$ . The solvent was removed under reduced pressure and purified by flash column chromatography on silica gel (EtOAc / petroleum ether = 1 / 3) to afford product **44** (11.9 mg, 0.034 mmol, 33%) and **45** (16.6 mg, 0.048 mmol, 49%) as a colorless solid.

**Data for 44:**

$R_f$  = 0.32 (silica, EtOAc: petroleum ether = 1: 1, stains with PMA);

**Mp** 134.8 – 135.9 °C;

**$^1\text{H}$  NMR (400 MHz, Chloroform-*d*)**  $\delta$  4.15 (q,  $J$  = 8.0 Hz, 1H), 3.96 – 3.90 (m, 4H), 2.31 – 2.28 (m, 1H), 2.23 (dd,  $J$  = 15.6, 8.6 Hz, 2H), 2.17 – 2.09 (m, 2H), 2.02 (dd,  $J$  = 10.2, 5.0 Hz, 1H), 1.94 (d,  $J$  = 14.5 Hz, 2H), 1.69 – 1.66 (m, 1H), 1.63 – 1.59 (m, 3H), 1.52 – 1.49 (m, 5H), 1.39 (s, 3H), 1.22 (s, 3H), 0.99 (s, 3H);

**$^{13}\text{C}$  NMR (100 MHz, Chloroform-*d*)**  $\delta$  127.7, 112.7, 78.9, 68.1, 65.0, 64.7, 59.0, 58.4, 56.6, 51.1, 45.6, 43.0, 41.0, 38.0, 34.4, 30.3, 29.3, 23.9, 21.6, 19.2, 17.6;

**HRMS ESI** calcd for  $\text{C}_{21}\text{H}_{31}\text{NO}_3\text{Na}$   $[\text{M}+\text{Na}]^+$  368.2196, found 368.2195;

**IR (neat)**  $\nu_{\text{max}}$  2928, 2869, 2232, 1456, 1336, 1080, 1040, 750  $\text{cm}^{-1}$ ;

$[\alpha]_{\text{D}}^{20}$  = – 6.7 ( $c$  = 1,  $\text{CHCl}_3$ ).

**Data for 45:**

$R_f$  = 0.41 (silica, EtOAc: petroleum ether = 1: 1, stains with PMA);

**Mp** 192.5 – 194.3 °C;

**$^1\text{H}$  NMR (400 MHz, Chloroform-*d*)**  $\delta$  3.94 (m, 5H), 2.59 (dd,  $J$  = 14.0, 6.6 Hz, 1H), 2.24 (d,  $J$  = 9.7 Hz, 1H), 2.15 (td,  $J$  = 11.4, 8.9 Hz, 1H), 2.07 – 2.02 (m, 1H), 1.96 (dd,  $J$  = 13.0, 9.2 Hz, 1H), 1.86 (d,  $J$  = 2.0 Hz, 2H), 1.77 (dd,  $J$  = 14.0, 6.5 Hz, 1H), 1.71 – 1.64 (m, 3H), 1.58 – 1.50 (m, 5H), 1.44 – 1.39 (m, 4H), 1.32 (s, 3H), 1.03 (s, 3H);

**$^{13}\text{C}$  NMR (100 MHz, Chloroform-*d*)**  $\delta$  127.1, 113.0, 80.0, 69.8, 65.0, 64.7, 59.3, 58.8, 56.8, 51.2, 46.6, 40.6, 38.0, 37.2, 36.7, 30.5, 29.8, 28.3, 22.6, 21.7, 17.8;

**HRMS ESI** calcd for  $\text{C}_{21}\text{H}_{31}\text{NO}_3\text{Na}$   $[\text{M}+\text{Na}]^+$  368.2196, found 368.2197;

**IR (neat)**  $\nu_{\text{max}}$  2939, 2191, 1456, 1256, 1077, 1046, 732  $\text{cm}^{-1}$ ;

$[\alpha]_{\text{D}}^{20}$  = – 5.2 ( $c$  = 2,  $\text{CHCl}_3$ ).

**Recycle compound 43 from 44**

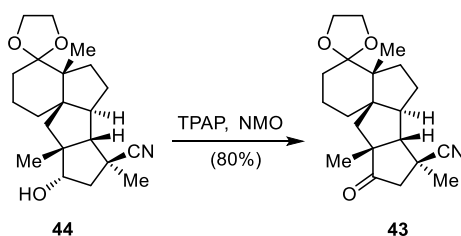

To a stirred solution of compound **44** (20 mg, 0.058 mmol) in dry  $\text{CH}_2\text{Cl}_2$  (4 mL) was added 4Å MS (20 mg), followed by NMO (27.1 mg, 0.232 mmol) and TPAP (6.1 mg, 0.017 mmol). After 40 min, the reaction mixture was purified directly by flash chromatography (EtOAc / petroleum ether = 1 / 8) to afford product **43** (15.9 mg, 0.046 mmol, 80%) as a colorless oil.

## Synthesis of ester 46

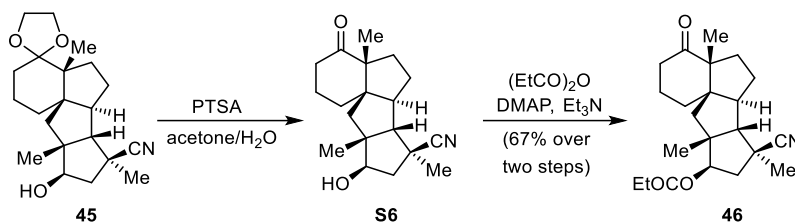

A solution of compound **45** (35 mg, 0.102 mmol) in acetone/H<sub>2</sub>O (2 mL / 2 mL) was added PTSA (17.5 mg, 0.102 mmol). The reaction mixture was heated to 40 °C. After 60 min, the reaction mixture was quenched with saturated aqueous NaHCO<sub>3</sub> and extracted with EtOAc (3 × 8 mL). Then the combined organic layer was dried over anhydrous Na<sub>2</sub>SO<sub>4</sub>, concentrated *in vacuo* and purified by flash chromatography (EtOAc / petroleum ether = 1 / 8) to afford **S6**.

To a solution of compound **S6** (25 mg, 0.083 mmol) in dry DCM (3 mL) was added DMAP (1 mg, 0.0083 mmol), Et<sub>3</sub>N (30 μL, 0.207 mmol), (EtCO)<sub>2</sub>O (15 μL, 0.166 mmol) under argon. Then the resulting mixture was stirred at ambient temperature for 2 h. After completing the reaction, the mixture was quenched by H<sub>2</sub>O (10 mL) and diluted with DCM (3 × 8 mL). The combined organic layers were washed with brine (20 mL), dried over anhydrous Na<sub>2</sub>SO<sub>4</sub> and concentrated under reduced pressure. Afterwards, the residue was purified through silica gel flash column chromatography (EtOAc / petroleum ether = 1 / 3) to yield compound **46** (24.2 mg, 0.067 mmol, 67% for two steps) as a colorless oil.

**R<sub>f</sub>** = 0.29 (silica, EtOAc: petroleum ether = 1: 3, stains with PMA);

**<sup>1</sup>H NMR (400 MHz, Chloroform-*d*)** δ 5.16 – 5.13 (m, 1H), 2.40 – 2.34 (m, 5H), 2.27 (d, *J* = 5.5 Hz, 1H), 2.23 (d, *J* = 10.3 Hz, 1H), 2.18 – 2.13 (m, 1H), 1.87 – 1.76 (m, 6H), 1.74 – 1.66 (m, 1H), 1.61 (s, 1H), 1.48 – 1.37 (m, 5H), 1.29 (s, 3H), 1.15 (t, *J* = 7.5 Hz, 3H), 1.11 (s, 3H);

**<sup>13</sup>C NMR (100 MHz, Chloroform-*d*)** δ 215.2, 174.4, 126.4, 79.7, 69.3, 60.1, 59.0, 57.2, 52.4, 48.0, 43.7, 38.2, 37.1, 36.9, 36.3, 32.0, 27.7, 23.1, 22.6, 22.4, 20.0, 9.1;

**HRMS ESI** calcd for C<sub>22</sub>H<sub>32</sub>NO<sub>3</sub> [M+H]<sup>+</sup> 358.2377 found 358.2371;

**IR (neat)** V<sub>max</sub> 2932, 2866, 2232, 1701, 1629, 1187, 1078, 1028, 803 cm<sup>-1</sup>;

**[α]<sub>D</sub><sup>20</sup>** = – 11.9 (*c* = 1, CHCl<sub>3</sub>).

## Synthesis of compound S8

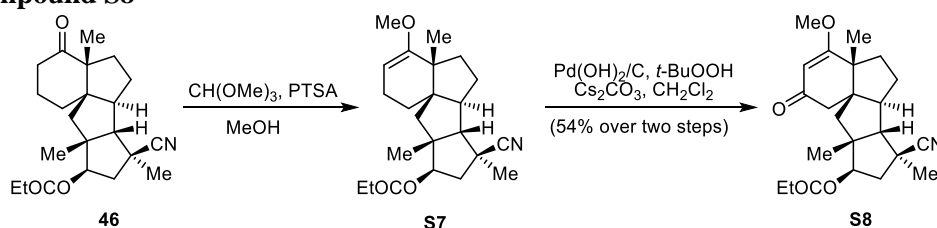

To a stirred solution of compound **46** (13.6 mg, 0.038 mmol) in anhydrous MeOH (2 mL) at room temperature was added CH(OMe)<sub>3</sub> (67.4 μL, 0.646 mmol) and PTSA (5.42 mg, 0.028 mmol). The mixture was refluxed for 2 hours. After cooled to room temperature, the reaction mixture was diluted with saturated NaHCO<sub>3</sub> aqueous solution. The aqueous layer was extracted with EtOAc (3 × 8 mL). Subsequently, the combined organic layer was washed with saturated NaHCO<sub>3</sub> aqueous solution and brine, dried over anhydrous Na<sub>2</sub>SO<sub>4</sub> and concentrated *in vacuo*. The

crude product was purified via flash chromatography (EtOAc / petroleum ether = 1 / 8) to provide **S7** as a colorless oil which was directly used for next step.

To a stirred solution of above compound **S7** (10 mg, 0.027 mmol) in anhydrous CH<sub>2</sub>Cl<sub>2</sub> (1.5 mL) at 25 °C was added 20% Pd(OH)<sub>2</sub>/C (4 mg), Cs<sub>2</sub>CO<sub>3</sub> (44 mg, 0.135 mmol) and *t*-BuO<sub>2</sub>H (25 μL, 0.135 mmol, 5.5 M in decane). After stirred at 25 °C for 19 hours, 20% Pd(OH)<sub>2</sub>/C (4 mg), Cs<sub>2</sub>CO<sub>3</sub> (44 mg, 0.135 mmol.) and *t*-BuO<sub>2</sub>H (25 μL, 0.135 mmol, 5.5 M in decane) was added to the reaction and stirred at 25 °C for 8 hours, the reaction mixture was filtered through a plug of Celite. Then the filtrate was concentrated *in vacuo*. The crude product was purified via flash chromatography (EtOAc / petroleum ether = 1 / 1) to give **S8** (7.9 mg, 0.020 mmol, 54% for two steps) as a colorless oil.

**R<sub>f</sub>** = 0.27 (silica, EtOAc: petroleum ether = 1:1, stains with PMA);

**<sup>1</sup>H NMR (500 MHz, Chloroform-*d*)** δ 5.38 (s, 1H), 5.12 (dd, *J* = 7.5, 2.6 Hz, 1H), 3.68 (s, 3H), 2.57 (d, *J* = 16.4 Hz, 1H), 2.48 (d, *J* = 16.4 Hz, 1H), 2.38 (q, *J* = 7.7 Hz, 2H), 2.28 (d, *J* = 14.8 Hz, 1H), 2.21 – 2.15 (m, 3H), 2.09 (dd, *J* = 8.9, 5.8 Hz, 1H), 1.87 (s, 2H), 1.58 (s, 3H), 1.41 (s, 3H), 1.30 (s, 3H), 1.21 (s, 3H), 1.16 (t, *J* = 7.6 Hz, 3H);

**<sup>13</sup>C NMR (126 MHz, Chloroform-*d*)** δ 197.2, 181.3, 174.2, 126.0, 102.5, 80.3, 71.0, 56.7, 56.3, 56.0, 51.8, 50.8, 49.4, 45.3, 44.3, 38.9, 34.4, 33.3, 27.7, 24.1, 22.5, 18.0, 9.1;

**HRMS ESI** calcd for C<sub>23</sub>H<sub>32</sub>NO<sub>4</sub> [M+H]<sup>+</sup> 386.2326, found 386.2329;

**IR (neat)** V<sub>max</sub> 2928, 2861, 2234, 1797, 1735, 1659, 1600, 1456, 1363, 1237, 1028, 752 cm<sup>-1</sup>;

**[α]<sub>D</sub><sup>20</sup>** = -12,2 (*c* = 1, CHCl<sub>3</sub>).

### Synthesis of compound 12β-hydroxy Conidiogenone C

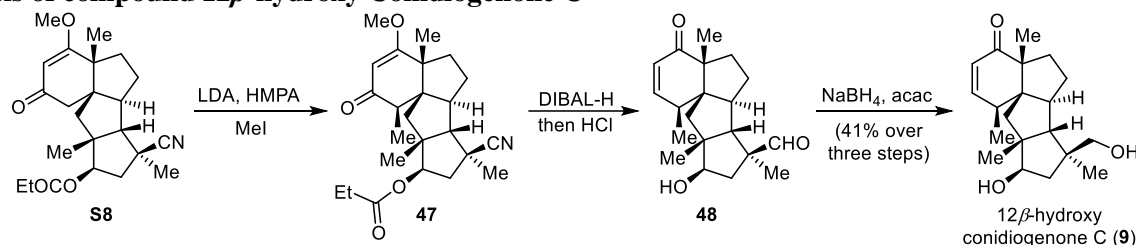

To a stirred solution of diisopropylamine (71 μL, 0.48 mmol) in anhydrous THF (1.3 mL) at -78 °C under argon was added *n*-BuLi (300 μL, 0.48 mmol, 1.6 M in hexane) and the solution was stirred at -78 °C for 40 mins. Then the freshly prepared LDA was added a solution of compound **S8** (10 mg, 0.027 mmol) in anhydrous THF (1.3 mL). After stirred at 0°C for an hour, HMPA (90 μL, 0.513 mmol) and MeI (87 μL, 1.37 mmol) was added to the reaction mixture. Then the mixture was warmed up to 25 °C and stirred for 2 hours. The reaction was quenched by saturated NH<sub>4</sub>Cl aqueous solution and extracted with EtOAc (3 × 5 mL). The combined organic layers were washed with saturated NaHCO<sub>3</sub> aqueous solution and brine, dried over anhydrous Na<sub>2</sub>SO<sub>4</sub> and concentrated *in vacuo*. The crude product was purified via flash chromatography (EtOAc / petroleum ether = 1 / 1) to provide **47** as a colorless oil.

To a stirred solution of above compound **47** (7 mg, 0.018 mmol) in dry toluene (1.5 mL) at -78 °C was added DIBAL-H (90 μL, 0.090 mmol, 1.0 M solution in toluene). After stirred at -78 °C for 30 min, the reaction mixture was quenched by 1N HCl (2 mL) and stirred for 2 h at ambient temperature. Then the aqueous layer was extracted

with *t*-BuOMe (3 × 10 mL). The combined organic layers were washed with brine, dried over anhydrous Na<sub>2</sub>SO<sub>4</sub>, concentrated *in vacuo* and purified with flash chromatography (EtOAc / petroleum ether = 1 / 3) to afford crude aldehyde which was directly used for the next step.

To a stirred solution of aldehyde **48** (4.2 mg, 0.0132 mmol) in dry THF (1 mL) at 0 °C was added NaBH<sub>4</sub>·acac (7.4 mg, 0.0538 mmol). After being stirred at 0 °C for 10 min, the reaction mixture was quenched by H<sub>2</sub>O. The aqueous layer was extracted with EtOAc (3 × 5 mL). Later, the combined organic layers were washed with brine, dried over anhydrous Na<sub>2</sub>SO<sub>4</sub>, concentrated *in vacuo* and purified with flash chromatography (EtOAc / petroleum ether = 1 / 3) to afford 12β-hydroxy Conidiogenone C (**9**) (3.3 mg, 0.0104 mmol, 41% for three steps).

**R<sub>f</sub>** = 0.22 (silica, EtOAc: petroleum ether = 2:1, stains with PMA);

**Mp** 80.3 – 82.2 °C;

**<sup>1</sup>H NMR (500 MHz, Methanol-*d*<sub>4</sub>)** δ 7.08 (dd, *J* = 9.9, 5.3 Hz, 1H), 5.95 (d, *J* = 10.0 Hz, 1H), 4.11 (dd, *J* = 10.5, 7.1 Hz, 1H), 3.31– 3.25 (m, 2H), 2.82 (p, *J* = 6.2 Hz, 1H), 2.42 – 2.39 (m, 1H), 2.22 (d, *J* = 14.9 Hz, 1H), 2.09 – 2.05 (m, 1H), 1.77 – 1.71 (m, 3H), 1.64 – 1.59 (m, 2H), 1.48 (d, *J* = 15.0 Hz, 1H), 1.29 (d, *J* = 7.1 Hz, 4H), 1.20 (s, 3H), 1.07 (s, 3H), 0.99 (s, 3H);

**<sup>13</sup>C NMR (125 MHz, Methanol-*d*<sub>4</sub>)** δ 208.0, 157.1, 127.9, 77.7, 73.9, 68.2, 62.1, 58.8, 57.0, 55.4, 45.3, 43.1, 42.3, 40.1, 39.8, 35.0, 24.5, 22.7, 21.5, 18.7;

**HRMS ESI** calcd for C<sub>20</sub>H<sub>30</sub>O<sub>3</sub>Na [M+Na]<sup>+</sup> 341.2087, found 341.2090;

**IR (neat)** V<sub>max</sub> 2929, 2863, 1454, 1262, 1090, 1027, 802 cm<sup>-1</sup>;

**[α]<sub>D</sub><sup>20</sup>** = – 6.0 (c = 0.5, MeOH), reported **[α]<sub>D</sub><sup>25</sup>** = – 0.22 (c = 1, MeOH)<sup>[1]</sup>.



### 3.2 Total Synthesis of Conidiogenone C and K

#### Synthesis of compound S9

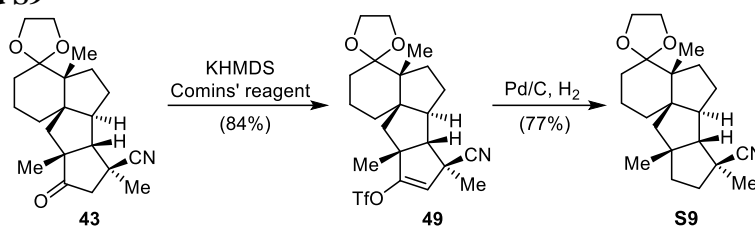

| Entry | Conditions                                                               | Yield (%) <sup>a</sup>      |
|-------|--------------------------------------------------------------------------|-----------------------------|
| 1     | N <sub>2</sub> H <sub>4</sub> ·H <sub>2</sub> O / TsNHNH <sub>2</sub>    | Decompose (form <b>43</b> ) |
| 2     | LiCl, Pd(PPh <sub>3</sub> ) <sub>4</sub> , <i>n</i> -Bu <sub>3</sub> SnH | 0 (form <b>49</b> )         |
| 3     | HCOOH, Pd(OAc) <sub>2</sub> , Et <sub>3</sub> N                          | 0 (form <b>49</b> )         |
| 4     | PtO <sub>2</sub> , H <sub>2</sub> (1 atm)                                | Decompose (form <b>49</b> ) |
| 5     | Pd/C, H <sub>2</sub> (1 atm)                                             | 77 (form <b>49</b> )        |

<sup>a</sup>Isolated yield

A solution of **43** (35 mg, 0.102 mmol) in dry THF (2 mL) at  $-78^{\circ}\text{C}$  was added dropwise the KHMDS (0.204 mL, 1.0 M solution in THF, 0.204 mmol). After 40 min, a solution of Comins' reagent (80.1 mg, 0.204 mmol) in dry THF (1.3 mL) was added. The reaction mixture was stirred at  $-78^{\circ}\text{C}$  for 2 h. Then the reaction mixture was quenched with saturated aqueous NaHCO<sub>3</sub>, extracted with EtOAc (3 × 8 mL), dried over anhydrous Na<sub>2</sub>SO<sub>4</sub> and concentrated *in vacuo*. The residue was purified by flash chromatography (EtOAc / petroleum ether = 1 / 8) to give **49**.

To a solution of the vinyl triflate **49** (34 mg, 0.071 mmol) in dry methanol (4 mL) were added 10% Pd/C (6.8 mg) as the catalyst. The mixture was hydrogenated at 1 atm of H<sub>2</sub> until the starting material disappeared on TLC. Then the catalyst was filtered off and the solvent was evaporated *in vacuo*. At last, the residue was purified by flash column chromatography on silica gel (EtOAc / petroleum ether = 1 / 8) to give product **S9** (18 mg, 0.055 mmol, 54% for two steps) as a colorless oil.

**R<sub>f</sub>** = 0.52 (silica, EtOAc: petroleum ether = 1: 8, stains with PMA);

**<sup>1</sup>H NMR (500 MHz, Benzene-*d*<sub>6</sub>)** δ 3.62 – 3.55 (m, 4H), 2.28 (d, *J* = 14.7 Hz, 1H), 2.17 – 2.11 (m, 1H), 2.08 – 2.00 (m, 2H), 1.84 (dd, *J* = 12.7, 8.1 Hz, 1H), 1.73 – 1.67 (m, 3H), 1.63 (dd, *J* = 12.8, 3.0 Hz, 2H), 1.59 – 1.54 (m, 3H), 1.51 (s, 3H), 1.48 – 1.45 (m, 2H), 1.39 (td, *J* = 13.2, 12.7, 3.7 Hz, 2H), 1.30 (dt, *J* = 11.3, 7.9 Hz, 1H), 1.13 (s, 3H), 1.07 (s, 3H);

**<sup>13</sup>C NMR (125 MHz, Benzene-*d*<sub>6</sub>)** δ 126.6, 112.5, 69.3, 64.6, 64.3, 58.2, 56.6, 55.4, 51.1, 47.9, 40.6, 40.4, 40.0, 38.0, 36.9, 30.3, 29.3, 28.9, 22.3, 21.6, 17.8;

**HRMS ESI** calcd for C<sub>21</sub>H<sub>31</sub>NO<sub>2</sub>Na [M+Na]<sup>+</sup> 352.2247, found 352.2245;

**IR (neat)**  $\nu_{\text{max}}$  2927, 2233, 1742, 1459 cm<sup>-1</sup>;

**[ $\alpha$ ]<sub>D</sub><sup>20</sup>** = 16.1 (*c* = 1, CHCl<sub>3</sub>).

## Synthesis of compound **50**

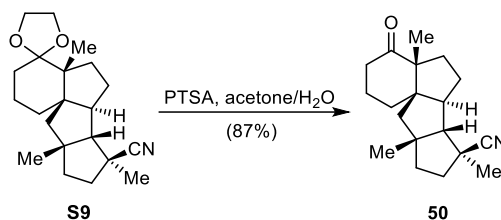

A solution of **S9** (30 mg, 0.091 mmol) in acetone/H<sub>2</sub>O (3 mL, 1/1) was added PTSA (17.3 mg, 0.091 mmol). The reaction mixture was heated to 40 °C. After 60 min, the reaction mixture was quenched with saturated aqueous NaHCO<sub>3</sub> and extracted with EtOAc (3 × 10 mL). Then the combined organic layer was dried over anhydrous Na<sub>2</sub>SO<sub>4</sub>, concentrated *in vacuo* and purified by flash chromatography (EtOAc / petroleum ether = 1 / 8) to afford compound **50** (22.6 mg, 0.079 mmol, 87%) as a colorless oil.

**R<sub>f</sub>** = 0.31 (silica, EtOAc: petroleum ether = 1: 8, stains with PMA);

**<sup>1</sup>H NMR (400 MHz, Chloroform-*d*)** δ 2.44 – 2.27 (m, 3H), 2.21 – 2.15 (m, 1H), 2.07 – 2.00 (m, 2H), 1.91 – 1.59 (m, 12H), 1.42 (s, 3H), 1.38 (s, 3H), 1.09 (s, 3H);

**<sup>13</sup>C NMR (100 MHz, Chloroform-*d*)** δ 215.5, 126.7, 70.4, 59.4, 59.3, 52.6, 52.5, 50.9, 41.3, 39.0, 38.6, 38.2, 34.7, 34.5, 32.8, 31.2, 22.2, 22.1, 19.7;

**HRMS ESI** calcd for C<sub>19</sub>H<sub>28</sub>NO [M+H]<sup>+</sup> 286.2165, found 286.2164;

**IR (neat)**  $\nu_{\text{max}}$  2934, 2868, 1701, 1456 cm<sup>-1</sup>;

**[ $\alpha$ ]<sub>D</sub><sup>20</sup>** = 12.5 (*c* = 0.5, CHCl<sub>3</sub>).

## Synthesis of compound **S11**

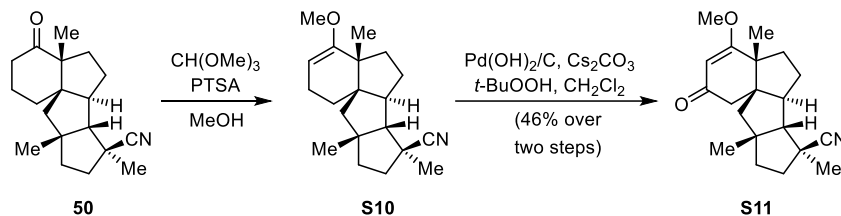

To a stirred solution of **50** (30 mg, 0.105 mmol) in anhydrous MeOH (3 mL) at room temperature was added CH(OMe)<sub>3</sub> (195 μL, 1.785 mmol) and PTSA (14 mg, 0.079 mmol). The mixture was refluxed for 2 hours. After cooled to room temperature, the reaction mixture was diluted with saturated NaHCO<sub>3</sub> aqueous solution. The aqueous layer was extracted with EtOAc (3 × 10 mL). Subsequently, the combined organic layer was washed with saturated NaHCO<sub>3</sub> aqueous solution and brine, dried over anhydrous Na<sub>2</sub>SO<sub>4</sub> and concentrated *in vacuo*. The crude product was purified via flash chromatography (EtOAc / petroleum ether = 1 / 8) to provide **S10** as a colorless oil.

To a stirred solution of compound **S10** (21.4 mg, 0.0715 mmol) in anhydrous CH<sub>2</sub>Cl<sub>2</sub> (2 mL) at 25 °C was added 20% Pd(OH)<sub>2</sub>/C (5 mg), Cs<sub>2</sub>CO<sub>3</sub> (116.5 mg, 0.357 mmol) and *t*-BuO<sub>2</sub>H (64.1 μL, 0.357 mmol, 5.5 M in decane). After stirred at 25 °C for 19 hours, 20% Pd(OH)<sub>2</sub>/C (5 mg), Cs<sub>2</sub>CO<sub>3</sub> (116.5 mg, 0.357 mmol) and *t*-BuO<sub>2</sub>H (64.1 μL, 0.357 mmol, 5.5 M in decane) was added to the reaction. After stirred at 25 °C for 8 hours, the reaction mixture was filtered through a plug of Celite. Then the filtrate was concentrated *in vacuo*. The crude product was purified via flash chromatography (EtOAc / petroleum ether = 1 / 3) to give **S11** (15 mg, 0.048 mmol, 46% for two steps) as a colorless oil.

**R<sub>f</sub>** = 0.18 (silica, EtOAc: petroleum ether = 1: 3, stains with PMA);

**<sup>1</sup>H NMR (400 MHz, Chloroform-*d*)**  $\delta$  5.38 (s, 1H), 3.67 (s, 3H), 2.52 (d,  $J = 16.5$  Hz, 1H), 2.45 (d,  $J = 16.5$  Hz, 1H), 2.17 – 2.11 (m, 1H), 2.02 – 1.95 (m, 2H), 1.91 – 1.85 (m, 2H), 1.82 – 1.73 (m, 2H), 1.60 – 1.56 (m, 5H), 1.41 (s, 3H), 1.39 (s, 3H), 1.20 (s, 3H);

**<sup>13</sup>C NMR (100 MHz, Chloroform-*d*)**  $\delta$  197.8, 181.7, 126.4, 102.5, 70.7, 56.2, 55.4, 52.7, 51.9, 51.5, 49.6, 44.4, 41.8, 38.4, 38.3, 34.1, 33.3, 31.9, 21.8, 17.8;

**HRMS ESI** calcd for C<sub>20</sub>H<sub>28</sub>NO<sub>2</sub> [M+H]<sup>+</sup> 314.2115, found 314.2114;

**IR (neat)**  $\nu_{\text{max}}$  2942, 2875, 1658, 1599, 1458, 1351, 1212 cm<sup>-1</sup>;

**$[\alpha]_{\text{D}}^{20}$**  = – 7.6 ( $c = 1$ , CHCl<sub>3</sub>).

### Synthesis of compound **S12**

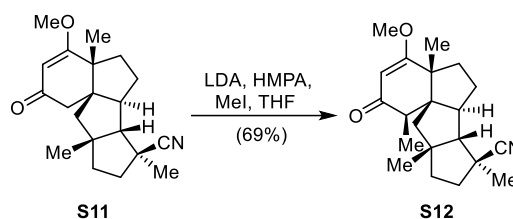

To a stirred solution of diisopropylamine (101.5  $\mu$ L, 0.682 mmol) in anhydrous THF (1.3 mL) at –78 °C under argon was added *n*-BuLi (426.3  $\mu$ L, 0.682 mmol, 1.6 M in hexane) and the solution was stirred at –78 °C for 40 min. Then the freshly prepared LDA was added a solution of **S11** (12 mg, 0.038 mmol) in anhydrous THF (1.3 mL). After stirred at 0 °C for an hour, HMPA (126.4  $\mu$ L, 0.722 mmol) and MeI (123.5  $\mu$ L, 1.93 mmol) were added to the reaction mixture. Then the mixture was warmed up to 25 °C and stirred for 2 hours. The reaction was quenched by saturated NH<sub>4</sub>Cl aqueous solution and extracted with EtOAc (3  $\times$  5 mL). The combined organic extract was washed with saturated NaHCO<sub>3</sub> aqueous solution and brine, dried over anhydrous Na<sub>2</sub>SO<sub>4</sub> and concentrated *in vacuo*. The crude product was purified via flash chromatography (EtOAc / petroleum ether = 1 / 3) to provide **S12** (8.6 mg, 0.026 mmol, 69%) as a colorless oil.

**R<sub>f</sub>** = 0.23 (silica, EtOAc: petroleum ether = 1: 3, stains with PMA);

**<sup>1</sup>H NMR (400 MHz, Chloroform-*d*)**  $\delta$  5.31 (s, 1H), 3.69 (s, 3H), 2.42 (q,  $J = 7.4$  Hz, 1H), 2.18 – 2.10 (m, 1H), 2.07 – 2.00 (m, 2H), 1.92 (s, 2H), 1.88 – 1.77 (m, 2H), 1.74 – 1.68 (m, 2H), 1.64 – 1.58 (m, 3H), 1.43 (s, 3H), 1.37 (s, 3H), 1.27 (s, 3H), 1.24 (d,  $J = 7.3$  Hz, 3H);

**<sup>13</sup>C NMR (100 MHz, Chloroform-*d*)**  $\delta$  203.2, 180.1, 126.5, 100.4, 70.0, 57.2, 56.1, 53.0, 51.8, 50.5, 48.5, 46.9, 41.6, 38.3, 37.7, 36.8, 32.8, 31.9, 21.8, 19.9, 17.0;

**HRMS ESI** calcd for C<sub>21</sub>H<sub>30</sub>NO<sub>2</sub> [M+H]<sup>+</sup> 328.2271, found 328.2271;

**IR (neat)**  $\nu_{\text{max}}$  2924, 2860, 1658, 1601, 1458, 1367, 1169, 744 cm<sup>-1</sup>;

**$[\alpha]_{\text{D}}^{20}$**  = – 18.2 ( $c = 1$ , CHCl<sub>3</sub>).

### Synthesis of compound Conidiogenone C (4)

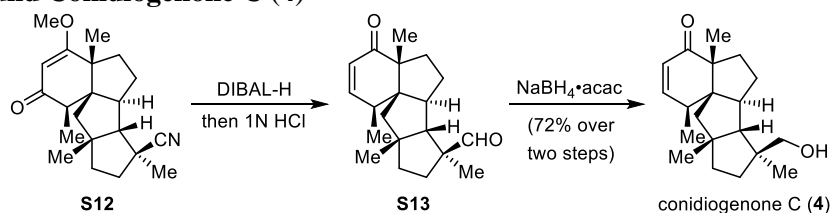

To a stirred solution of compound **S12** (10 mg, 0.031 mmol) in dry toluene (1.5 mL) at  $-78\text{ }^{\circ}\text{C}$  was added DIBAL-H (93  $\mu\text{L}$ , 0.093 mmol, 1.0 M solution in toluene). After stirred at  $-78\text{ }^{\circ}\text{C}$  for 30 min, the reaction mixture was quenched by 1N HCl (1 mL) and stirred for 2h. Then the aqueous layer was extracted with MTBE ( $3 \times 10$  mL). The combined organic layers were washed with brine, dried over anhydrous  $\text{Na}_2\text{SO}_4$ , concentrated *in vacuo* and purified with flash chromatography (EtOAc / petroleum ether = 1 / 3) to afford compound **S13**.

To a stirred solution of ester compound **S13** (7.2 mg, 0.0240 mmol) in dry THF (1 mL) at  $0\text{ }^{\circ}\text{C}$  was added  $\text{NaBH}_4 \cdot \text{acac}$  (6.6 mg, 0.048 mmol). After stirred at  $0\text{ }^{\circ}\text{C}$  for 10 min, the reaction mixture was quenched by  $\text{H}_2\text{O}$ . The aqueous layer was extracted with EtOAc ( $3 \times 5$  mL). Later, the combined organic layers were washed with brine, dried over anhydrous  $\text{Na}_2\text{SO}_4$ , concentrated *in vacuo* and purified with flash chromatography (EtOAc / petroleum ether = 1 / 3) to afford Conidiogenone C (**4**) (6.6 mg, 0.022 mmol, 72% for two steps).

$R_f = 0.29$  (silica, EtOAc: petroleum ether = 1: 3, stains with PMA);

$^1\text{H NMR}$  (400 MHz, Chloroform-*d*)  $\delta$  6.94 (dd,  $J = 10.0, 5.8$  Hz, 1H), 5.97 (dd,  $J = 10.0, 1.1$  Hz, 1H), 3.41 (d,  $J = 10.6$  Hz, 1H), 3.38 (d,  $J = 10.7$  Hz, 1H), 2.76 – 2.69 (m, 1H), 2.34 – 2.30 (m, 1H), 2.15 – 2.10 (m, 1H), 2.01 (d,  $J = 14.7$  Hz, 1H), 1.73 – 1.67 (m, 3H), 1.66 – 1.64 (m, 1H), 1.63 – 1.60 (m, 1H), 1.58 (d,  $J = 5.0$  Hz, 1H), 1.56 – 1.52 (m, 1H), 1.47 – 1.43 (m, 1H), 1.23 – 1.20 (m, 1H), 1.22 (d,  $J = 7.3$  Hz, 3H), 1.20 (s, 3H), 1.18 (s, 3H), 0.99 (s, 3H);

$^{13}\text{C NMR}$  (100 MHz, Chloroform-*d*)  $\delta$  205.7, 154.2, 127.4, 72.0, 68.2, 59.9, 57.5, 54.7, 52.8, 48.1, 46.5, 38.8, 38.4, 37.8, 36.6, 34.2, 31.1, 22.5, 21.1, 18.6;

HRMS ESI calcd for  $\text{C}_{20}\text{H}_{31}\text{O}_2$   $[\text{M}+\text{H}]^+$  303.2319, found 303.2319;

IR (neat)  $\nu_{\text{max}}$  2926, 2860, 1655, 1601, 1459, 1032  $\text{cm}^{-1}$ ;

$[\alpha]_{\text{D}}^{20} = -8.6$  ( $c = 1$ , MeOH), reported  $[\alpha]_{\text{D}}^{20} = -11.9$  ( $c = 0.04$ , MeOH) <sup>[3]</sup>.

### Synthesis of compound Conidiogenone K (8)

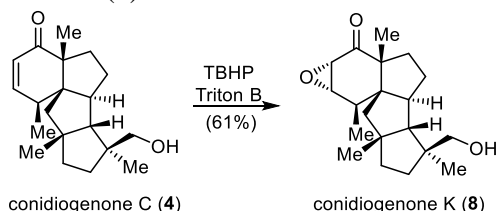

To a stirred solution of compound **4** (6 mg, 0.0198 mmol) in anhydrous THF (1 mL) at  $25\text{ }^{\circ}\text{C}$  was added Triton B (6.25  $\mu\text{L}$ , 0.0396 mmol, 40% wt in MeOH) and *t*-BuO<sub>2</sub>H (72  $\mu\text{L}$ , 0.396 mmol, 5.5 M in decane). After stirred at  $25\text{ }^{\circ}\text{C}$  for 30 min, the reaction was quenched by saturated  $\text{NH}_4\text{Cl}$  aqueous solution and extracted with EtOAc ( $3 \times 5$  mL). The combined organic extract was washed with saturated  $\text{NaHCO}_3$  aqueous solution and brine, dried over anhydrous  $\text{Na}_2\text{SO}_4$  and concentrated *in vacuo*. Finally, the crude product was purified via flash chromatography (EtOAc / petroleum ether = 1 / 3) to provide Conidiogenone K (**8**) (3.8 mg, 0.012 mmol, 61%) as a colorless oil.

**R<sub>f</sub>** = 0.31 (silica, EtOAc: petroleum ether = 1: 3, stains with PMA);

**<sup>1</sup>H NMR (400 MHz, Chloroform-*d*)** δ 3.53 (dd, *J* = 4.04 Hz, 1H), 3.41 (s, 2H), 3.33 (d, *J* = 4.2 Hz, 1H), 2.86 (dt, *J* = 8.7, 4.6 Hz, 1H), 2.65 (dq, *J* = 7.0, 3.1 Hz, 1H), 2.01 – 1.91 (m, 3H), 1.88 (d, *J* = 14.4 Hz, 1H), 1.76 (d, *J* = 14.6 Hz, 1H), 1.71 – 1.65 (m, 2H), 1.57 – 1.49 (m, 5H) 1.28 – 1.27 (m, 1H), 1.19 (s, 3H), 1.16 (s, 3H), 1.10 (s, 3H), 1.04 (d, *J* = 7.0 Hz, 3H);

**<sup>13</sup>C NMR (100 MHz, Chloroform-*d*)** δ 212.5, 72.0, 65.7, 61.2, 59.6, 56.9, 55.7, 53.5, 52.1, 48.2, 48.0, 40.1, 38.3, 36.6, 35.1, 34.1, 31.7, 22.4, 22.3, 15.2;

**HRMS ESI** calcd for C<sub>20</sub>H<sub>30</sub>O<sub>3</sub>Na [M+Na]<sup>+</sup> 341.2087, found 341.2091;

**IR (neat)** V<sub>max</sub> 2941, 2872, 1691, 1460, 1029 cm<sup>-1</sup>;

**[α]<sub>D</sub><sup>20</sup>** = – 56.6 (c = 1, MeOH), reported **[α]<sub>D</sub><sup>25</sup>** = – 30.9 (c = 0.28, MeOH)<sup>[4]</sup>.

### 3.3 Stereocontrolled cyclopentenone construction

#### General procedure

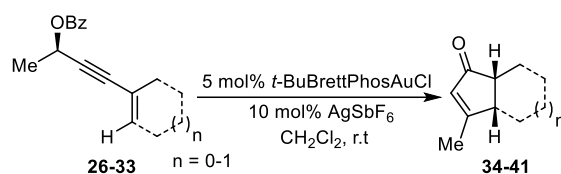

Weighing *t*-BuBrettPhosAuCl (5 mol%) and AgSbF<sub>6</sub> (10 mol%) into 10 mL round-bottom flask. wet DCM was added. The mixture was stirred at room temperature for 10 min and a solution of enynyl benzoate in wet DCM was added. Subsequently, the mixture was stirred at room temperature until the reaction was completed monitored by TLC, the reaction mixture was concentrated *in vacuo* and purified by flash chromatography to afford product.

#### Synthesis of compound 34

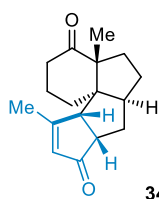

**compound 34** (42 mg) was prepared as colorless oil according to the General procedure in 74% yield.

**R<sub>f</sub>** = 0.25 (silica, EtOAc: petroleum ether = 1: 5, stains with PMA);

**<sup>1</sup>H NMR (400 MHz, Chloroform-*d*)**  $\delta$  5.91 (p, *J* = 1.3 Hz, 1H), 3.20 (d, *J* = 7.6 Hz, 1H), 3.18 – 3.11 (m, 1H), 2.61 (ddd, *J* = 13.2, 10.0, 3.1 Hz, 1H), 2.53 (td, *J* = 13.8, 6.5 Hz, 1H), 2.40 (dt, *J* = 10.9, 6.6 Hz, 1H), 2.27 (ddt, *J* = 14.0, 4.2, 2.2 Hz, 1H), 1.92 (d, *J* = 9.6 Hz, 1H), 1.90 – 1.85 (m, 2H), 1.72 – 1.65 (m, 2H), 1.63 – 1.58 (m, 2H), 1.44 (ddd, *J* = 13.5, 11.6, 7.5 Hz, 1H), 1.34 (s, 3H), 1.28 – 1.24 (m, 1H).

**<sup>13</sup>C NMR (100 MHz, Chloroform-*d*)**  $\delta$  213.6, 211.5, 176.3, 132.7, 60.8, 60.2, 56.1, 52.8, 48.7, 37.7, 30.8, 29.6, 26.8, 24.5, 22.5, 22.4, 21.4.

**HRMS ESI** calcd for C<sub>17</sub>H<sub>22</sub>O<sub>2</sub>Na [M+Na]<sup>+</sup> 281.1512, found 281.1513;

**IR (neat)**  $\nu_{\text{max}}$  2938, 1716, 1452, 1318, 1263, 1094, 713 cm<sup>-1</sup>;

**[ $\alpha$ ]<sub>D</sub><sup>20</sup>** = –14.5 (*c* = 1, CHCl<sub>3</sub>).

#### Synthesis of compound 35

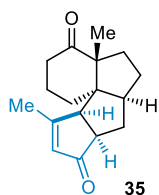

**compound 35** (23 mg) was prepared as colorless oil according to the General procedure in 75% yield.

**R<sub>f</sub>** = 0.25 (silica, EtOAc: petroleum ether = 1: 5, stains with PMA);

**<sup>1</sup>H NMR (400 MHz, Chloroform-*d*)**  $\delta$  5.91 (s, 1H), 3.21 – 3.12 (m, 2H), 2.61 (ddd, *J* = 13.3, 10.0, 3.1 Hz, 1H), 2.53 (td, *J* = 13.8, 6.6 Hz, 1H), 2.40 (dt, *J* = 10.9, 6.7 Hz, 1H), 2.27 (ddt, *J* = 14.3, 4.3, 2.1 Hz, 1H), 2.23 (s, 3H), 1.93 – 1.84 (m, 3H), 1.72 – 1.65 (m, 2H), 1.57 (dd, *J* = 13.3, 4.3 Hz, 1H), 1.42 (ddt, *J* = 19.1, 8.1, 3.7 Hz, 2H), 1.34 (s, 3H), 1.29 – 1.25 (m, 1H).

**<sup>13</sup>C NMR (100 MHz, Chloroform-*d*)**  $\delta$  213.6, 211.5, 176.4, 132.7, 60.8, 60.1, 56.1, 52.8, 48.7, 37.7, 30.8, 29.6, 26.8, 24.5, 22.5, 22.4, 21.4;

**HRMS ESI** calcd for C<sub>17</sub>H<sub>22</sub>O<sub>2</sub>Na [M+Na]<sup>+</sup> 281.1512, found 281.1512;

**IR (neat)**  $\nu_{\text{max}}$  2945, 1688, 1603, 1461, 1311, 995, 868 cm<sup>-1</sup>;

**[ $\alpha$ ]<sub>D</sub><sup>20</sup>** = –23.1 (*c* = 1, CHCl<sub>3</sub>).

### Synthesis of compound 36

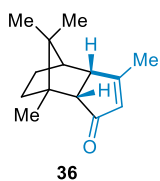

**compound 36** (75 mg) was prepared as colorless oil according to the General procedure in 73% yield.

$R_f$  = 0.15 (silica, EtOAc: petroleum ether = 1: 30, stains with PMA);

$^1\text{H NMR}$  (400 MHz, Chloroform-*d*)  $\delta$  5.82 (s, 1H), 3.18 (t,  $J$  = 6.2 Hz, 1H), 2.50 (dd,  $J$  = 7.1, 2.7 Hz, 1H), 1.99 (s, 3H), 1.92 (t,  $J$  = 4.7 Hz, 1H), 1.58 (ttd,  $J$  = 11.6, 4.8, 2.0 Hz, 1H), 1.36 (tdd,  $J$  = 12.1, 4.4, 2.8 Hz, 1H), 1.30 – 1.24 (m, 1H), 1.03 (s, 3H), 1.00 (s, 3H), 0.98 – 0.94 (m, 1H), 0.90 (s, 3H).

$^{13}\text{C NMR}$  (100 MHz, Chloroform-*d*)  $\delta$  212.0, 179.5, 132.1, 58.0, 53.2, 51.9, 49.9, 46.5, 30.8, 22.4, 19.9, 18.5, 18.4, 15.3;

HRMS ESI calcd for  $\text{C}_{14}\text{H}_{20}\text{ONa}$   $[\text{M}+\text{Na}]^+$  227.1406, found 227.1407;

IR (neat)  $\nu_{\text{max}}$  2943, 1681, 1612, 1442, 1377, 1283, 1191  $\text{cm}^{-1}$ ;

$[\alpha]_D^{20}$  = -13.4 ( $c$  = 1,  $\text{CHCl}_3$ ).

### Synthesis of compound 37

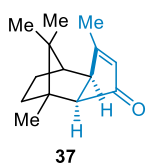

**compound 37** (64 mg) was prepared as colorless oil according to the General procedure in 70% yield.

$R_f$  = 0.15 (silica, EtOAc: petroleum ether = 1: 30, stains with PMA);

$^1\text{H NMR}$  (400 MHz, Chloroform-*d*)  $\delta$  5.84 (q,  $J$  = 2.9, 2.2 Hz, 1H), 2.61 (d,  $J$  = 6.0 Hz, 1H), 2.20 (d,  $J$  = 6.0 Hz, 1H), 2.14 (s, 3H), 2.03 (d,  $J$  = 4.4 Hz, 1H), 1.88 (ddt,  $J$  = 20.7, 12.1, 4.6 Hz, 1H), 1.56 (dd,  $J$  = 11.8, 4.0 Hz, 1H), 1.31 – 1.28 (m, 1H), 1.20 – 1.16 (m, 1H), 1.14 (s, 3H), 0.79 (s, 3H), 0.76 (s, 3H).

$^{13}\text{C NMR}$  (100 MHz, Chloroform-*d*)  $\delta$  211.7, 180.8, 133.2, 60.2, 56.4, 50.8, 48.0, 46.5, 38.1, 29.3, 23.0, 20.1, 18.1, 12.1;

HRMS ESI calcd for  $\text{C}_{14}\text{H}_{20}\text{ONa}$   $[\text{M}+\text{Na}]^+$  227.1406, found 227.1407;

IR (neat)  $\nu_{\text{max}}$  2945, 1693, 1452, 1374, 1047  $\text{cm}^{-1}$ ;

$[\alpha]_D^{20}$  = -8.5 ( $c$  = 1,  $\text{CHCl}_3$ ).

### Synthesis of compound 38

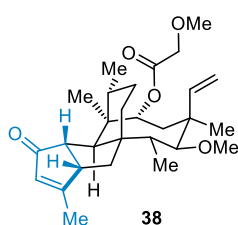

**compound 38** (15 mg) was prepared as colorless oil according to the General procedure in 59% yield.

$R_f$  = 0.21 (silica, EtOAc: petroleum ether = 1: 5, stains with PMA);

$^1\text{H NMR}$  (400 MHz, Chloroform-*d*)  $\delta$  6.32 (dd,  $J$  = 17.4, 11.1 Hz, 1H), 5.83 (s, 1H), 5.55 (d,  $J$  = 9.1 Hz, 1H), 5.22 (d,  $J$  = 11.1 Hz, 1H), 5.16 (d,  $J$  = 17.4 Hz, 1H), 3.96 (d,  $J$  = 16.3 Hz, 1H), 3.85 (d,  $J$  = 16.4 Hz, 1H), 3.42 (s, 3H), 3.39 (s, 3H), 3.12 – 3.07 (m, 2H), 2.70 (d,  $J$  = 5.9 Hz, 1H), 2.27 – 2.20 (m, 2H), 2.11 (s, 3H), 2.09 – 2.06 (m, 1H), 1.83 – 1.77 (m, 1H), 1.59 (d,  $J$  = 16.9 Hz, 1H), 1.45 (s, 3H), 1.42 – 1.33 (m, 2H), 1.28 – 1.25 (m, 2H), 1.21 (d,  $J$  = 6.8 Hz, 1H), 1.16 (s, 3H), 1.12 – 1.04 (m, 1H), 0.83 (d,  $J$  = 7.1 Hz, 3H), 0.68 (d,  $J$  = 7.0 Hz, 3H).

$^{13}\text{C}$  NMR (100 MHz, Chloroform-*d*)  $\delta$  211.7, 179.9, 168.8, 140.3, 131.2, 115.7, 86.3, 71.1, 70.5, 61.2, 59.4, 54.4, 53.8, 47.8, 47.3, 45.6, 45.2, 41.5, 37.3, 35.3, 33.8, 32.1, 27.5, 26.7, 18.0, 17.4, 16.4, 11.9;

HRMS ESI calcd for  $\text{C}_{28}\text{H}_{42}\text{O}_5\text{Na}$   $[\text{M}+\text{Na}]^+$  481.2925, found 481.2927;

IR (neat)  $\nu_{\text{max}}$  2936, 1740, 1692, 1456, 1371, 1201, 1120  $\text{cm}^{-1}$ ;

$[\alpha]_{\text{D}}^{20} = -36.5$  ( $c = 1$ ,  $\text{CHCl}_3$ ).

### Synthesis of compound 39

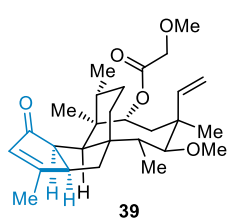

compound 39 (18 mg) was prepared as colorless oil according to the General procedure in 62% yield.

$R_f = 0.21$  (silica, EtOAc: petroleum ether = 1: 5, stains with PMA);

$^1\text{H}$  NMR (400 MHz, Chloroform-*d*)  $\delta$  6.32 (dd,  $J = 17.5, 11.2$  Hz, 1H), 5.82 (s, 1H), 5.55 (d,  $J = 9.1$  Hz, 1H), 5.22 (dd,  $J = 11.1, 1.6$  Hz, 1H), 5.16 (dd,  $J = 17.4, 1.6$  Hz, 1H), 3.96 (d,

$J = 16.3$  Hz, 1H), 3.85 (d,  $J = 16.3$  Hz, 1H), 3.42 (s, 3H), 3.39 (s, 3H), 3.11 – 3.06 (m, 2H), 2.96 (s, 1H), 2.88 (s, 1H), 2.70 (d,  $J = 5.9$  Hz, 1H), 2.24 (t,  $J = 6.4$  Hz, 2H), 2.11 (s, 3H), 2.09 – 2.05 (m, 1H), 1.59 (s, 2H), 1.45 (s, 3H), 1.42 – 1.39 (m, 2H), 1.26 (d,  $J = 3.7$  Hz, 2H), 1.16 (s, 3H), 0.83 (d,  $J = 7.2$  Hz, 3H), 0.68 (d,  $J = 7.0$  Hz, 3H).

$^{13}\text{C}$  NMR (100 MHz, Chloroform-*d*)  $\delta$  211.7, 179.9, 168.8, 140.3, 131.2, 115.7, 86.3, 71.1, 70.5, 61.2, 59.4, 54.4, 53.8, 47.8, 47.3, 45.6, 45.2, 41.5, 37.3, 35.3, 33.8, 32.1, 27.5, 26.7, 18.0, 17.4, 16.4, 11.9;

HRMS ESI calcd for  $\text{C}_{28}\text{H}_{42}\text{O}_5\text{Na}$   $[\text{M}+\text{Na}]^+$  481.2925, found 481.2925;

IR (neat)  $\nu_{\text{max}}$  2937, 1740, 1455, 1368, 1210, 1122  $\text{cm}^{-1}$ ;

$[\alpha]_{\text{D}}^{20} = -43.8$  ( $c = 1$ ,  $\text{CHCl}_3$ ).

### Synthesis of compound 40

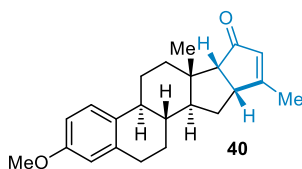

compound 40 (22 mg) was prepared as white solid according to the General procedure in 68% yield.

$R_f = 0.13$  (silica, EtOAc: petroleum ether = 1: 5, stains with PMA);

$^1\text{H}$  NMR (400 MHz, Chloroform-*d*)  $\delta$  7.20 (d,  $J = 8.6$  Hz, 1H), 6.70 (dd,  $J = 8.6, 2.8$  Hz, 1H), 6.61 (d,  $J = 2.7$  Hz, 1H), 5.91 (s, 1H), 3.77 (s, 3H), 3.22 (dd,  $J = 9.9, 5.5$  Hz, 1H), 2.87 – 2.82 (m, 2H), 2.45 (d,  $J = 5.4$  Hz, 1H), 2.31 (dq,  $J = 13.1, 3.9$  Hz, 1H), 2.13 (s, 3H), 2.00 (dt,  $J = 13.3, 3.4$  Hz, 1H), 1.85 (ddd,  $J = 12.7, 5.7, 2.8$  Hz, 1H), 1.74 (dd,  $J = 13.3, 5.2$  Hz, 2H), 1.63 – 1.59 (m, 1H), 1.50 (dd,  $J = 12.7, 3.9$  Hz, 1H), 1.45 – 1.42 (m, 1H), 1.40 – 1.24 (m, 2H), 1.17 (ddd,  $J = 13.0, 10.7, 6.3$  Hz, 1H), 0.94 (s, 3H).

$^{13}\text{C}$  NMR (100 MHz, Chloroform-*d*)  $\delta$  209.8, 179.8, 157.5, 137.7, 132.6, 132.4, 126.4, 113.8, 111.4, 62.0, 55.2, 48.3, 48.2, 43.4, 43.2, 38.4, 34.2, 29.8, 28.2, 28.0, 26.3, 20.8, 18.2;

HRMS ESI calcd for  $\text{C}_{23}\text{H}_{28}\text{O}_2\text{Na}$   $[\text{M}+\text{Na}]^+$  359.1982, found 359.1983;

IR (neat)  $\nu_{\text{max}}$  2926, 1691, 1500, 1452, 1369, 1245, 1042  $\text{cm}^{-1}$ ;

$[\alpha]_{\text{D}}^{20} = -29.6$  ( $c = 1$ ,  $\text{CHCl}_3$ ).



## Synthesis of compound 41

compound 41 (27 mg) was prepared as white solid according to the General procedure in 71% yield.

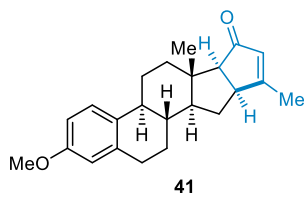

$R_f = 0.13$  (silica, EtOAc: petroleum ether = 1: 5, stains with PMA);

$^1\text{H NMR}$  (400 MHz, Chloroform-*d*)  $\delta$  7.20 (d,  $J = 8.6$  Hz, 1H), 6.71 (dd,  $J = 8.6, 2.9$  Hz, 1H), 6.62 (d,  $J = 2.9$  Hz, 1H), 5.74 (p,  $J = 1.4$  Hz, 1H), 3.77 (s, 3H), 3.27 – 3.21 (m, 1H), 2.88 – 2.82 (m, 2H), 2.56 (d,  $J = 7.0$  Hz, 1H), 2.32 – 2.28 (m, 1H), 2.26 – 2.23 (m, 1H), 2.08 (s, 3H), 1.93 – 1.87 (m, 1H), 1.65 – 1.63 (m, 1H), 1.59 – 1.55 (m,

2H), 1.49 – 1.40 (m, 2H), 1.32 – 1.28 (m, 1H), 1.26 – 1.20 (m, 2H), 0.71 (s, 3H).

$^{13}\text{C NMR}$  (100 MHz, Chloroform-*d*)  $\delta$  210.1, 179.8, 157.5, 137.7, 132.5, 130.4, 126.3, 113.8, 111.4, 62.9, 57.6, 55.2, 49.8, 43.7, 42.3, 39.3, 38.4, 29.7, 27.9, 27.7, 26.2, 17.6, 14.3;

HRMS ESI calcd for  $\text{C}_{23}\text{H}_{28}\text{O}_2\text{Na}$   $[\text{M}+\text{Na}]^+$  359.1982, found 359.1981;

IR (neat)  $\nu_{\text{max}}$  2931, 1692, 1617, 1500, 1446, 1246, 1040  $\text{cm}^{-1}$ ;

$[\alpha]_D^{20} = -17.5$  ( $c = 1$ ,  $\text{CHCl}_3$ ).

### 3.4 Preparation of Conidiogenone C Probe 51

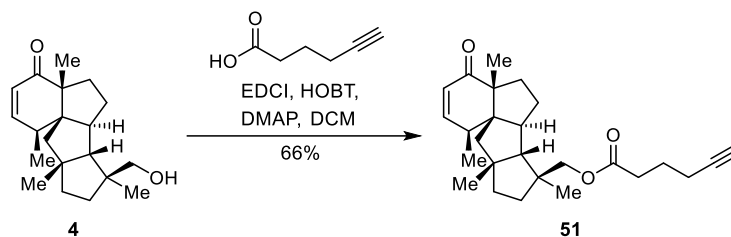

EDCI (3.8 mg, 0.020 mmol), HOBT (2.7 mg, 0.020 mmol), DMAP (2.4 mg, 0.020 mmol), and 5-hexynoic acid (2.2 mg, 0.020 mmol) were added to a stirring solution of compound **4** (2.9 mg, 0.010 mmol) in CH<sub>2</sub>Cl<sub>2</sub> (1 mL). The reaction mixture was stirred at room temperature and monitored by TLC. After 4 h, the reaction mixture was diluted with CH<sub>2</sub>Cl<sub>2</sub> (5 mL), and washed with brine (3 × 5 mL). The organic layer was dried over anhydrous Na<sub>2</sub>SO<sub>4</sub>, filtered, and concentrated *in vacuo*. The residue was purified by silica gel chromatography (EtOAc / petroleum ether = 1 / 6) to afford compound **51** (2.6 mg, 0.0066 mmol, 66%) as a colorless viscous oil.

$R_f$  = 0.48 (silica, EtOAc: petroleum ether = 1: 5, stains with PMA);

**<sup>1</sup>H NMR (400 MHz, Chloroform-*d*)**  $\delta$  6.93 (dd,  $J$  = 10.0, 5.8 Hz, 1H), 5.98 (d,  $J$  = 10.0 Hz, 1H), 3.93 (d,  $J$  = 10.6 Hz, 1H), 3.85 (d,  $J$  = 10.7 Hz, 1H), 2.76-2.67 (m, 1H), 2.47 (t,  $J$  = 7.4 Hz, 2H), 2.35-2.30 (m, 1H), 2.26 (td,  $J$  = 6.9, 2.6 Hz, 2H), 2.16-2.10 (m, 1H), 2.02 (d,  $J$  = 14.7 Hz, 1H), 1.96 (t,  $J$  = 2.6 Hz, 1H), 1.89-1.82 (m, 2H), 1.74-1.64 (m, 4H), 1.64-1.59 (m, 2H), 1.55-1.45 (m, 2H), 1.25 (s, 1H), 1.22 (d,  $J$  = 7.3 Hz, 3H), 1.20 (s, 3H), 1.18 (s, 3H), 0.99 (s, 3H);

**<sup>13</sup>C NMR (100 MHz, Chloroform-*d*)**  $\delta$  205.7, 173.4, 154.3, 127.5, 83.3, 73.0, 69.3, 68.9, 60.0, 57.6, 54.7, 53.0, 46.5, 46.2, 38.9, 38.3, 38.0, 37.2, 34.4, 33.1, 31.1, 23.8, 23.2, 21.2, 18.7, 18.0;

**HRMS ESI** calcd for C<sub>26</sub>H<sub>37</sub>O<sub>3</sub> [M + H]<sup>+</sup> 397.2743, found: 397.2740;

$[\alpha]_D^{20}$  = -9.3 (c = 0.2, MeOH).

#### 4. Supplementary figures and tables for target identification

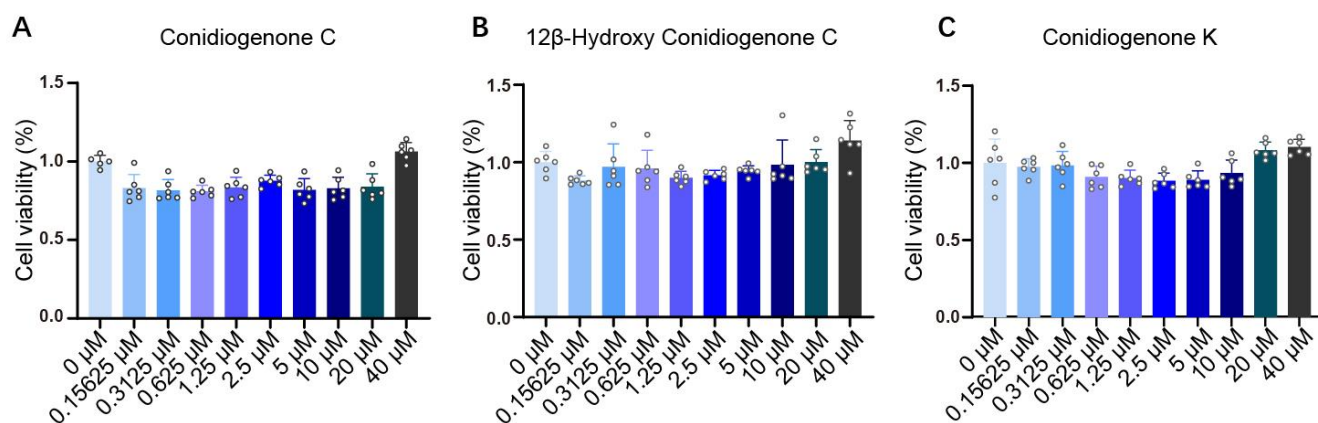

**Supplementary Fig. S1** The Cytotoxicity of Conidiogenone C (A), 12β-Hydroxy Conidiogenone C (B) and Conidiogenone K (C) (0-40 μM) on the viability of HL60 cells, evaluated by CCK-8 kit. All measurements are presented as mean ± SD for 5 biological replicates. Source data are provided as a Source Data file.

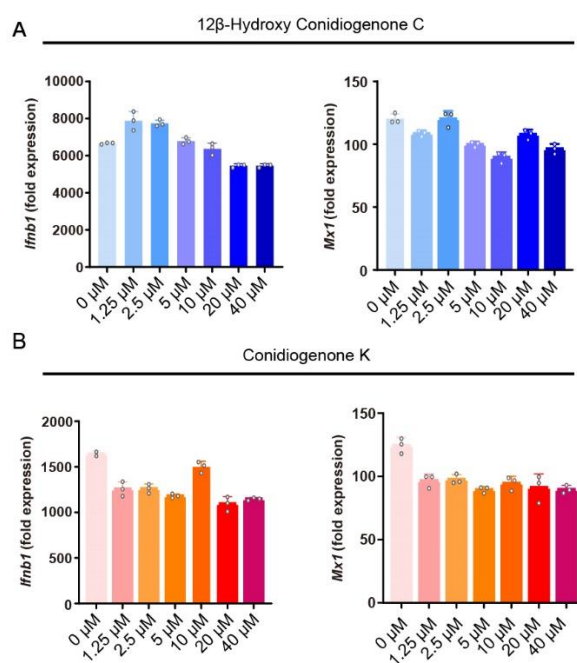

**Supplementary Fig. S2** Inhibitory effects of 12β-Hydroxy Conidiogenone C, Conidiogenone K in LPS-stimulated Raw264.7 cells. (A) *Ifnb1* and *Mx1* expression in Raw264.7 treated with 12β-Hydroxy Conidiogenone C (0-40 μM) by qPCR. (B) *Ifnb1* and *Mx1* expression in Raw264.7 treated with Conidiogenone K (0-40 μM) by qRT-PCR. All measurements are presented as mean ± SD for 3 biological replicates. Source data are provided as a Source Data file.

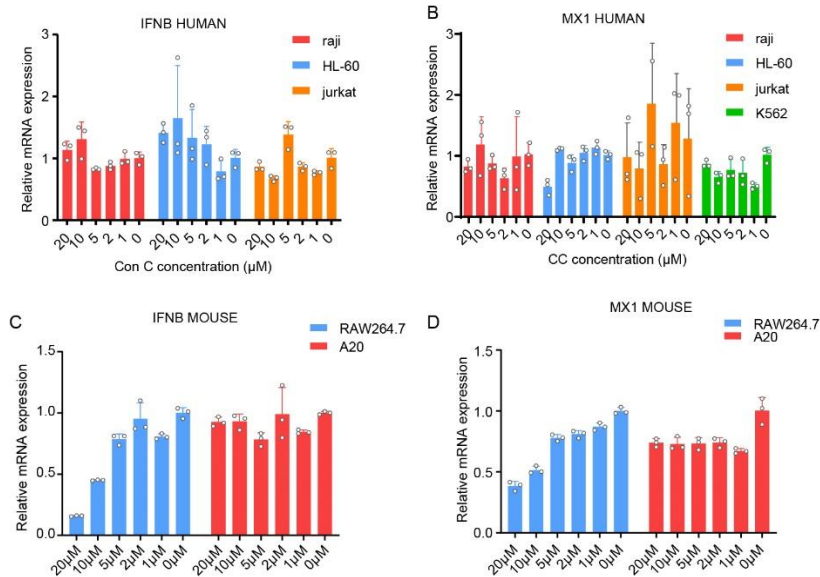

**Supplementary Fig. S3** IFN-stimulated genes (ISGs) (*Ifnb*, *Mx1*) expression in in different cell lines. (A) *Ifnb1* and *Mx1* expression in human cell lines treated with conidiogenone C detected by qPCR. (B) *Ifnb1* and *Mx1* expression in mouse cell lines treated with conidiogenone C detected by qPCR. All measurements are presented as mean  $\pm$  SD for 3 biological replicates. Source data are provided as a Source Data file.

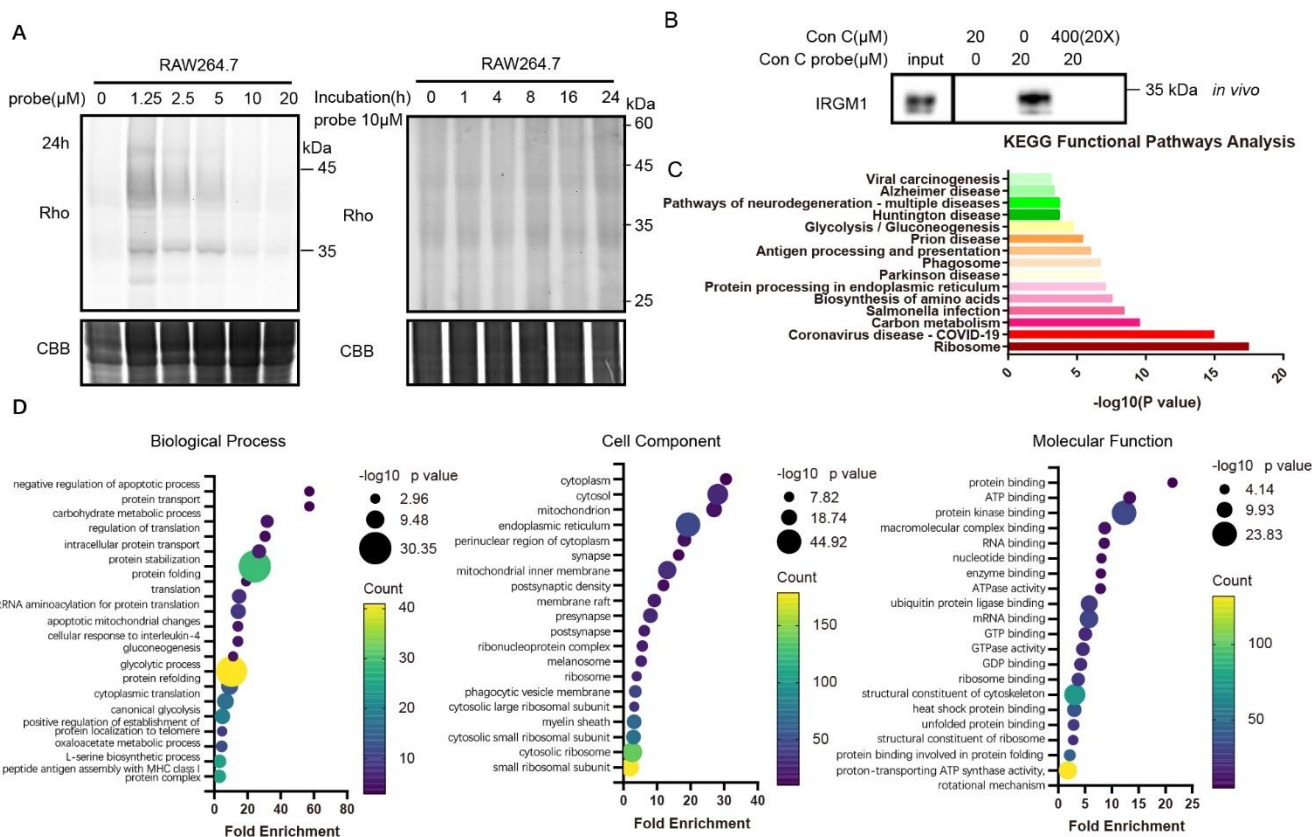

**Supplementary Fig. S4** Evaluation of Conidiogenone C probe labeling in living Raw264.7 and analysis of the targets profiling in Raw264.7 cell lysates. (A) Concentration- and time-dependent labeling of Conidiogenone C

probe in living Raw264.7. The labeled lysates were reacted with azide-rhodamine (Rho) via CuAAC and the fluorescent intensity was determined by in-gel fluorescence scanning. Coomassie Brilliant Blue (CBB) staining demonstrates the equal labeling. (B) *In vivo* competitive pull-down assay using conidiogenone C probe, followed by western blot to confirm that conidiogenone C directly binds to IRGM1 protein in cell lysates. (C) KEGG functional pathways analysis of 59 target proteins identified by Conidiogenone C probe. (D) Gene ontology analysis Analysis of 59 target proteins identified by Conidiogenone C probe.

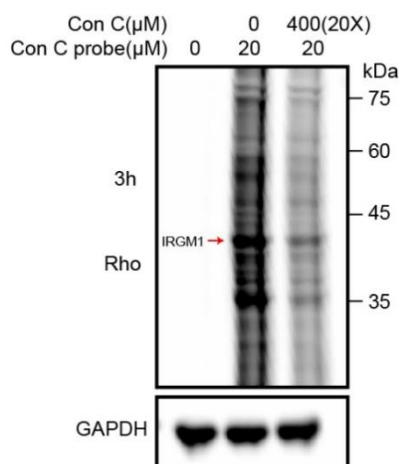

**Supplementary Fig. S5** In-gel fluorescence profiling of conidiogenone C probe, followed by western blot to confirm the outstanding band in the gel is IRGM1, n=2 independent experiments with similar results.

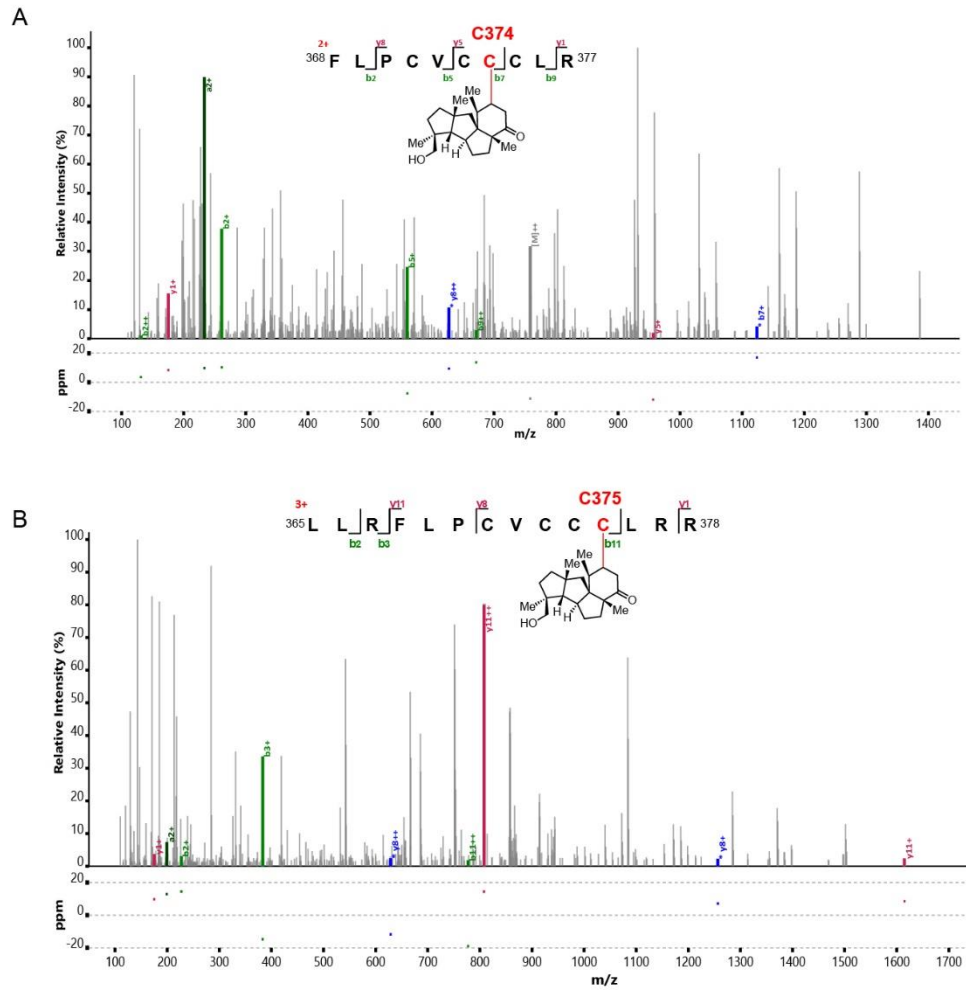

**Supplementary Fig. S6** Representative MS/MS spectrum for the identification of conidiogenone C-labeled IRGM1 peptides containing two binding residues C374 (A) and C375 (B), n=3 independent experiments with similar results.

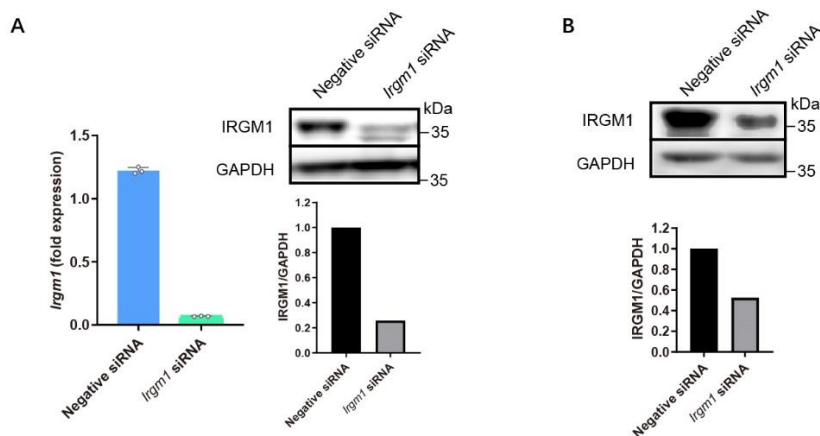

**Supplementary Fig. S7** Silencing efficiency for siRNAs against *IRGM1* with (B) or without (A) LPS-stimulation. All measurements are presented as mean  $\pm$  SD. Source data are provided as a Source Data file.

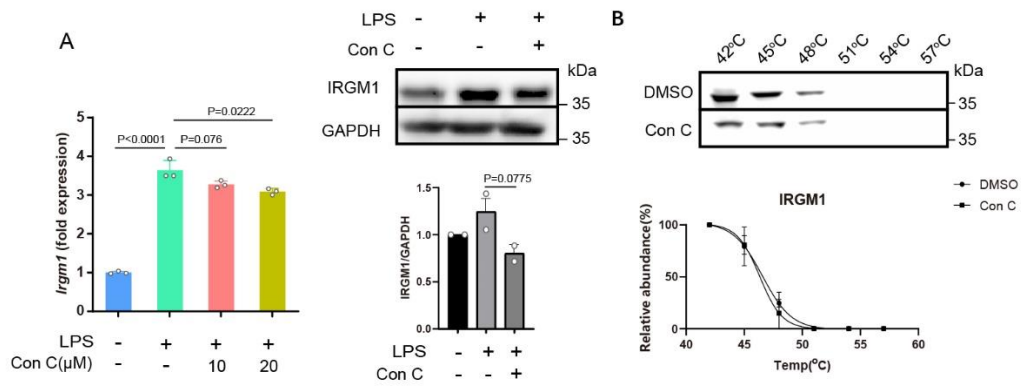

**Supplementary Fig. S8** Conidiogenone C did not decrease the expression of IRGM1 or affect the thermal stability of IRGM1. (A) The gene expression and protein level of IRGM1 in Raw264.7 treated with or without Conidiogenone C. (B) The interactions between Conidiogenone C and IRGM1 confirmed by CETSA-WB. Con C = conidiogenone C. All measurements are presented as mean  $\pm$  SD for three(a, left; b) or two(a, right) biological replicates. Statistical differences were determined by a two-sided Student's t-test. Source data are provided as a Source Data file.

**Table S7. List of the overlap of the target proteins identified by Conidiogenone C probe in three biological replicates.**

| Protein name | Uniprot accession | Description                                             |
|--------------|-------------------|---------------------------------------------------------|
| RAB18        | P35293            | Ras-related protein Rab-18                              |
| XPO1         | Q6P5F9            | Exportin-1                                              |
| IF4A1        | P60843            | Eukaryotic initiation factor 4A-I                       |
| EF1A1        | P10126            | Elongation factor 1-alpha 1                             |
| TBB5         | P99024            | Tubulin beta-5 chain                                    |
| CH60         | P63038            | 60 kDa heat shock protein                               |
| AT1A1        | Q8VDN2            | Sodium/potassium-transporting ATPase subunit alpha-1    |
| ACTB         | P60710            | Actin                                                   |
| PLSL         | Q61233            | Plastin-2                                               |
| IMB1         | P70168            | Importin subunit beta-1                                 |
| EF2          | P58252            | Elongation factor 2                                     |
| TBA1B        | P05213            | Tubulin alpha-1B chain                                  |
| G3P          | P16858            | Glyceraldehyde-3-phosphate dehydrogenase                |
| IRGM1        | Q60766            | Immunity-related GTPase family M protein 1              |
| GNAI2        | P08752            | Guanine nucleotide-binding protein G(i) subunit alpha-2 |
| TCPQ         | P42932            | T-complex protein 1 subunit theta                       |
| TCPH         | P80313            | T-complex protein 1 subunit eta                         |
| TNPO1        | Q8BFY9            | Transportin-1                                           |
| DHB12        | O70503            | Very-long-chain 3-oxoacyl-CoA reductase                 |
| HS90A        | P07901            | Heat shock protein HSP 90-alpha                         |
| RL7A         | P12970            | 60S ribosomal protein L7a                               |
| ADT1         | P48962            | ADP/ATP translocase 1                                   |
| ANXA5        | P48036            | Annexin A5                                              |
| ARF3         | P61205            | ADP-ribosylation factor 3                               |
| IRG1         | P54987            | Cis-aconitate decarboxylase                             |
| MDHM         | P08249            | Malate dehydrogenase                                    |
| VDAC2        | Q60930            | Voltage-dependent anion-selective channel protein 2     |
| HS90B        | P11499            | Heat shock protein HSP 90-beta                          |
| ENOA         | P17182            | Alpha-enolase                                           |
| ADT2         | P51881            | ADP/ATP translocase 2                                   |
| RS5          | P97461            | 40S ribosomal protein S5                                |
| PGK1         | P09411            | Phosphoglycerate kinase 1                               |
| TCPG         | P80318            | T-complex protein 1 subunit gamma                       |
| LDHA         | P06151            | L-lactate dehydrogenase A chain                         |
| EF1G         | Q9D8N0            | Elongation factor 1-gamma                               |
| CALX         | P35564            | Calnexin                                                |
| ENPL         | P08113            | Endoplasmic reticulum protein                           |
| ATPA         | Q03265            | ATP synthase subunit alpha                              |
| RAB7A        | P51150            | Ras-related protein Rab-7a                              |
| CALR         | P14211            | Calreticulin                                            |
| GLYM         | Q9CZN7            | Serine hydroxymethyltransferase                         |
| S61A1        | P61620            | Protein transport protein Sec61 subunit alpha isoform 1 |
| RAC2         | Q05144            | Ras-related C3 botulinum toxin substrate 2              |
| RS8          | P62242            | 40S ribosomal protein S8                                |



|       |        |                                                     |
|-------|--------|-----------------------------------------------------|
| RL4   | Q9D8E6 | 60S ribosomal protein L4                            |
| MPRD  | P24668 | Cation-dependent mannose-6-phosphate receptor       |
| COX2  | P00405 | Cytochrome c oxidase subunit 2                      |
| RS4X  | P62702 | 40S ribosomal protein S4                            |
| RS3   | P62908 | 40S ribosomal protein S3                            |
| PRDX1 | P35700 | Peroxiredoxin-1                                     |
| PDIA3 | P27773 | Protein disulfide-isomerase A3                      |
| RS11  | P62281 | 40S ribosomal protein S11                           |
| RL6   | P47911 | 60S ribosomal protein L6                            |
| BIP   | P20029 | Endoplasmic reticulum chaperone BiP                 |
| RAB1B | Q9D1G1 | Ras-related protein Rab-1B                          |
| RL7   | P14148 | 60S ribosomal protein L7                            |
| RS3A  | P97351 | 40S ribosomal protein S3a                           |
| RS15A | P62245 | 40S ribosomal protein S15a                          |
| M2OM  | Q9CR62 | Mitochondrial 2-oxoglutarate/malate carrier protein |

**Table S8. List of primers for qRT-PCR**

|              | Sense 5'-3'             | Antisense 5'-3'          |
|--------------|-------------------------|--------------------------|
| <i>Irgm1</i> | TGCTCCACTACTCCCCAACAT   | GCTCCTACTGACCTCAGGTAAC   |
| <i>Gapdh</i> | AGGTCGGTGTGAACGGATTTG   | TGTAGACCATGTAGTTGAGGTCA  |
| <i>Ifnb</i>  | GCACTACAGGCTCCGAGATGAAC | TTGTCGTTGCTTGGTTCTCCTTGT |
| <i>Mxl</i>   | GACCATAGGGGTCTTGACCAA   | AGACTTGCTCTTTCTGAAAAGCC  |

## 5. HPLC Spectra of Wieland-Miescher ketone

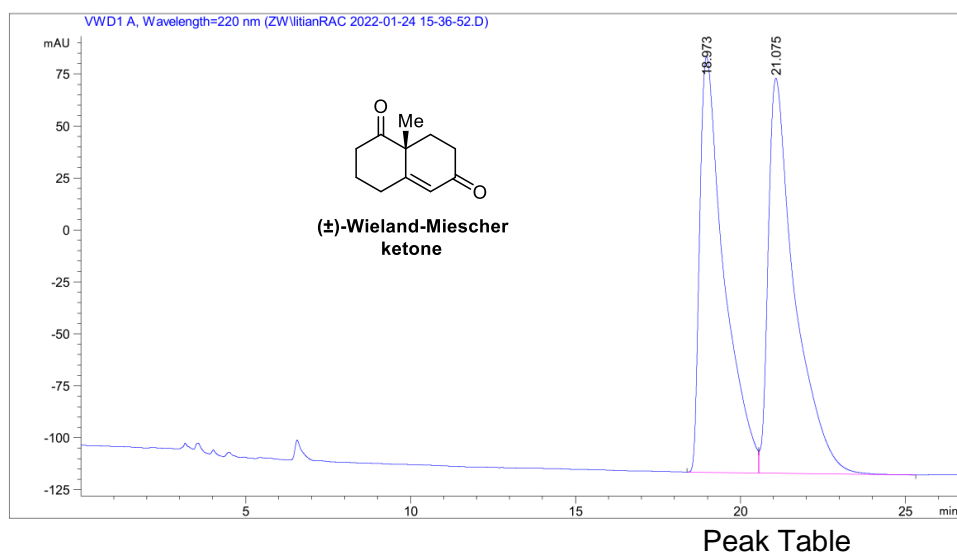

VWD1 A, Wavelength = 220 nm

| Peak# | Ret. Time | Type | [min]  | Area       | Height    | Area (%) |
|-------|-----------|------|--------|------------|-----------|----------|
| 1     | 18.973    | BV   | 0.7383 | 1.02498e4  | 199.85507 | 49.1108  |
| 2     | 21.075    | VB   | 0.8022 | 1.062110e4 | 189.98506 | 50.8892  |
| Total |           |      |        | 2.08708e4  | 389.84013 | 100      |

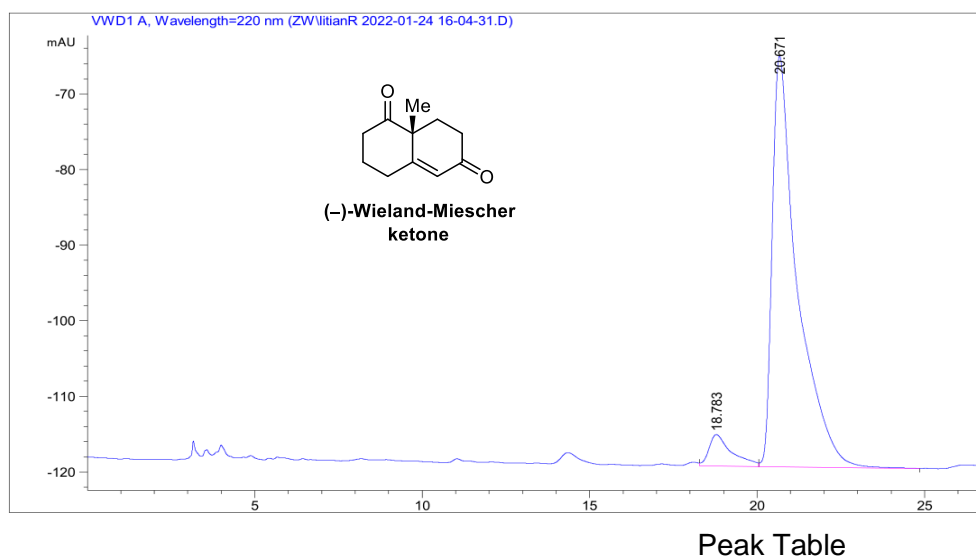

VWD1 A, Wavelength = 220 nm

| Peak# | Ret. Time | Type | [min]  | Area       | Height   | Area (%) |
|-------|-----------|------|--------|------------|----------|----------|
| 1     | 18.783    | VV   | 0.6679 | 194.61844  | 4.14529  | 6.4061   |
| 2     | 20.671    | VB   | 0.7424 | 2843.39233 | 54.34420 | 93.5939  |
| Total |           |      |        | 3038.01077 | 58.48949 | 100      |

Supplementary Fig. S9. HPLC Spectra of (-)-Wieland-Miescher ketone

## 6. Crystallographic Data

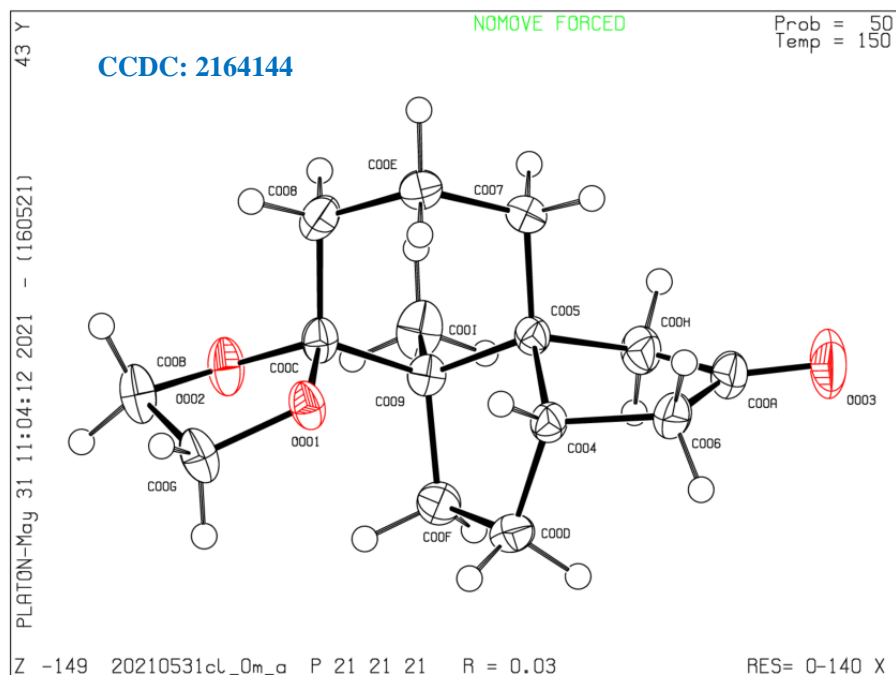

|                                                               |                |                                 |
|---------------------------------------------------------------|----------------|---------------------------------|
| Bond precision:                                               | C-C = 0.0021 Å | Wavelength=1.34139              |
| Cell:                                                         | a=7.5163 (3)   | b=7.9585 (3) c=21.9789 (8)      |
|                                                               | alpha=90       | beta=90 gamma=90                |
| Temperature:                                                  | 150 K          |                                 |
|                                                               | Calculated     | Reported                        |
| Volume                                                        | 1314.74 (9)    | 1314.74 (9)                     |
| Space group                                                   | P 21 21 21     | P 21 21 21                      |
| Hall group                                                    | P 2ac 2ab      | P 2ac 2ab                       |
| Moiety formula                                                | C15 H22 O3     | C15 H22 O3                      |
| Sum formula                                                   | C15 H22 O3     | C15 H22 O3                      |
| Mr                                                            | 250.33         | 250.32                          |
| Dx, g cm <sup>-3</sup>                                        | 1.265          | 1.265                           |
| Z                                                             | 4              | 4                               |
| Mu (mm <sup>-1</sup> )                                        | 0.441          | 0.445                           |
| F000                                                          | 544.0          | 544.0                           |
| F000'                                                         | 545.23         |                                 |
| h, k, lmax                                                    | 9, 9, 26       | 9, 9, 26                        |
| Nref                                                          | 2507 [ 1477]   | 2473                            |
| Tmin, Tmax                                                    | 0.938, 0.956   | 0.620, 0.751                    |
| Tmin'                                                         | 0.915          |                                 |
| Correction method= # Reported T Limits: Tmin=0.620 Tmax=0.751 |                |                                 |
| AbsCorr = MULTI-SCAN                                          |                |                                 |
| Data completeness=                                            | 1.67/0.99      | Theta(max)= 54.901              |
| R(reflections)=                                               | 0.0279( 2429)  | wR2(reflections)= 0.0758( 2473) |
| S =                                                           | 1.078          | Npar= 164                       |

- 0 **ALERT level A** = Most likely a serious problem - resolve or explain  
 0 **ALERT level B** = A potentially serious problem, consider carefully  
 0 **ALERT level C** = Check. Ensure it is not caused by an omission or oversight  
 10 **ALERT level G** = General information/check it is not something unexpected

### Supplementary Fig. S10. Crystallographic Data of Compound 18

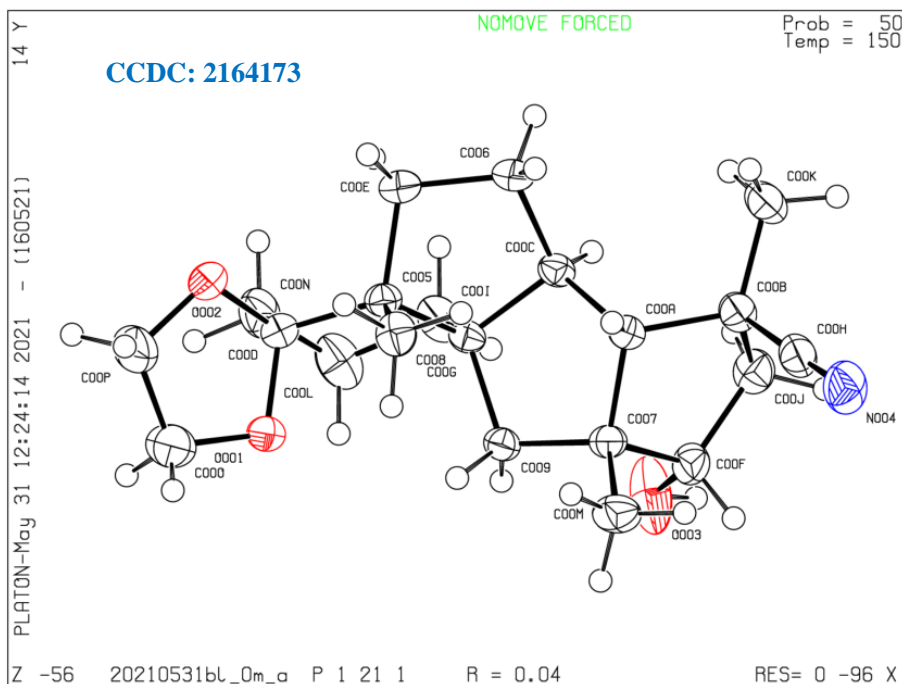

Bond precision: C-C = 0.0033 Å

Wavelength=1.34139

Cell: a=8.1338(5) b=11.7106(7) c=9.8396(6)  
 alpha=90 beta=91.636(2) gamma=90  
 Temperature: 150 K

|                                     | Calculated                                       | Reported                                         |
|-------------------------------------|--------------------------------------------------|--------------------------------------------------|
| Volume                              | 936.86(10)                                       | 936.86(10)                                       |
| Space group                         | P 21                                             | P 1 21 1                                         |
| Hall group                          | P 2yb                                            | P 2yb                                            |
| Moiety formula                      | C <sub>21</sub> H <sub>31</sub> N O <sub>3</sub> | C <sub>21</sub> H <sub>31</sub> N O <sub>3</sub> |
| Sum formula                         | C <sub>21</sub> H <sub>31</sub> N O <sub>3</sub> | C <sub>21</sub> H <sub>31</sub> N O <sub>3</sub> |
| Mr                                  | 345.47                                           | 345.47                                           |
| D <sub>x</sub> , g cm <sup>-3</sup> | 1.225                                            | 1.225                                            |
| Z                                   | 2                                                | 2                                                |
| Mu (mm <sup>-1</sup> )              | 0.407                                            | 0.411                                            |
| F <sub>000</sub>                    | 376.0                                            | 376.0                                            |
| F <sub>000</sub> '                  | 376.81                                           |                                                  |
| h, k, lmax                          | 9, 13, 11                                        | 9, 13, 11                                        |
| Nref                                | 3169[ 1671]                                      | 3087                                             |
| Tmin, Tmax                          | 0.906, 0.921                                     | 0.559, 0.750                                     |
| Tmin'                               | 0.884                                            |                                                  |

Correction method= # Reported T Limits: Tmin=0.559 Tmax=0.750  
 AbsCorr = MULTI-SCAN

Data completeness= 1.85/0.97 Theta(max)= 51.790

R(reflections)= 0.0370( 3023) wR2(reflections)= 0.0986( 3087)

S = 1.065 Npar= 231

- 0 **ALERT level A** = Most likely a serious problem - resolve or explain  
 0 **ALERT level B** = A potentially serious problem, consider carefully  
 4 **ALERT level C** = Check. Ensure it is not caused by an omission or oversight  
 18 **ALERT level G** = General information/check it is not something unexpected

**Supplementary Fig. S11. Crystallographic Data of Compound 45**

## 7. $^1\text{H}$ and $^{13}\text{C}$ NMR Spectra

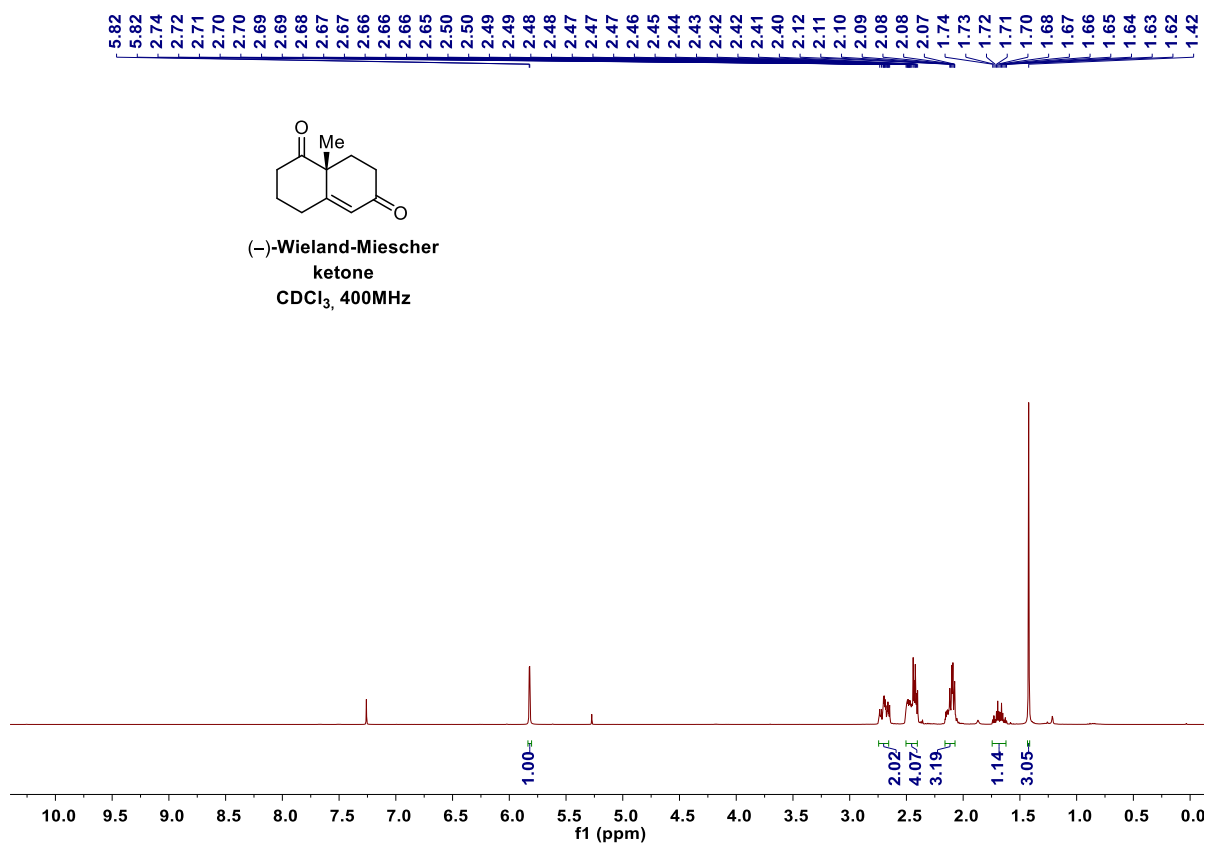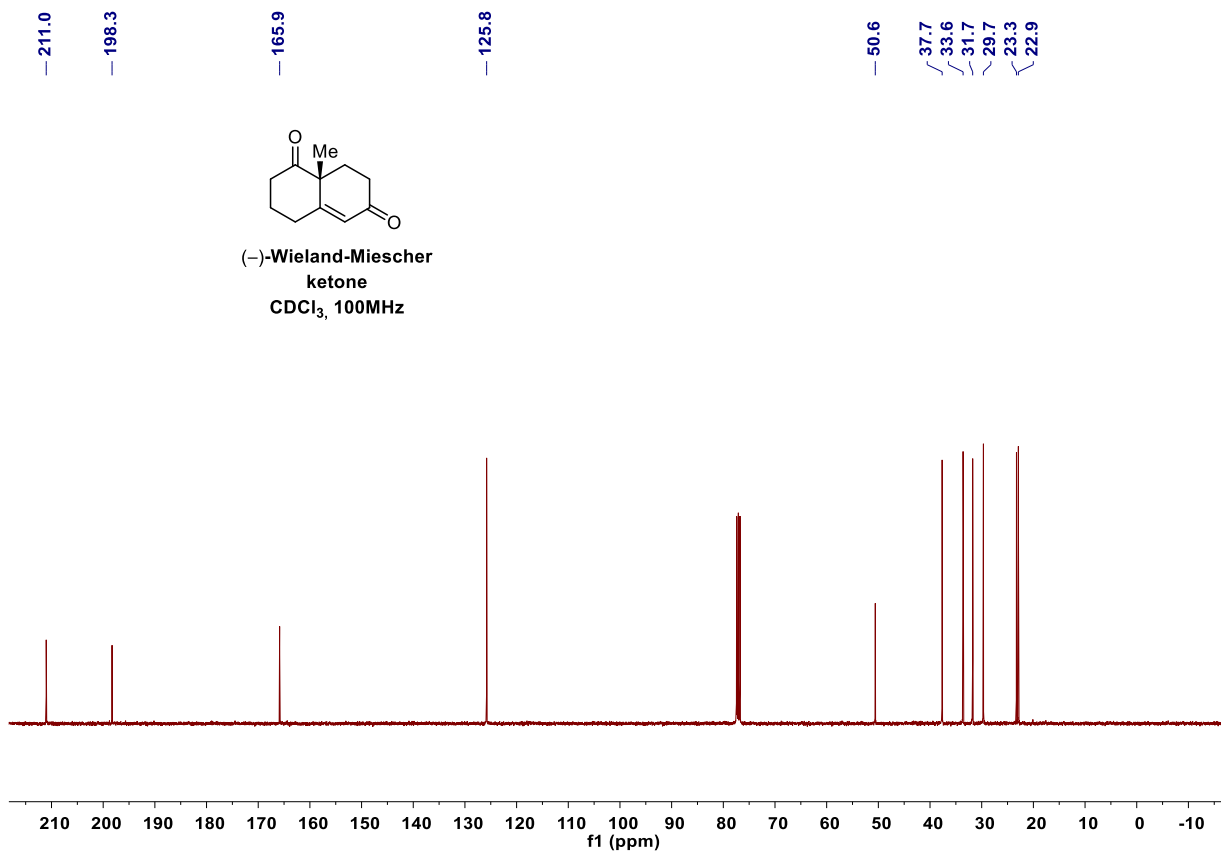

Supplementary Fig. S12.  $^1\text{H}$  and  $^{13}\text{C}$  NMR Spectra of (-)-Wieland-Miescher ketone

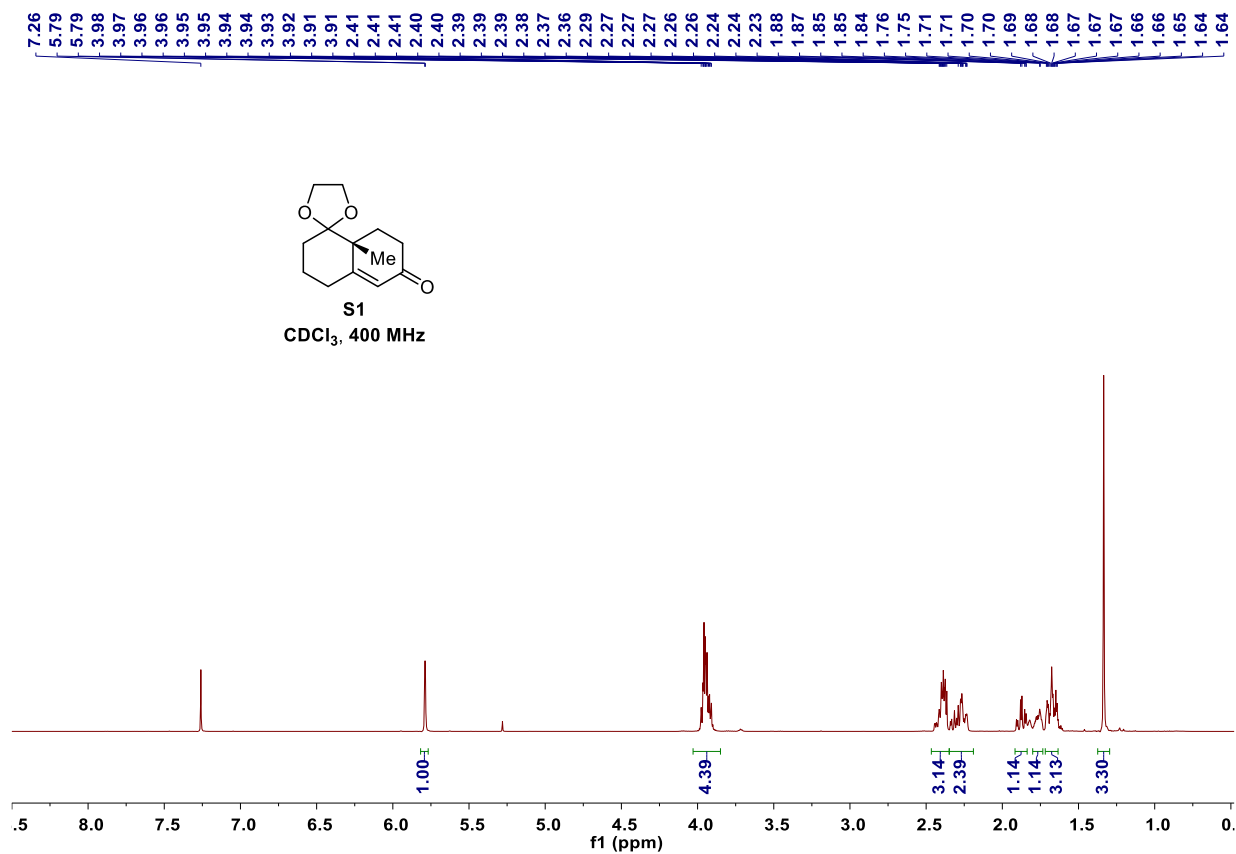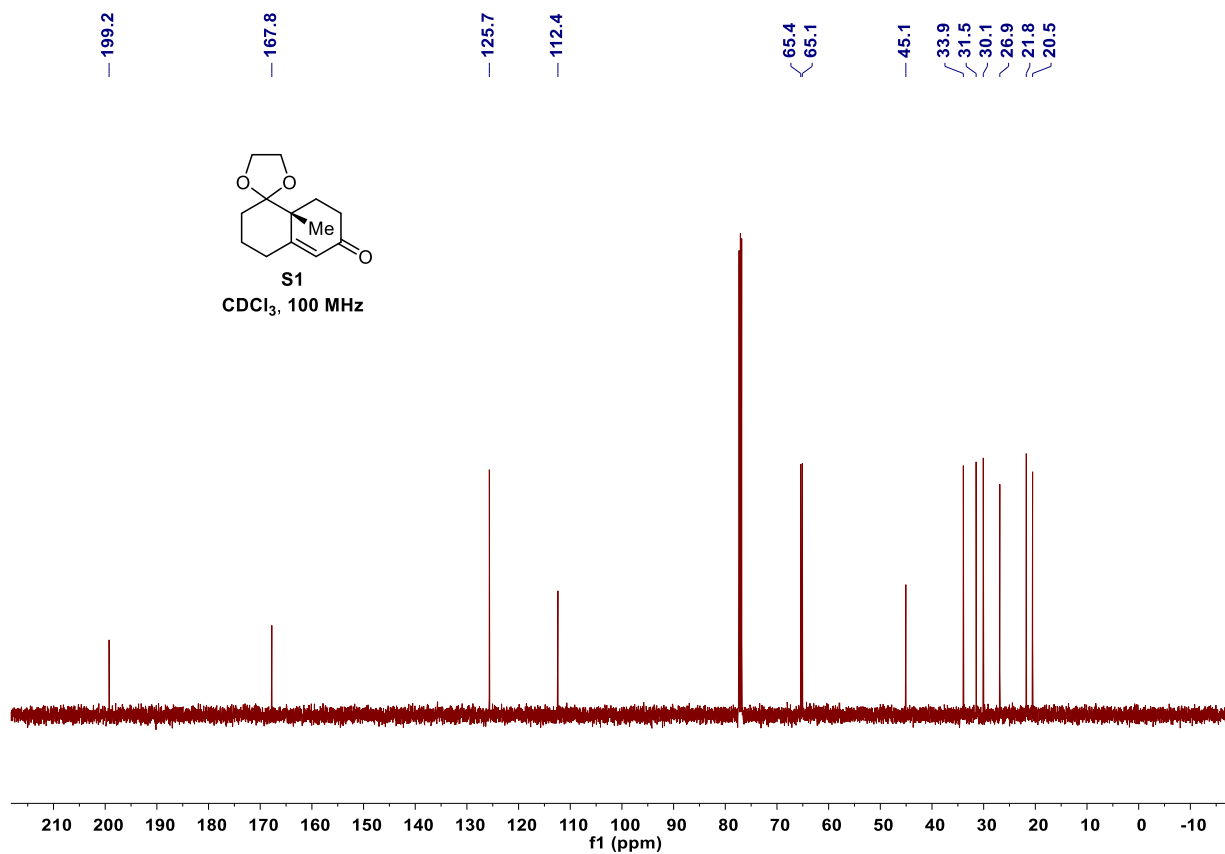

Supplementary Fig. S13. <sup>1</sup>H and <sup>13</sup>C NMR Spectra of S1

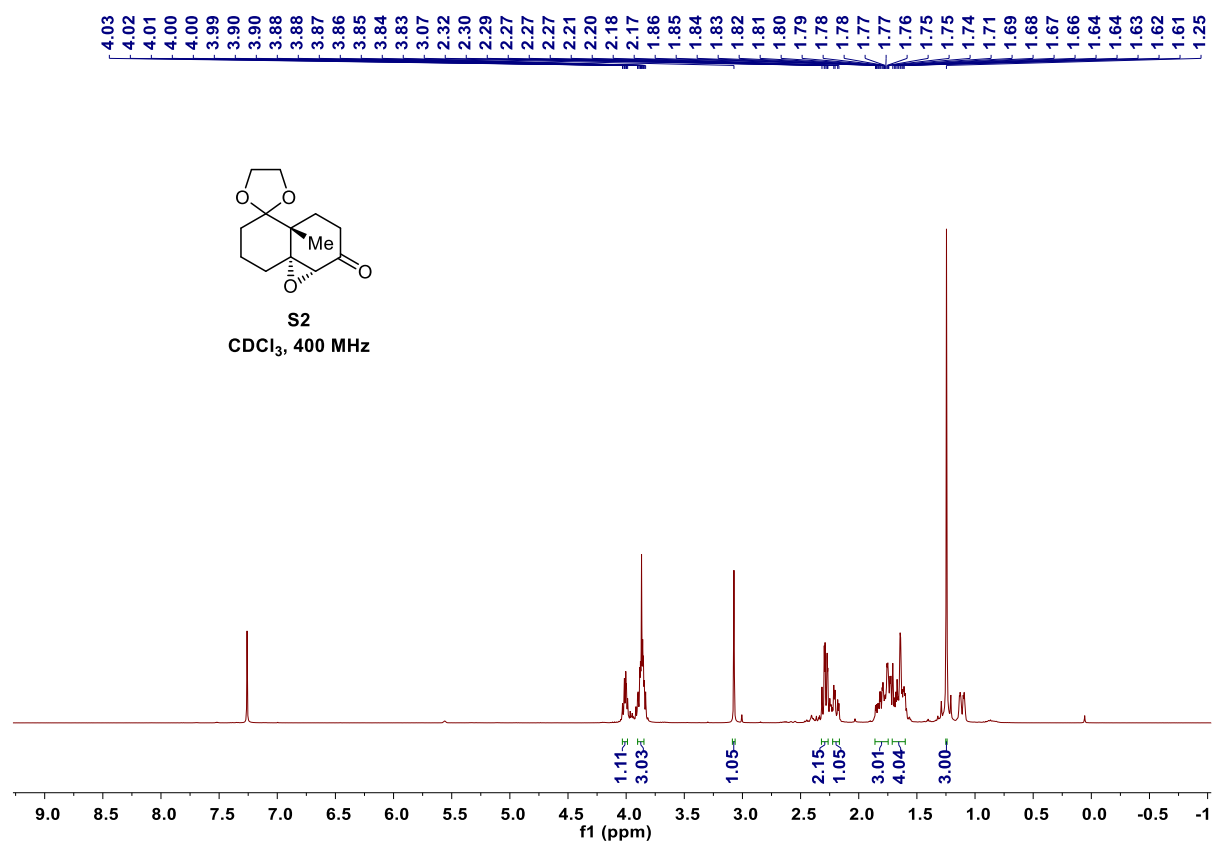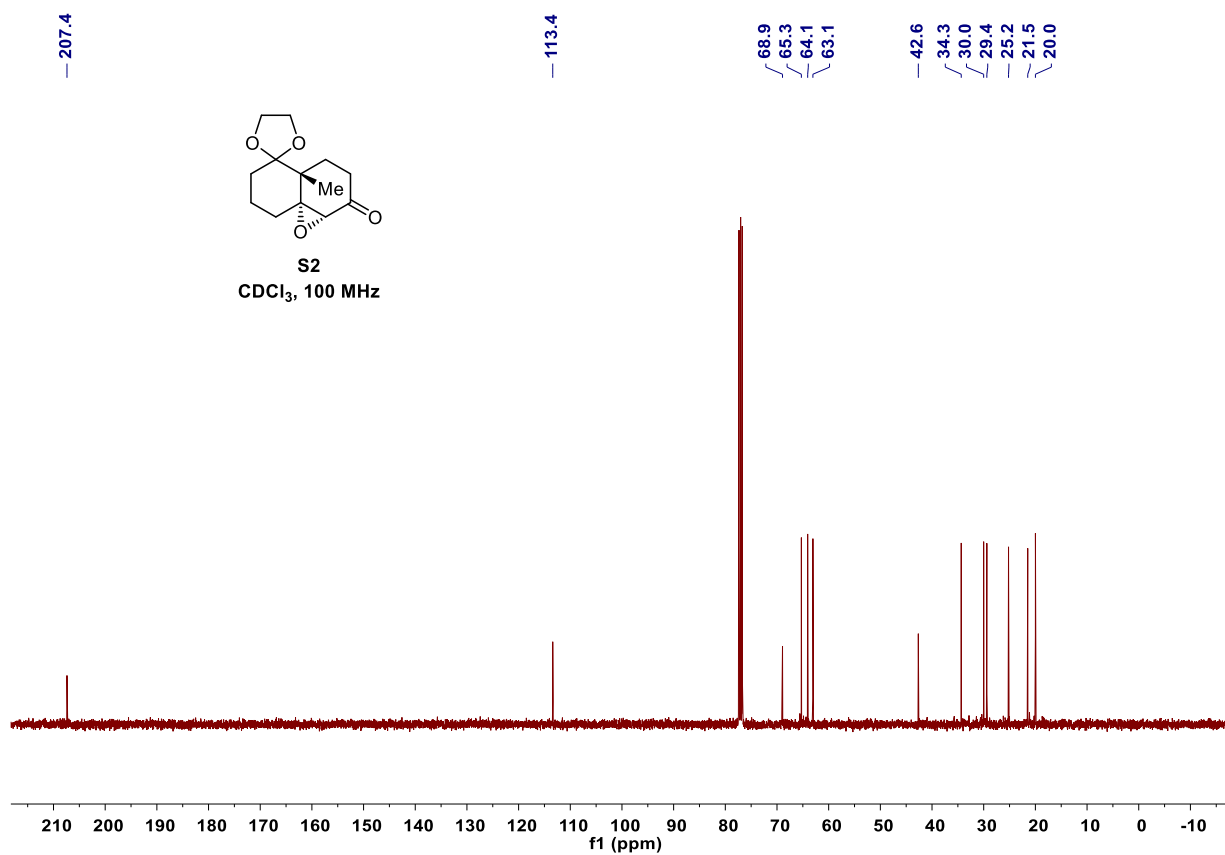

Supplementary Fig. S14. <sup>1</sup>H and <sup>13</sup>C NMR Spectra of S2

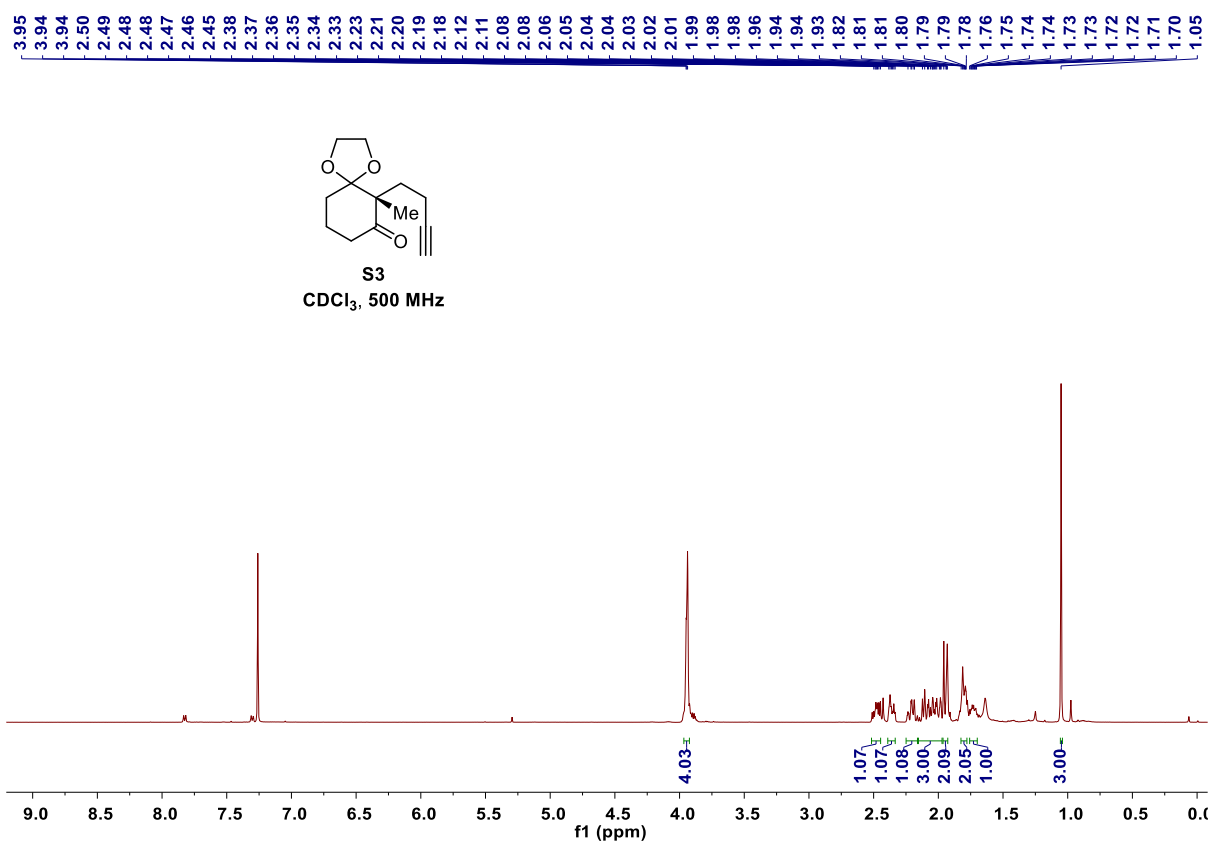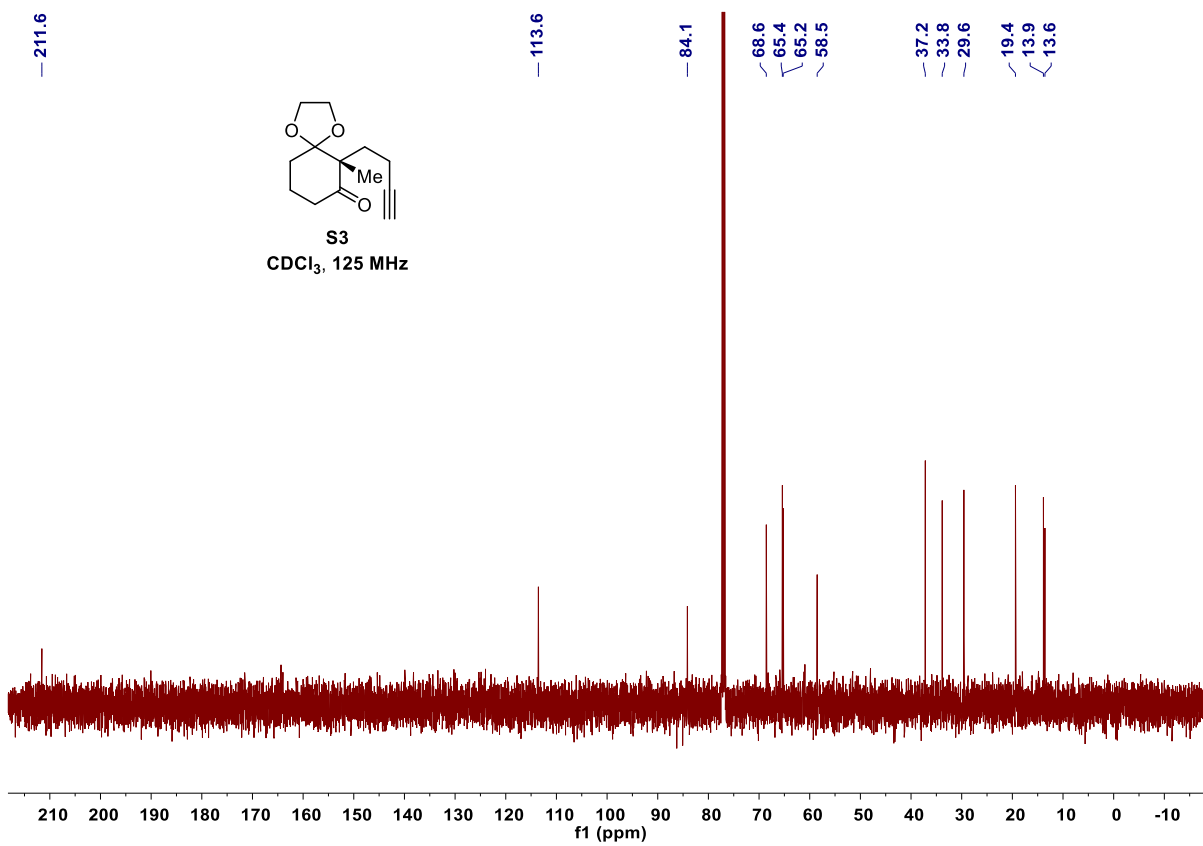

Supplementary Fig. S15. <sup>1</sup>H and <sup>13</sup>C NMR Spectra of S3



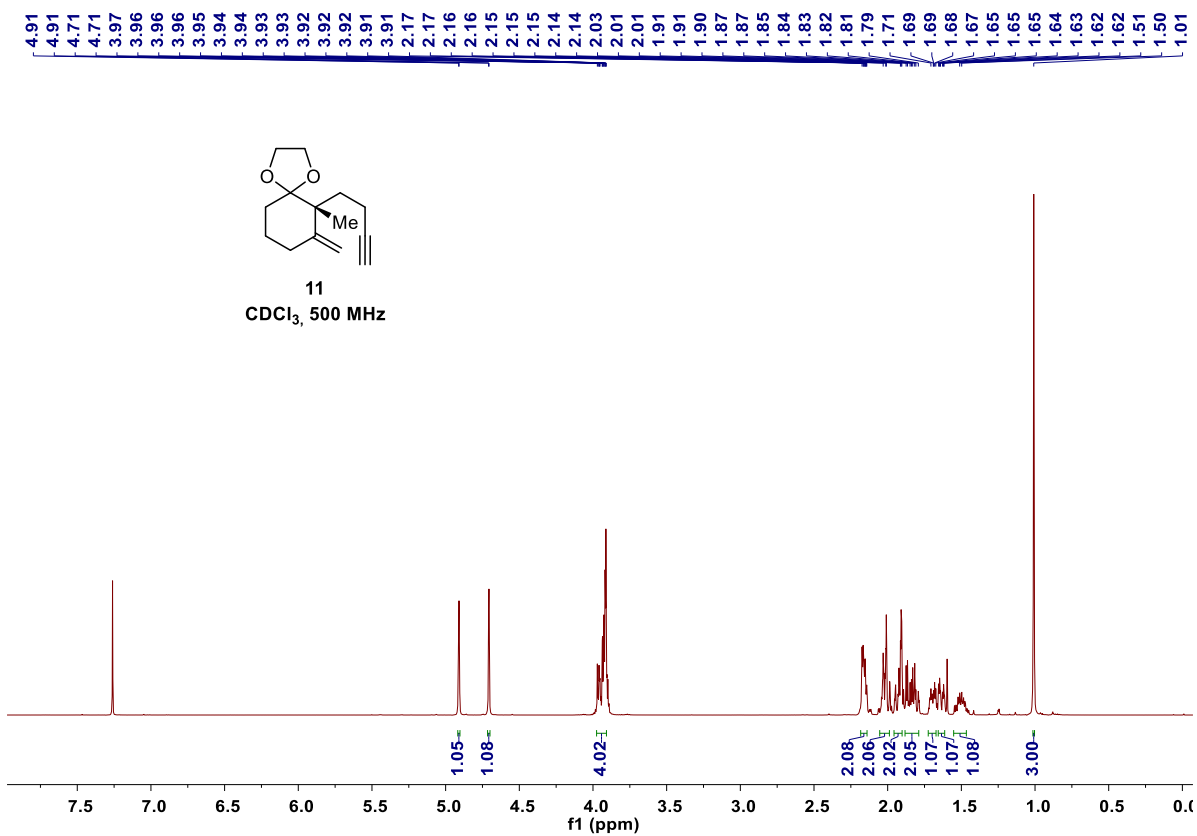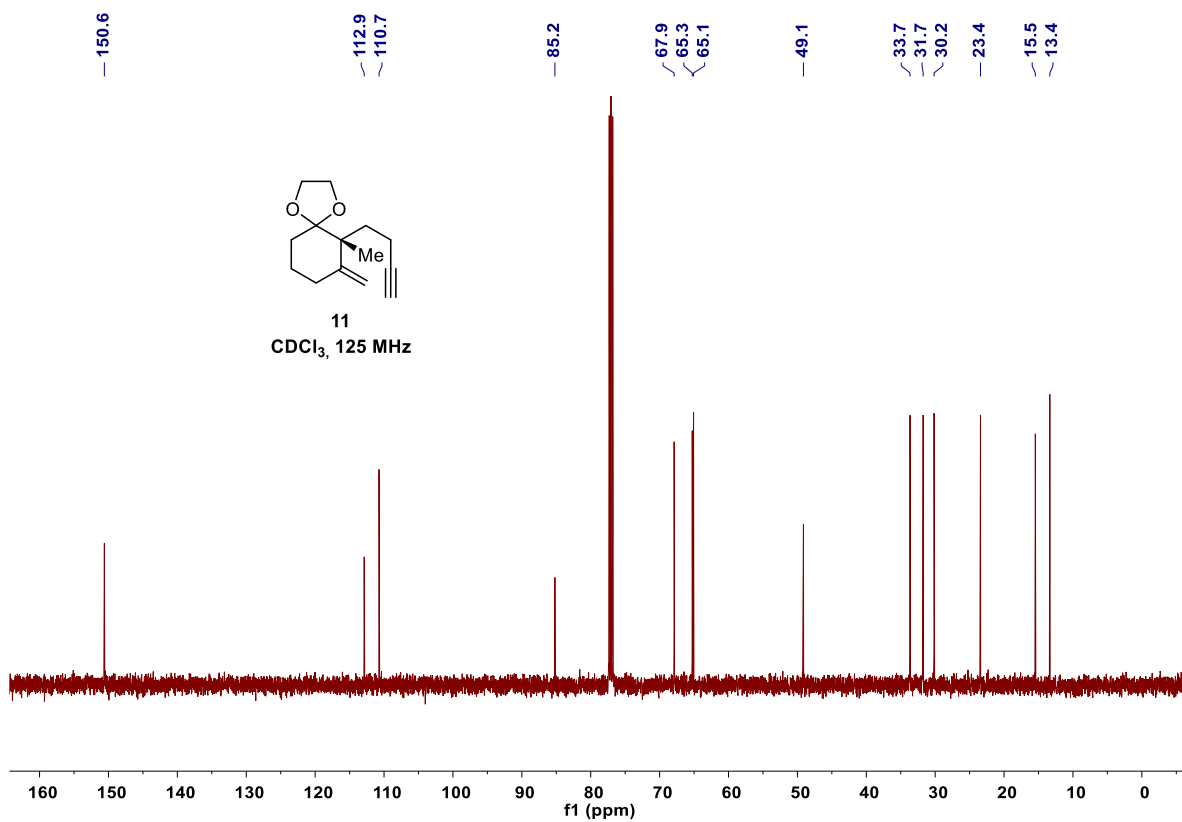

Supplementary Fig. S16. <sup>1</sup>H and <sup>13</sup>C NMR Spectra of 11

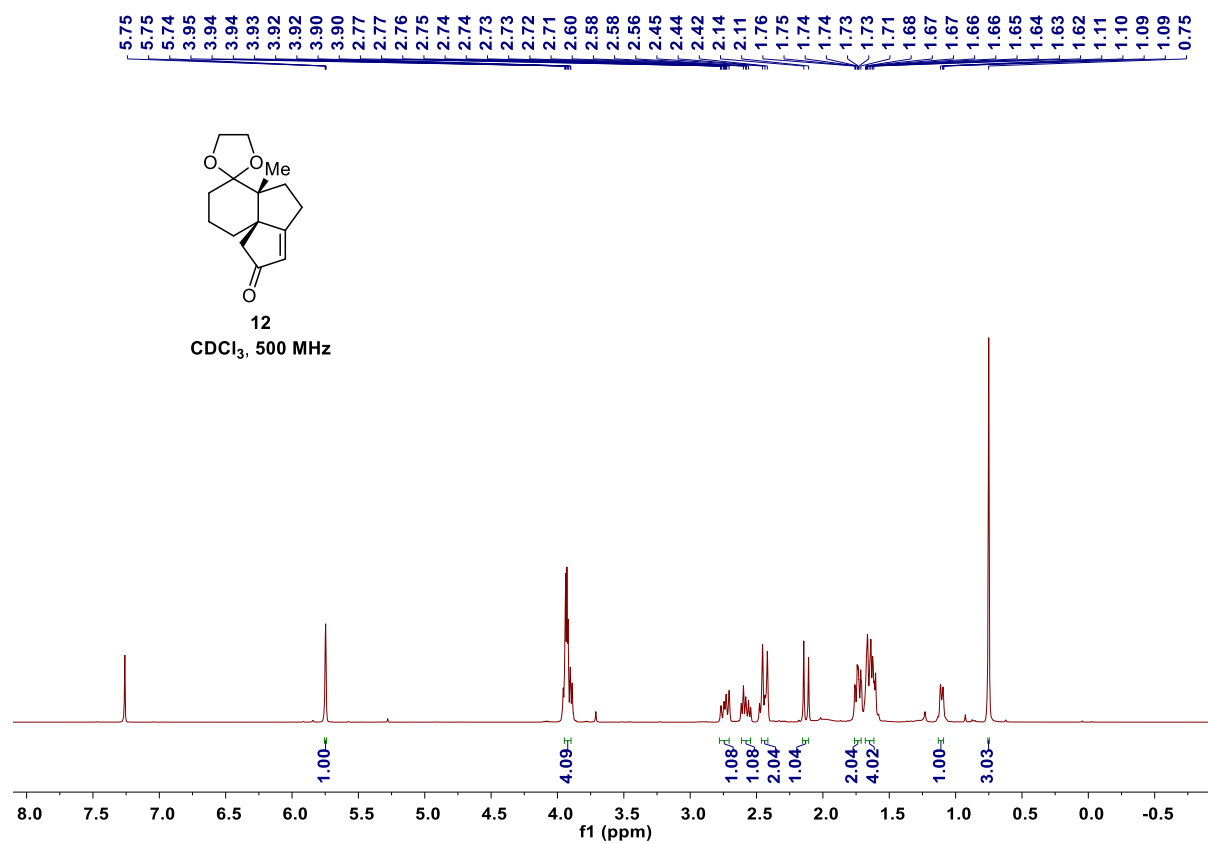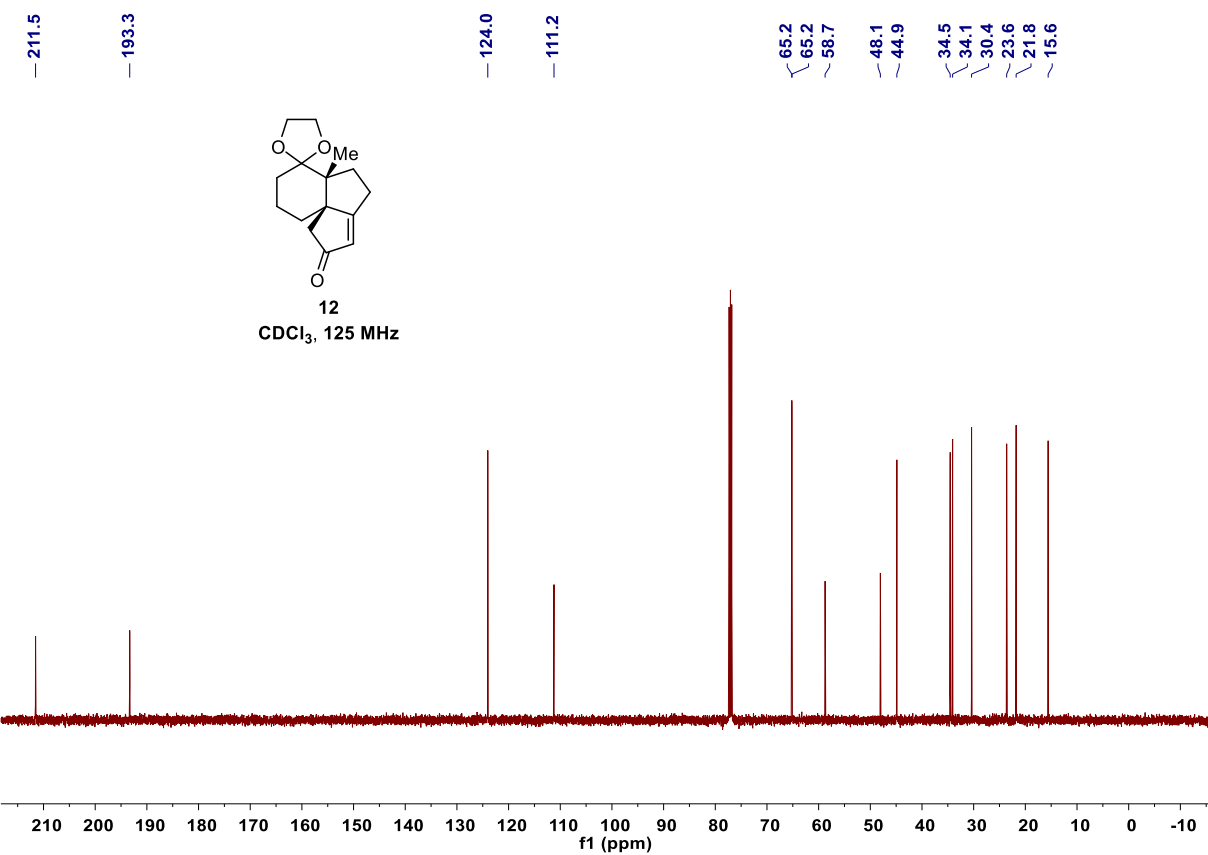

Supplementary Fig. S17. <sup>1</sup>H and <sup>13</sup>C NMR Spectra of 12

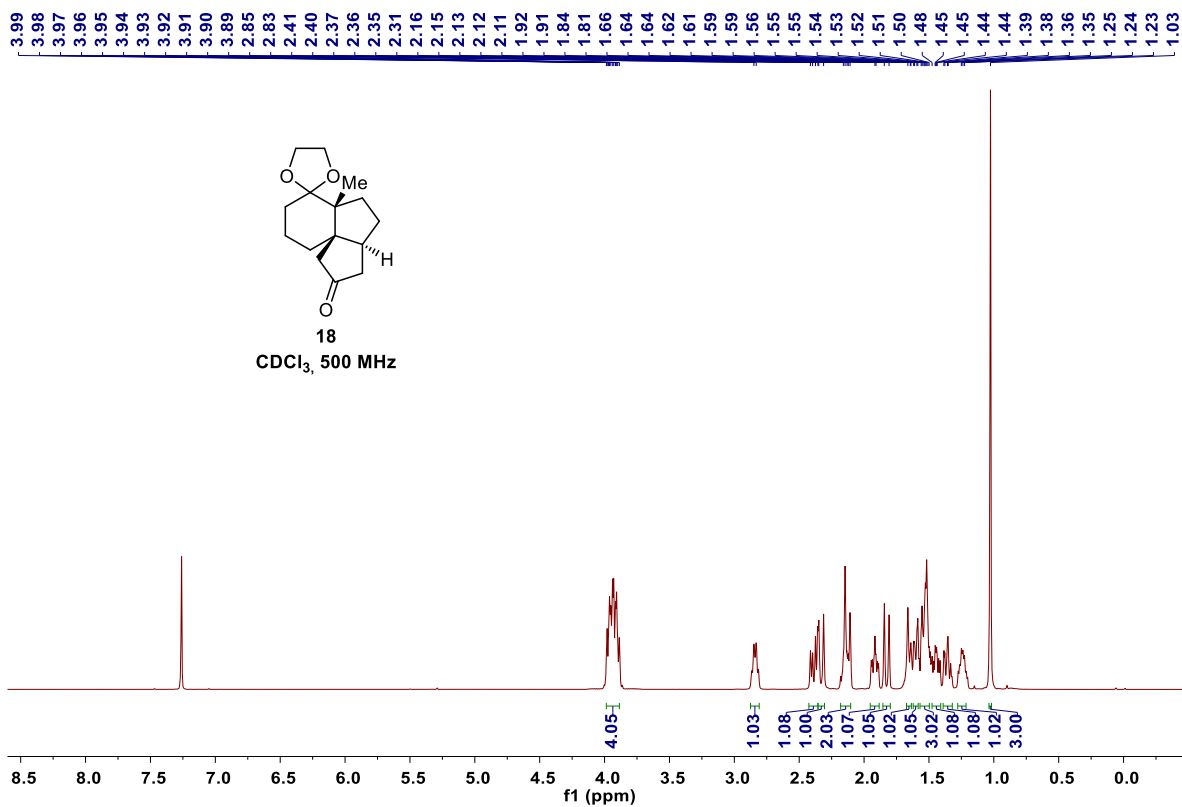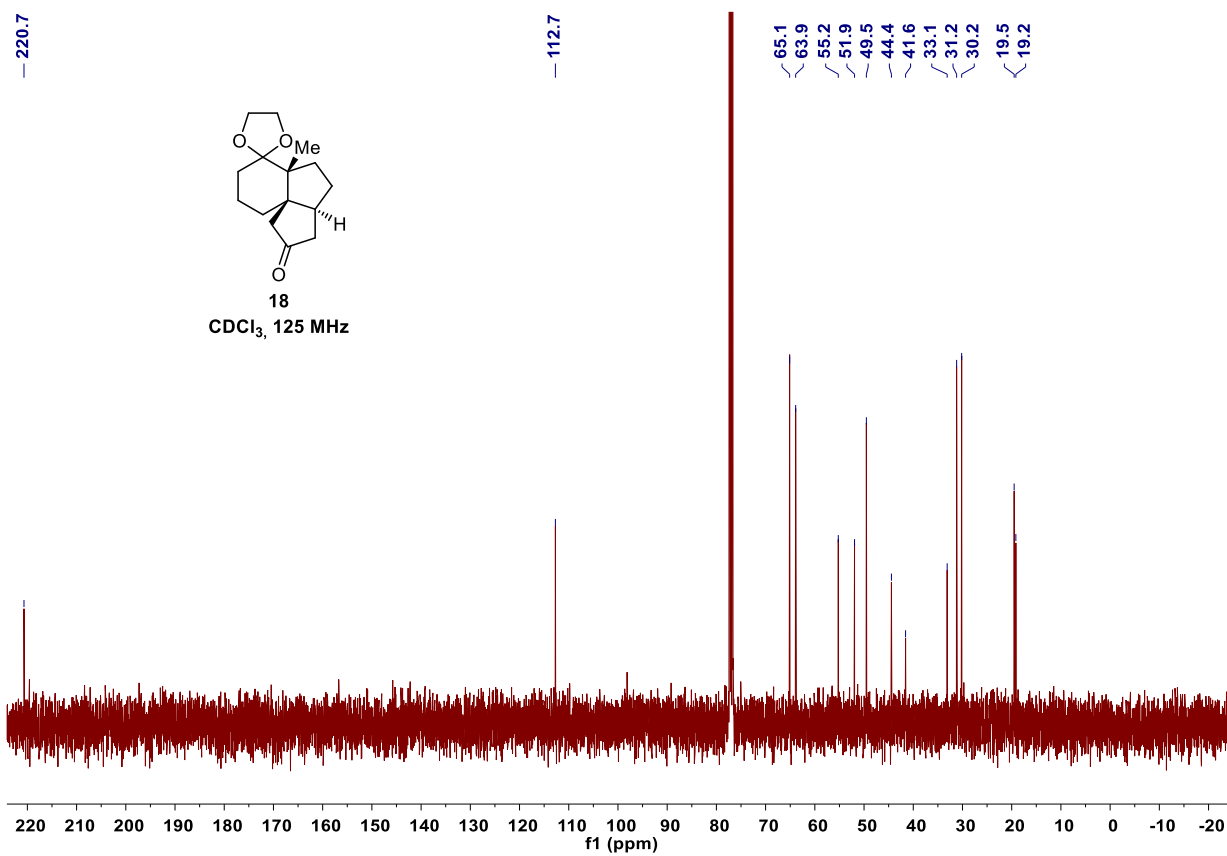

Supplementary Fig. S18. <sup>1</sup>H and <sup>13</sup>C NMR Spectra of 18

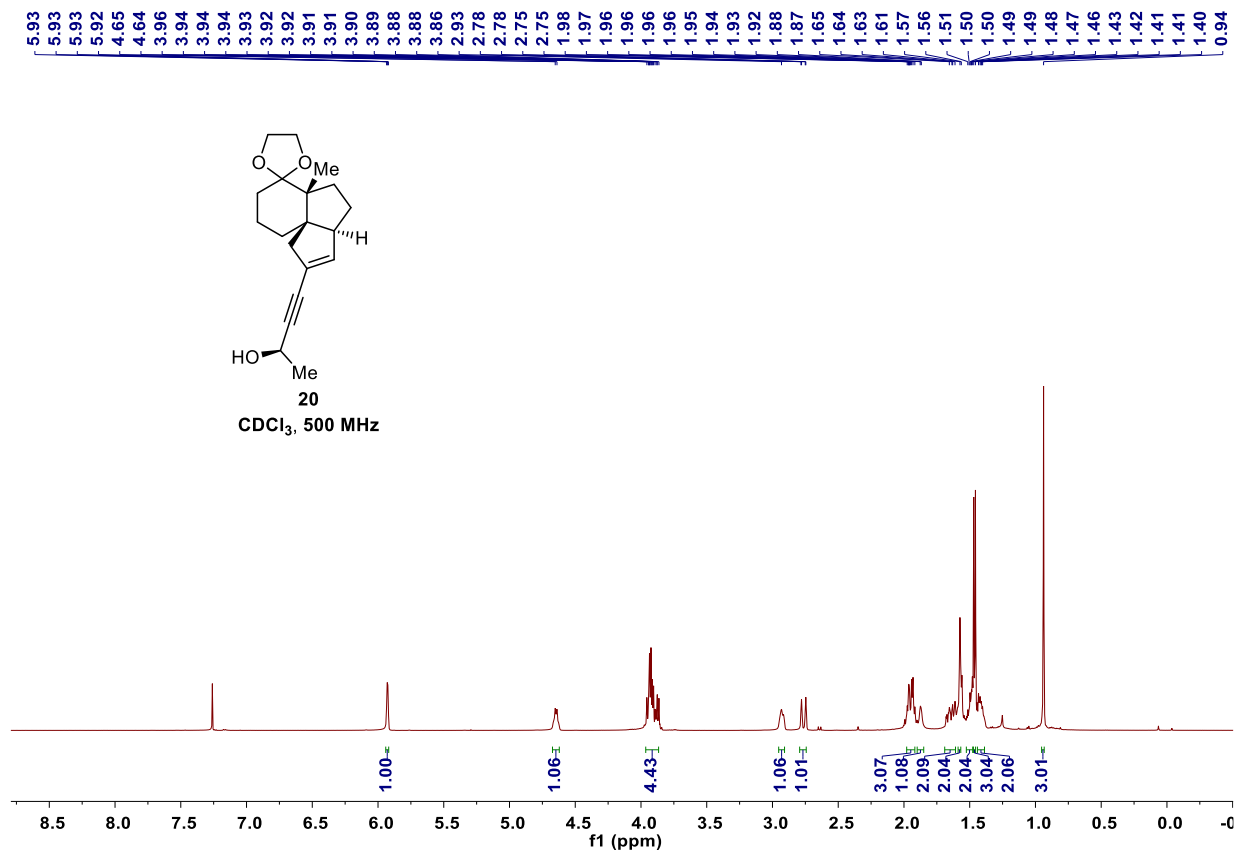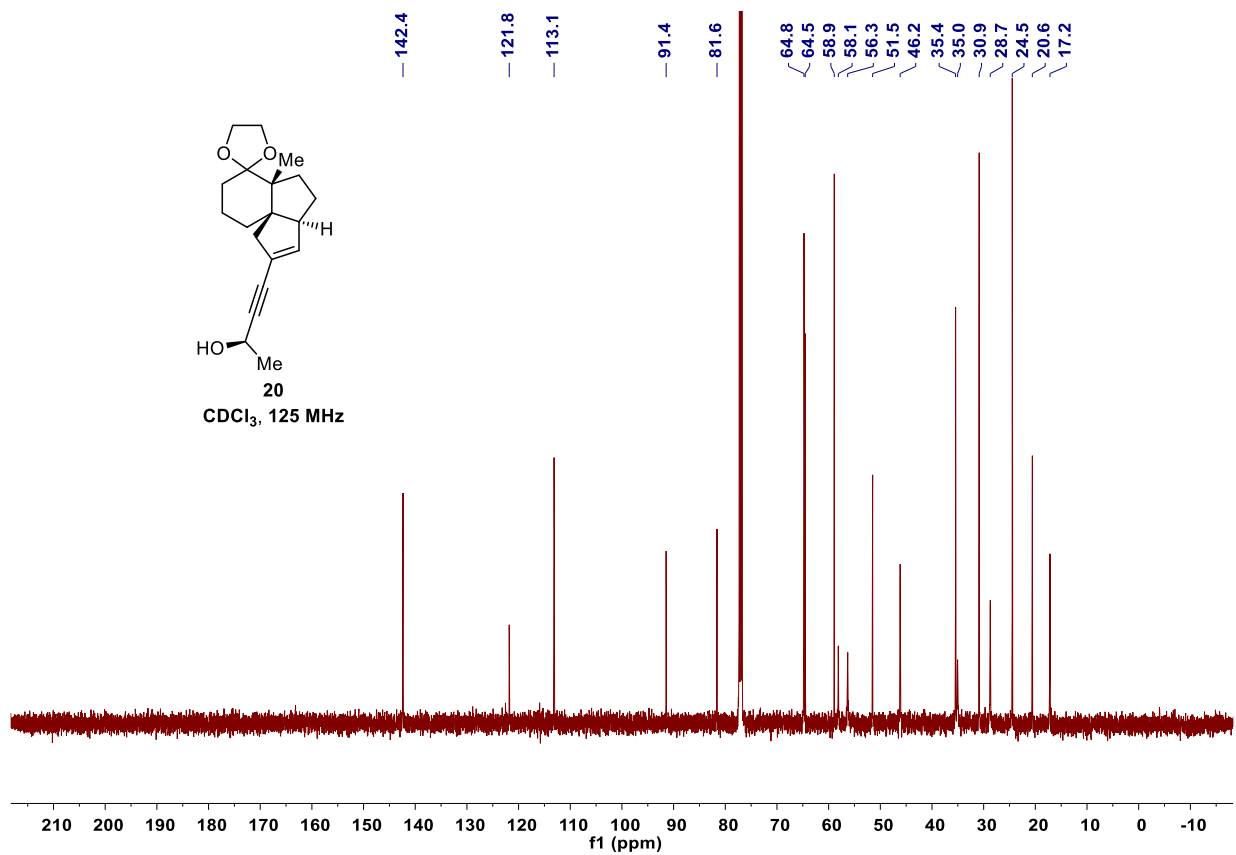

Supplementary Fig. S19. <sup>1</sup>H and <sup>13</sup>C NMR Spectra of 20

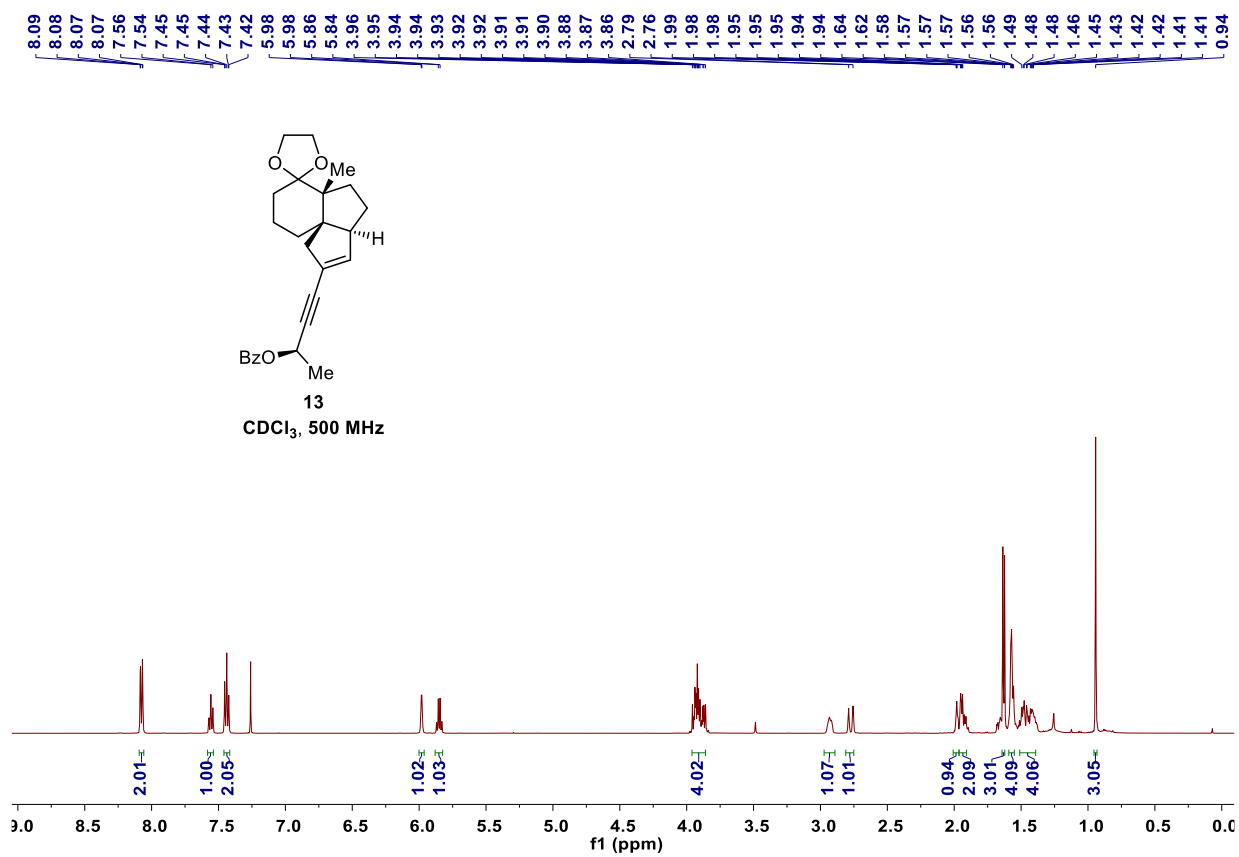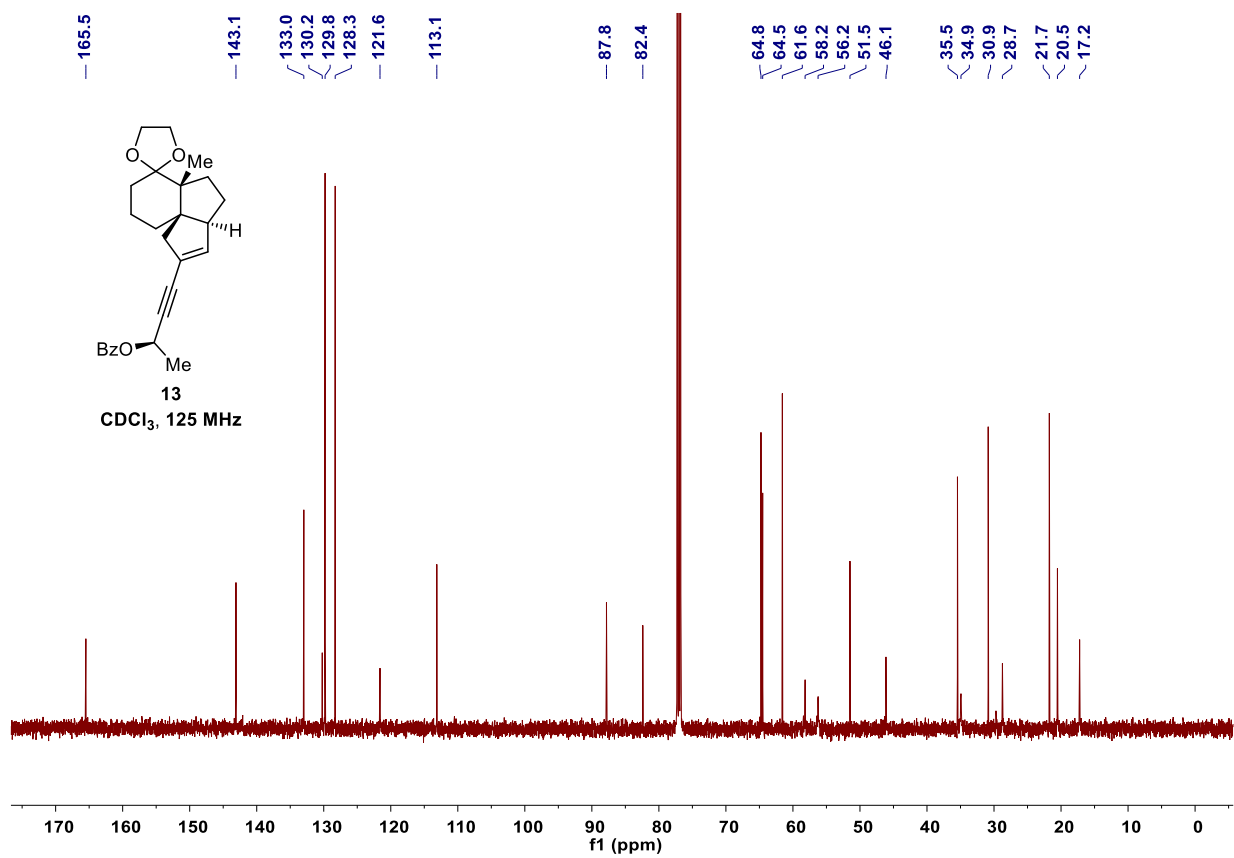

Supplementary Fig. S20.  $^1\text{H}$  and  $^{13}\text{C}$  NMR Spectra of **13**

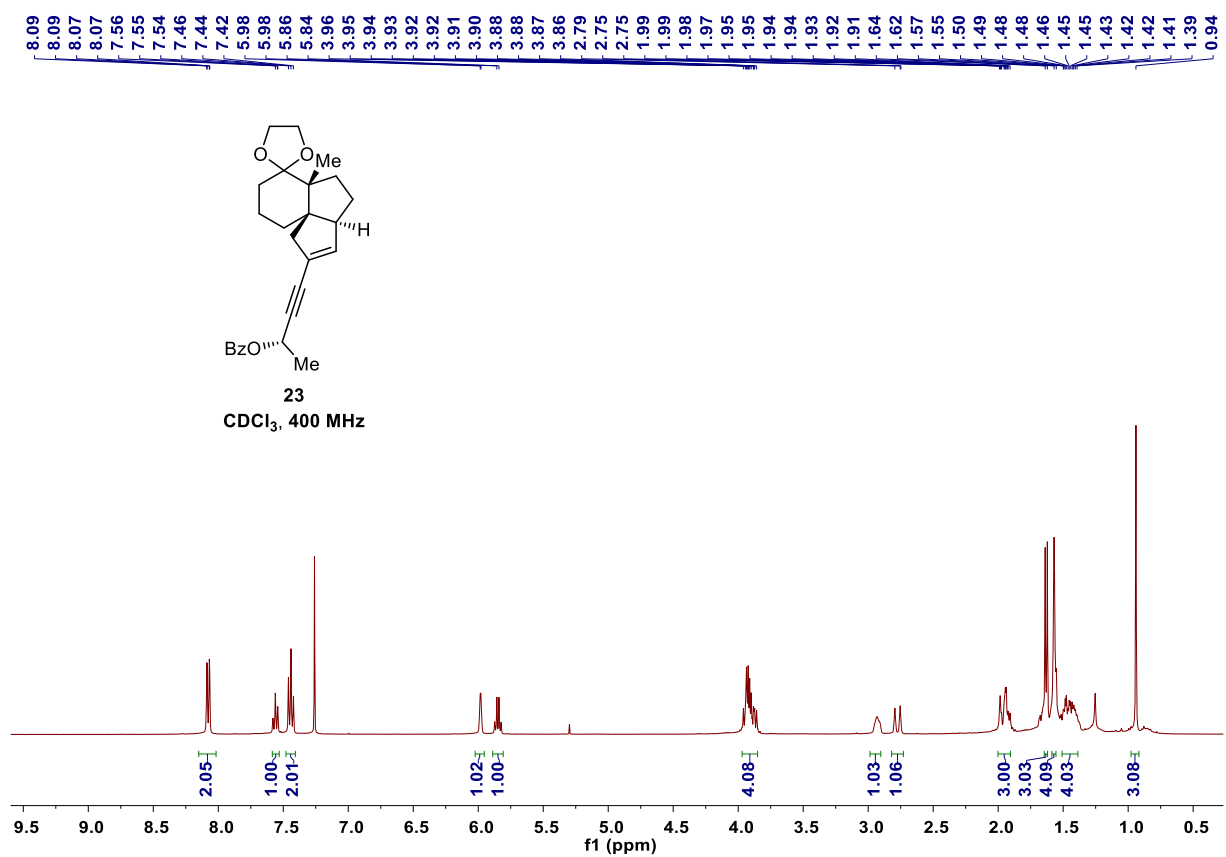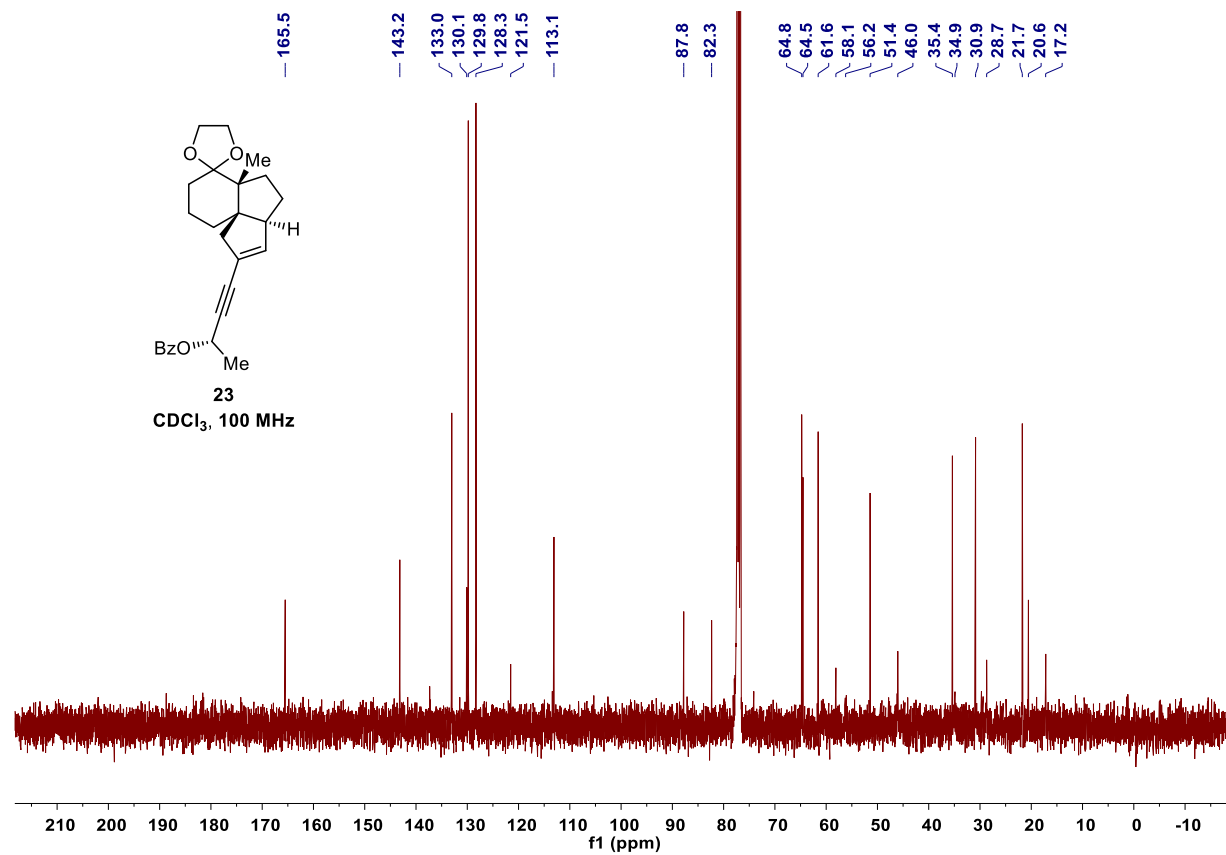

Supplementary Fig. S21. <sup>1</sup>H and <sup>13</sup>C NMR Spectra of 23

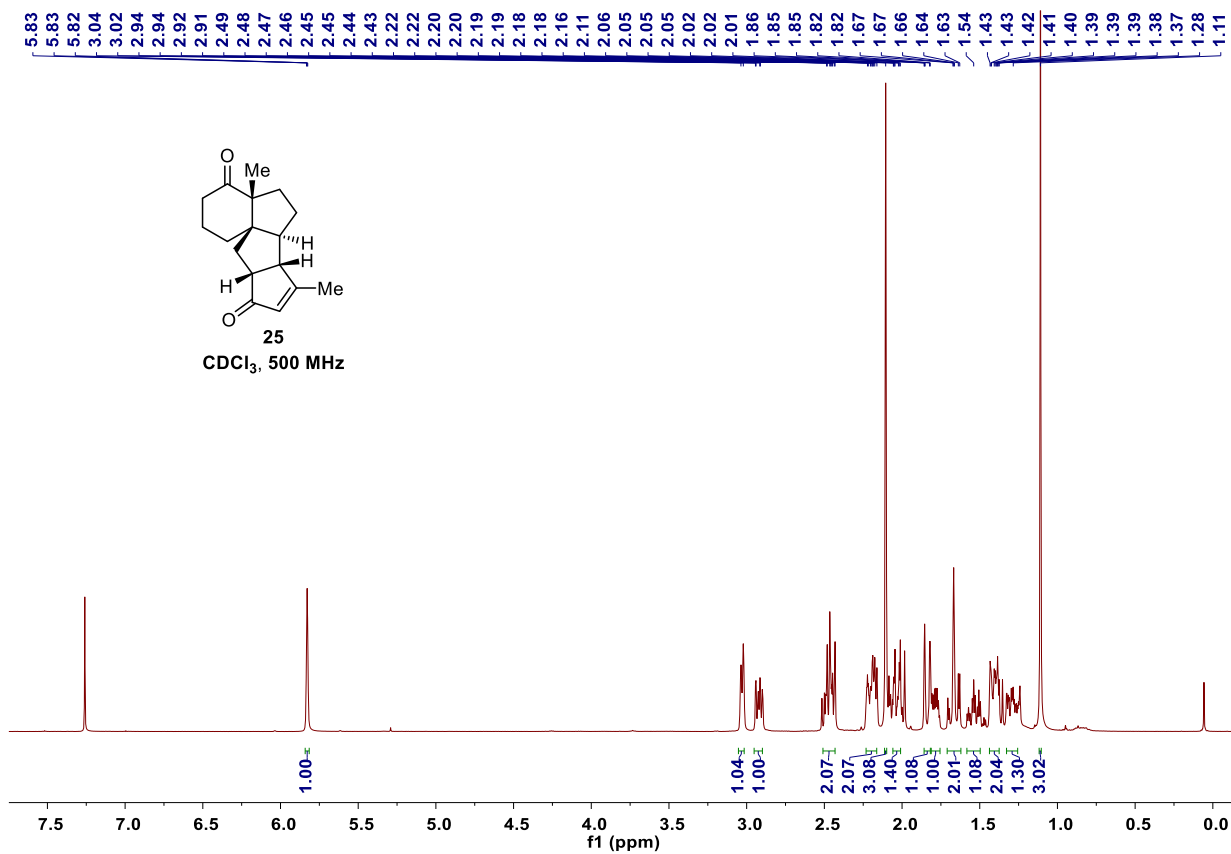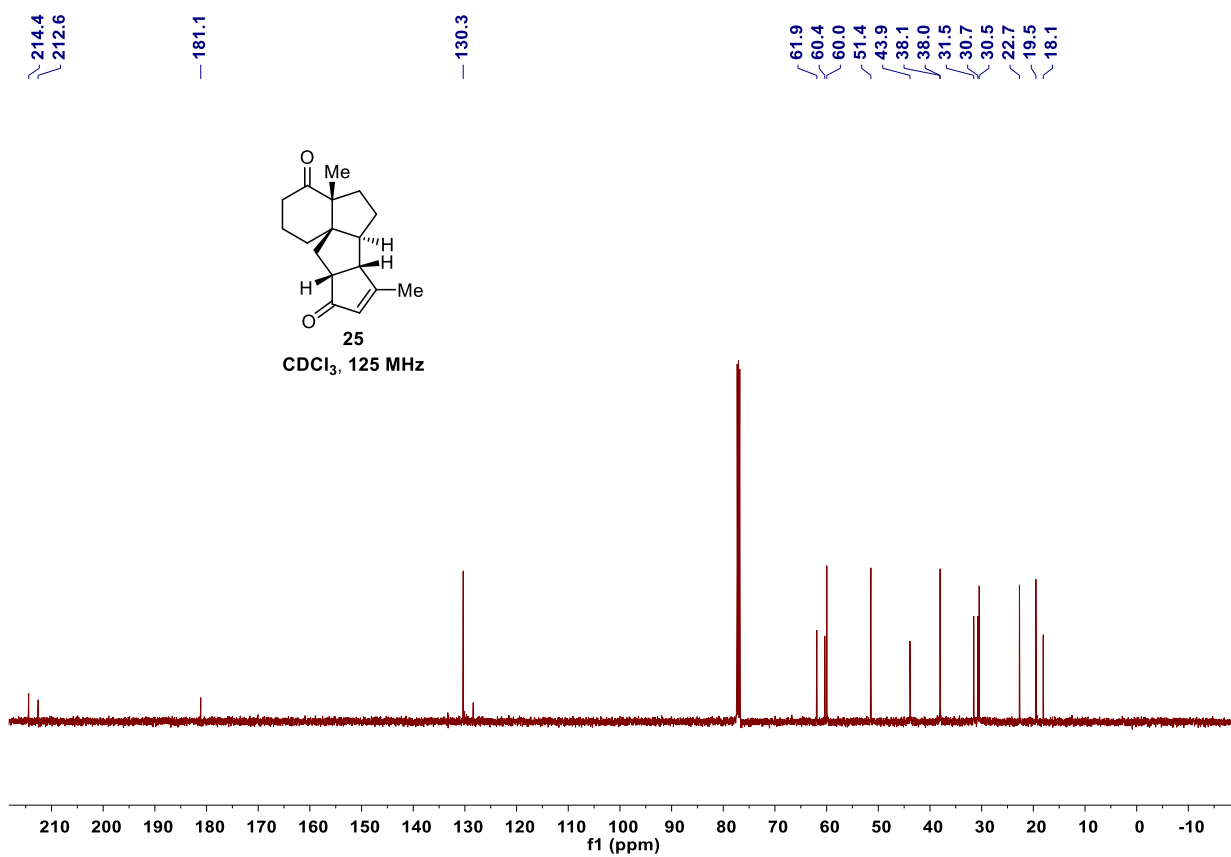

Supplementary Fig. S22. <sup>1</sup>H and <sup>13</sup>C NMR Spectra of 25

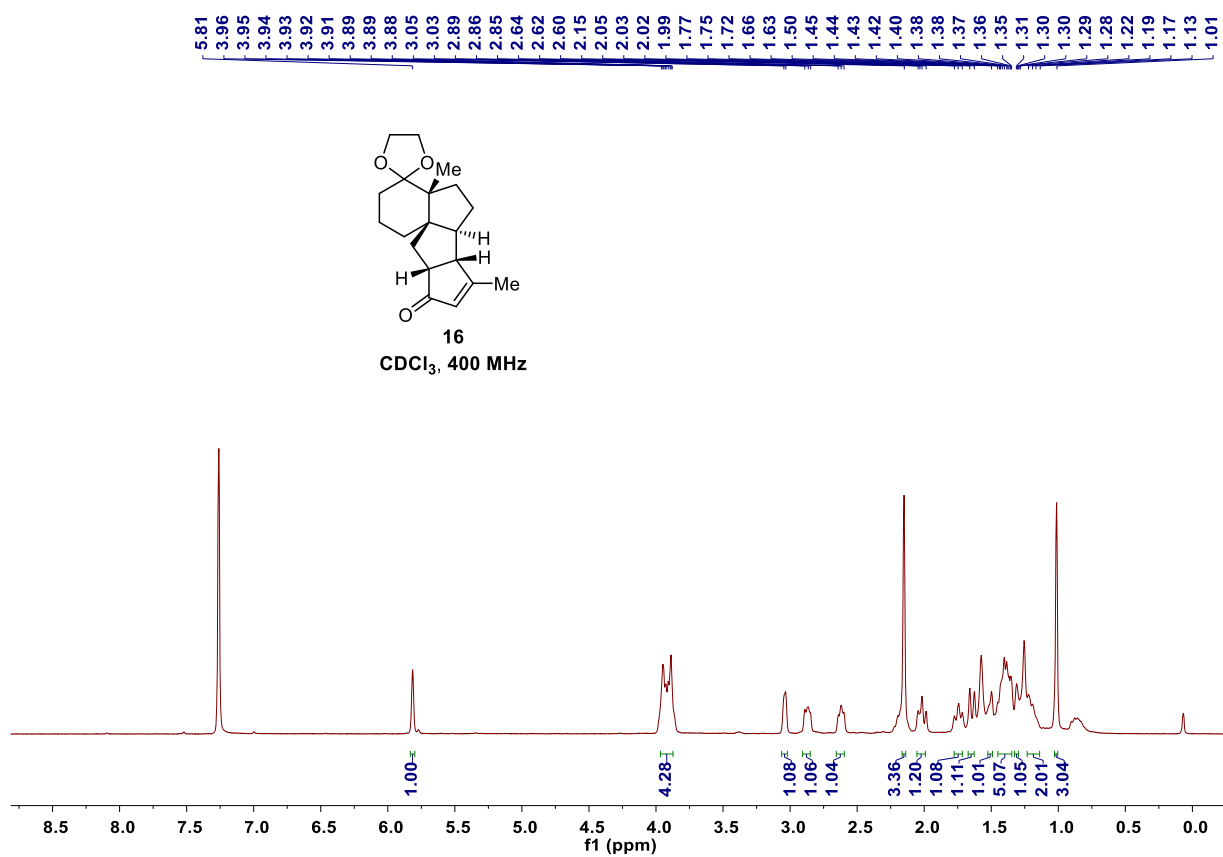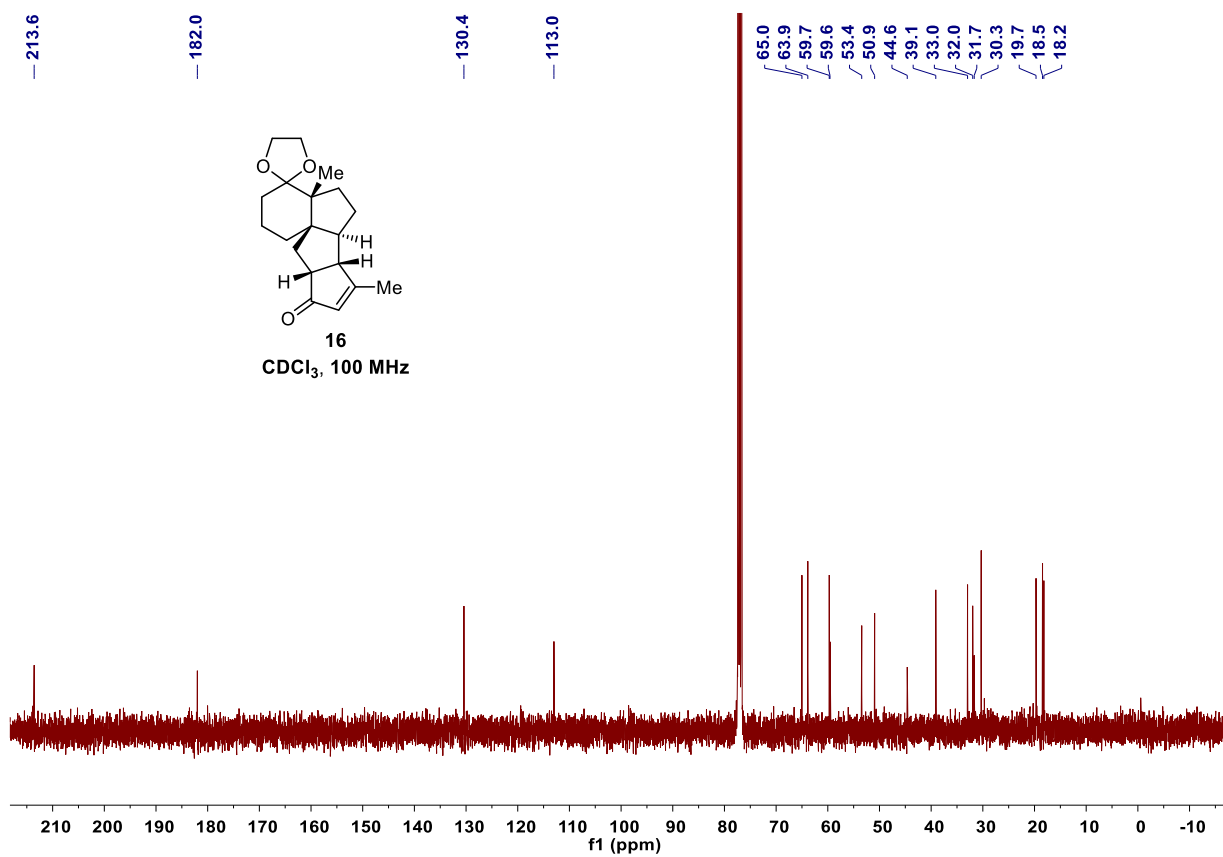

Supplementary Fig. S23. <sup>1</sup>H and <sup>13</sup>C NMR Spectra of 16



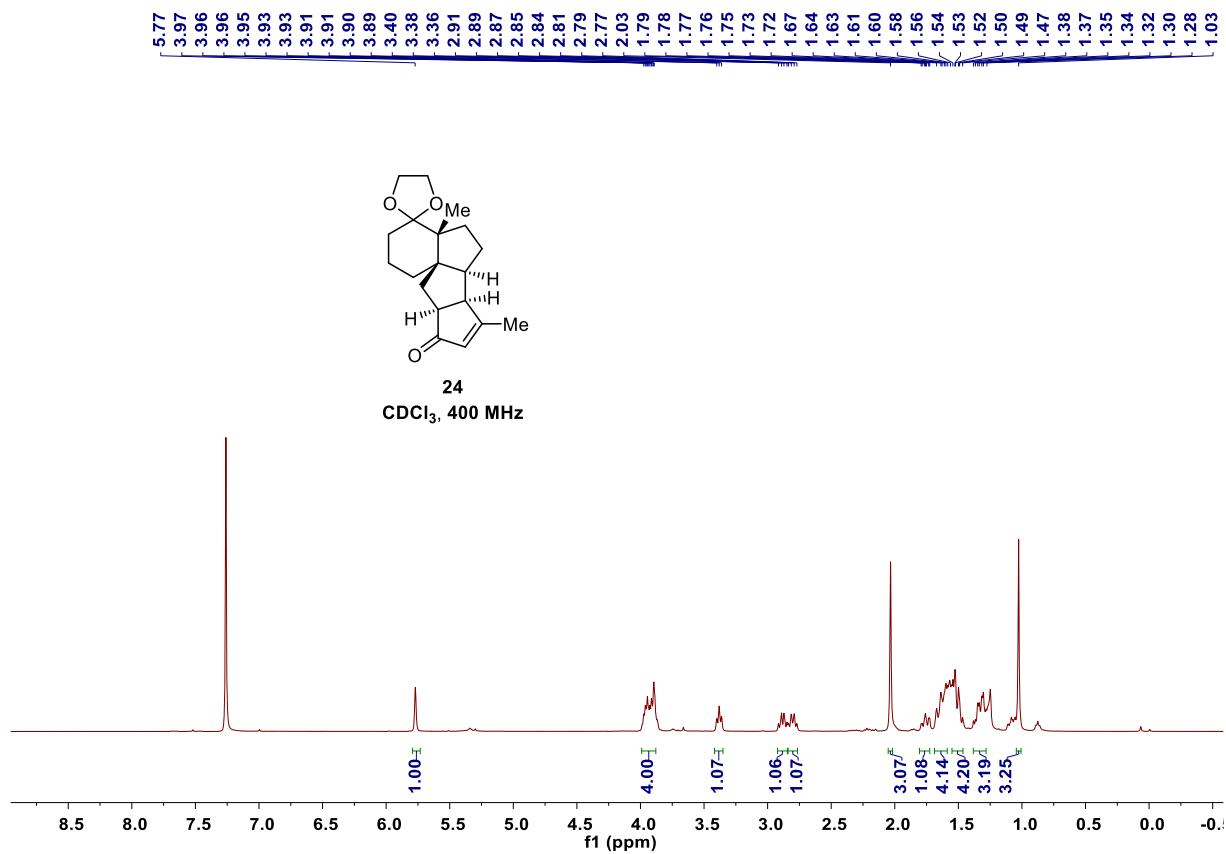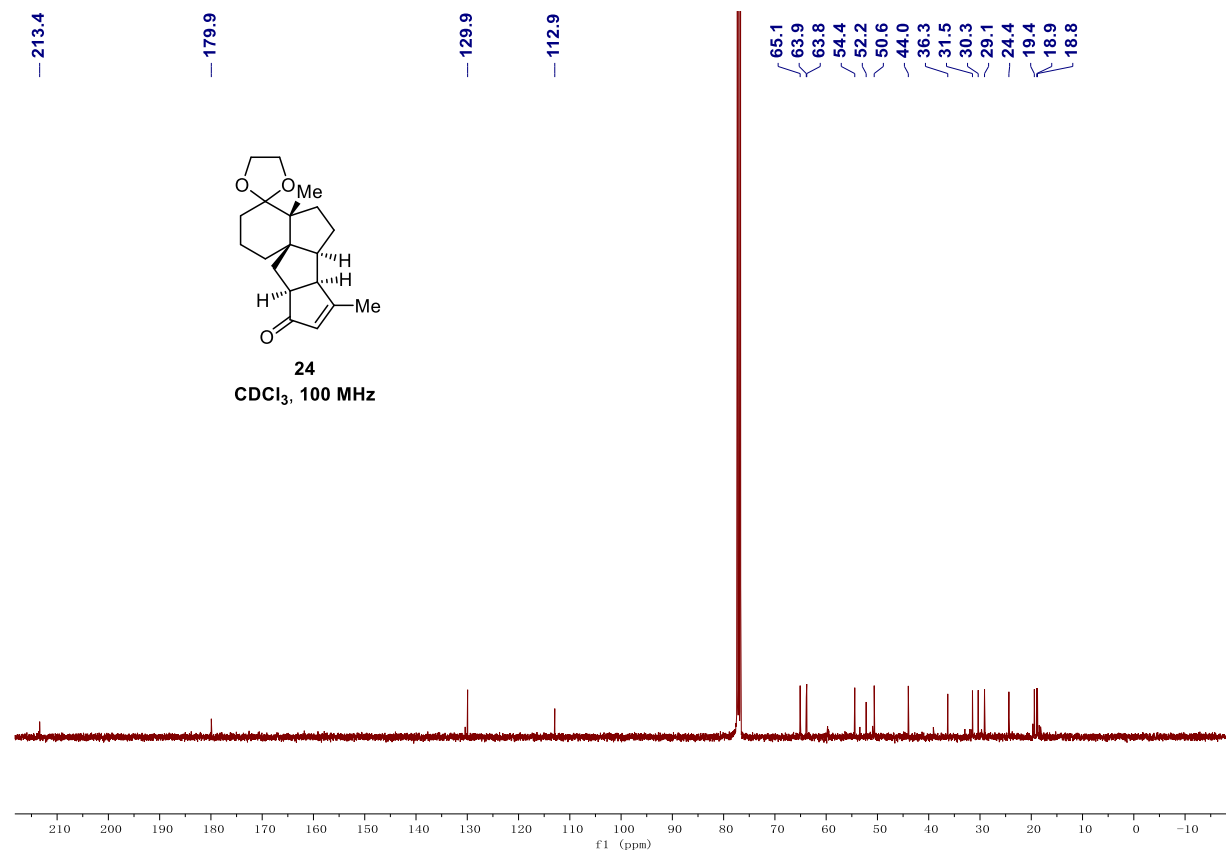

Supplementary Fig. S24. <sup>1</sup>H and <sup>13</sup>C NMR Spectra of 24

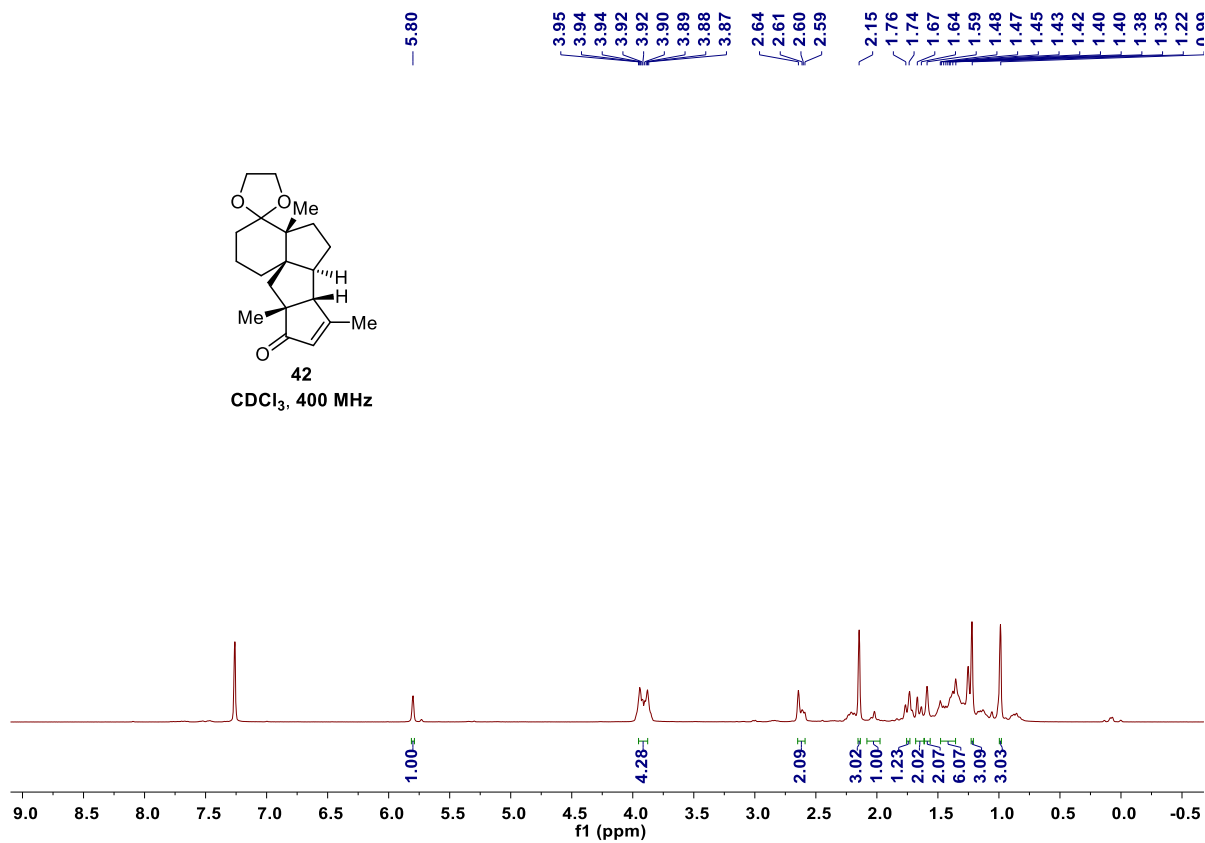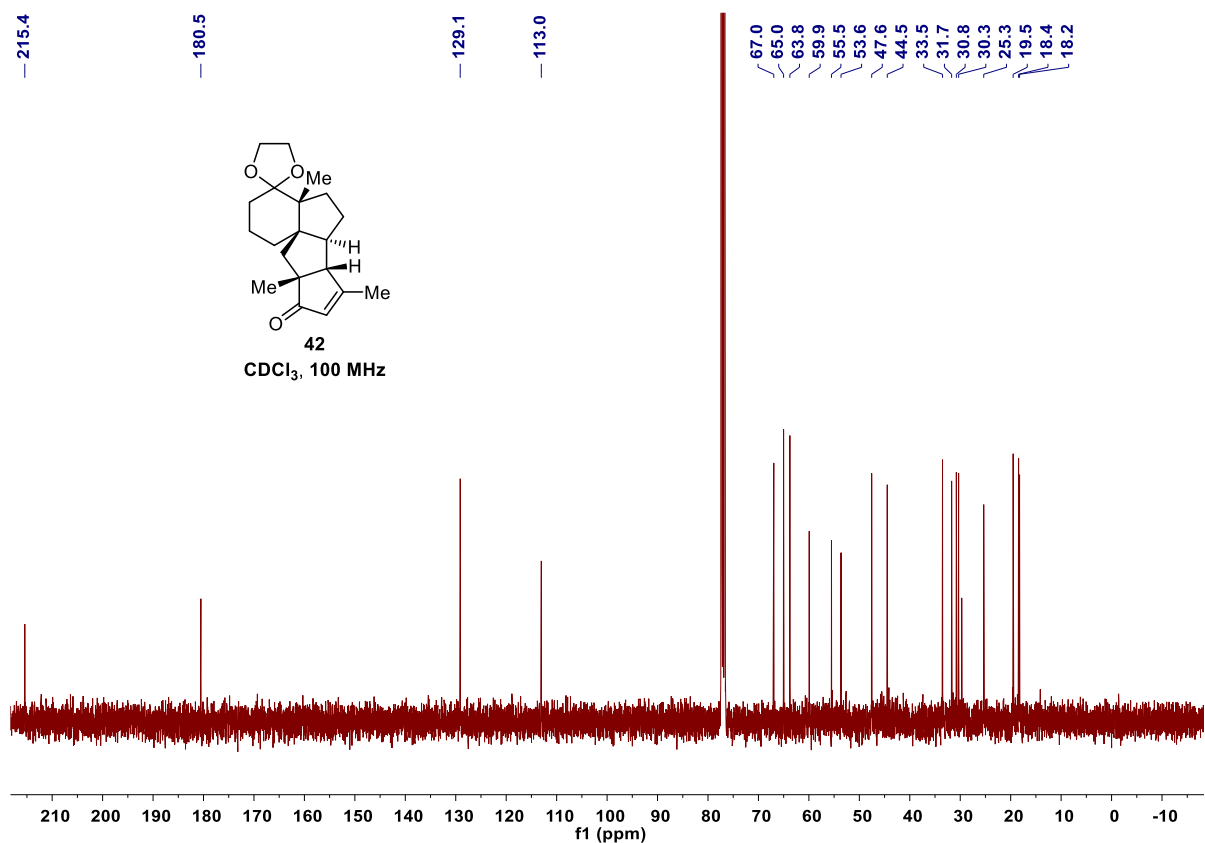

Supplementary Fig. S25.  $^1\text{H}$  and  $^{13}\text{C}$  NMR Spectra of **42**

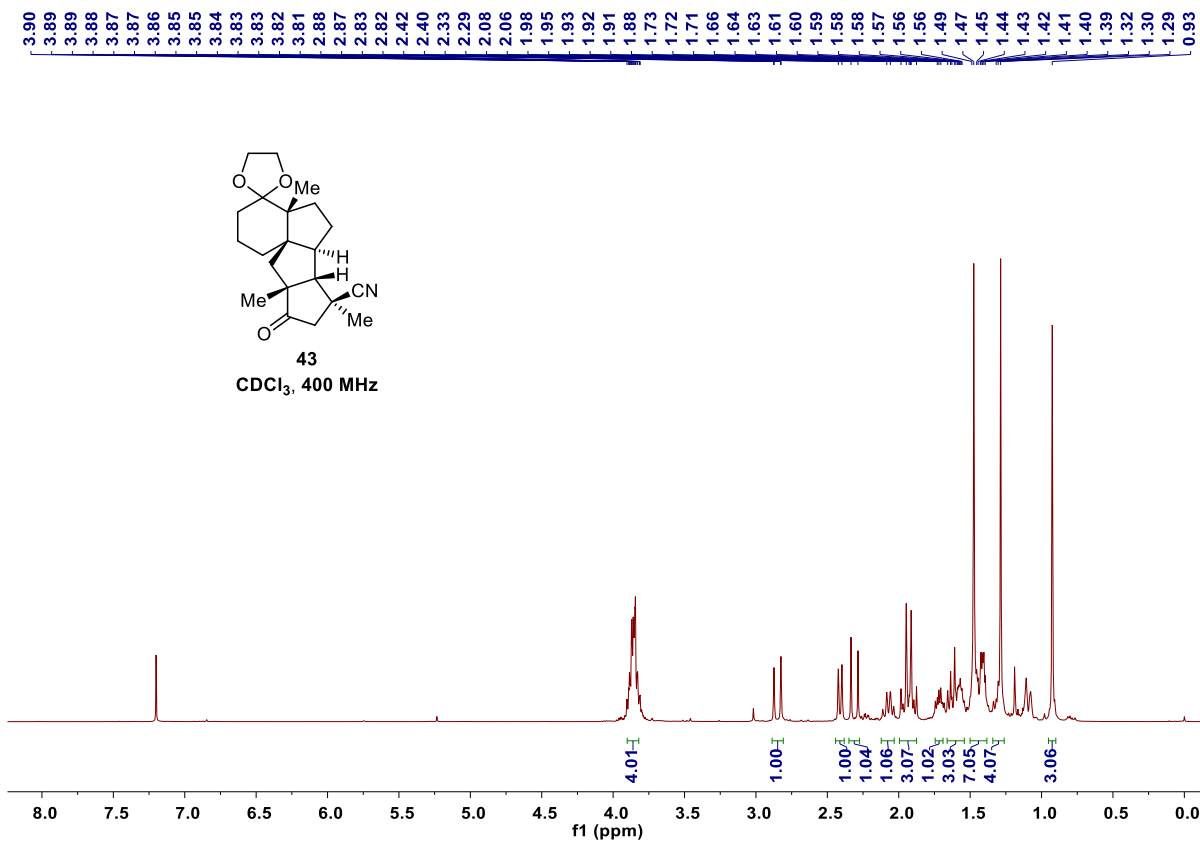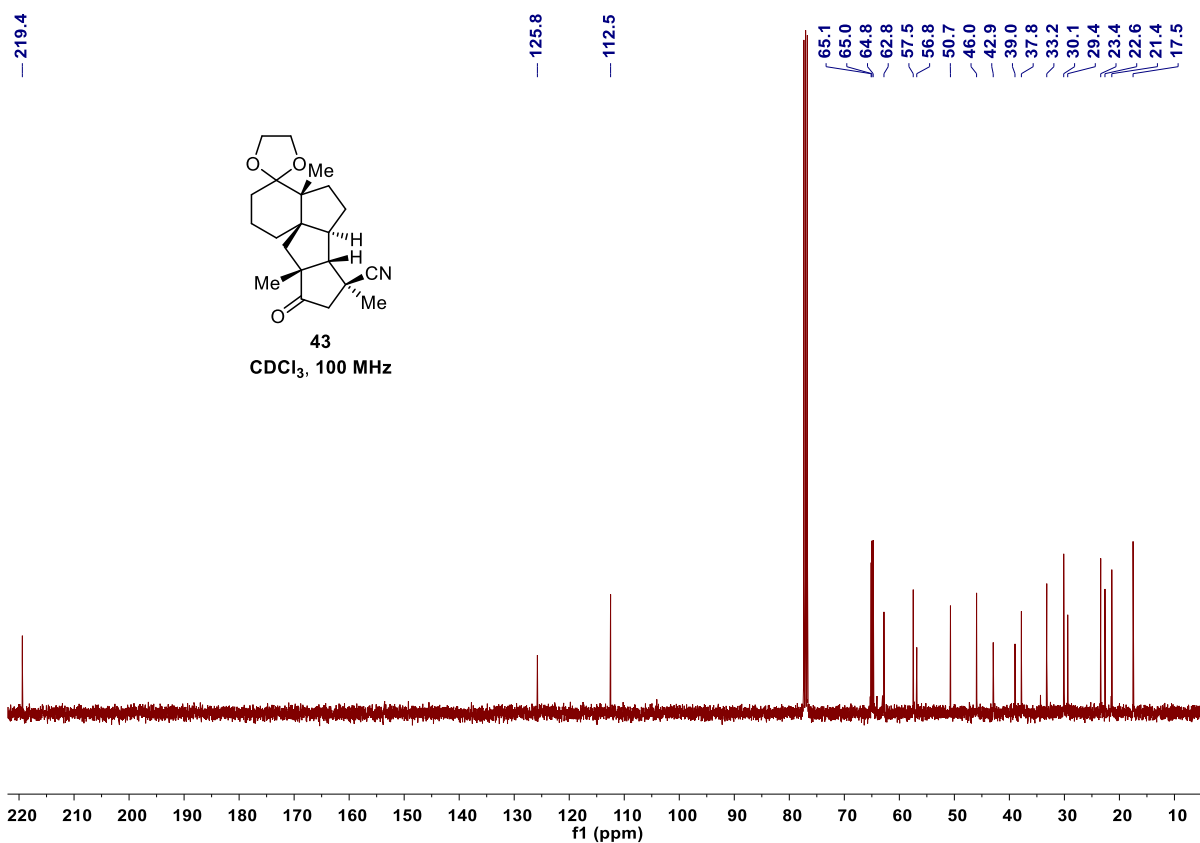

Supplementary Fig. S26.  $^1\text{H}$  and  $^{13}\text{C}$  NMR Spectra of 43

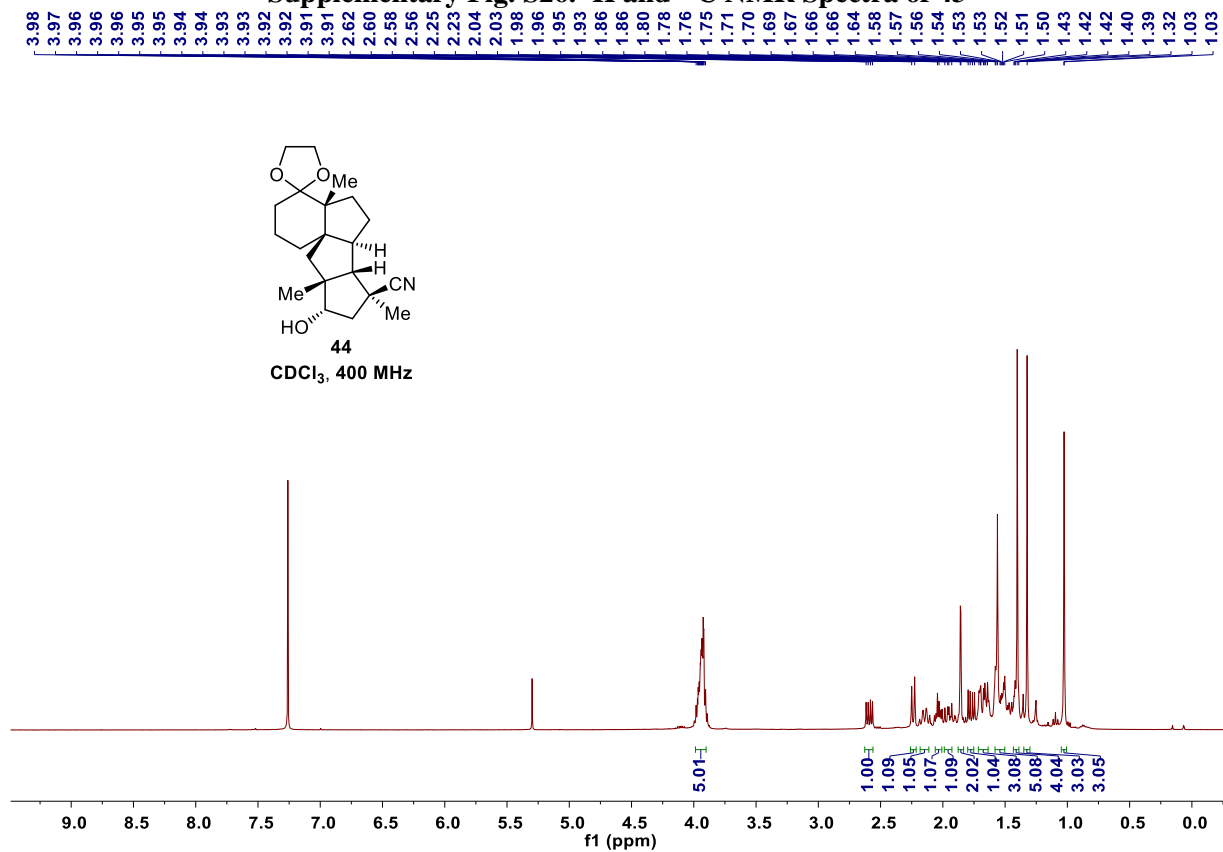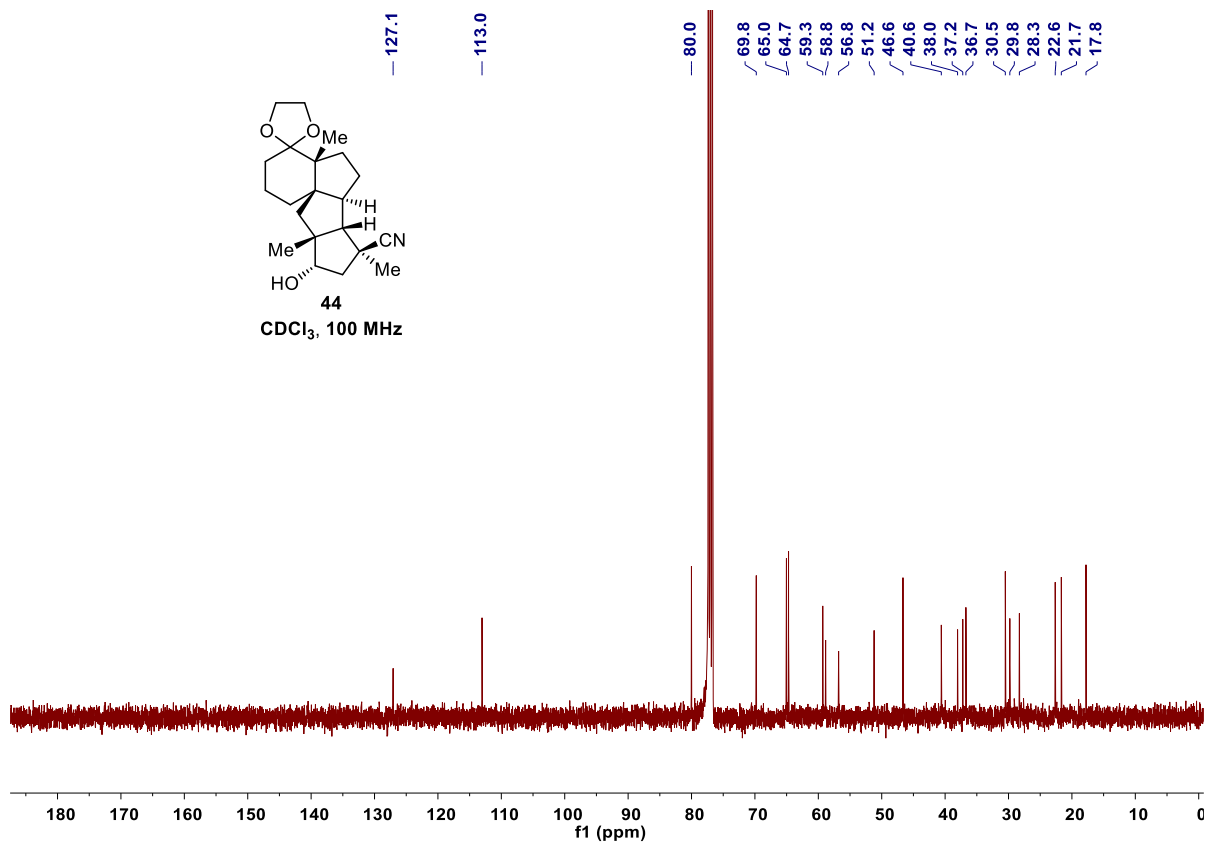

Supplementary Fig. S27.  $^1\text{H}$  and  $^{13}\text{C}$  NMR Spectra of 44

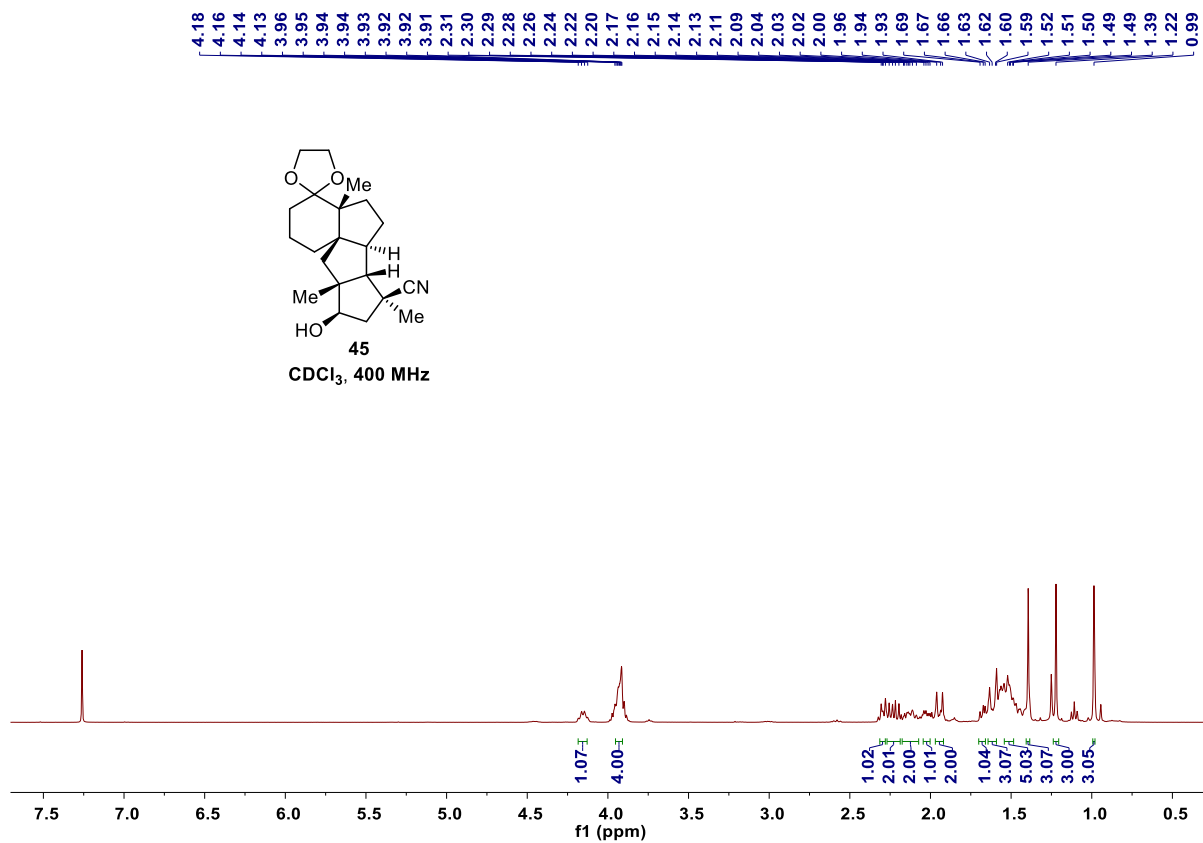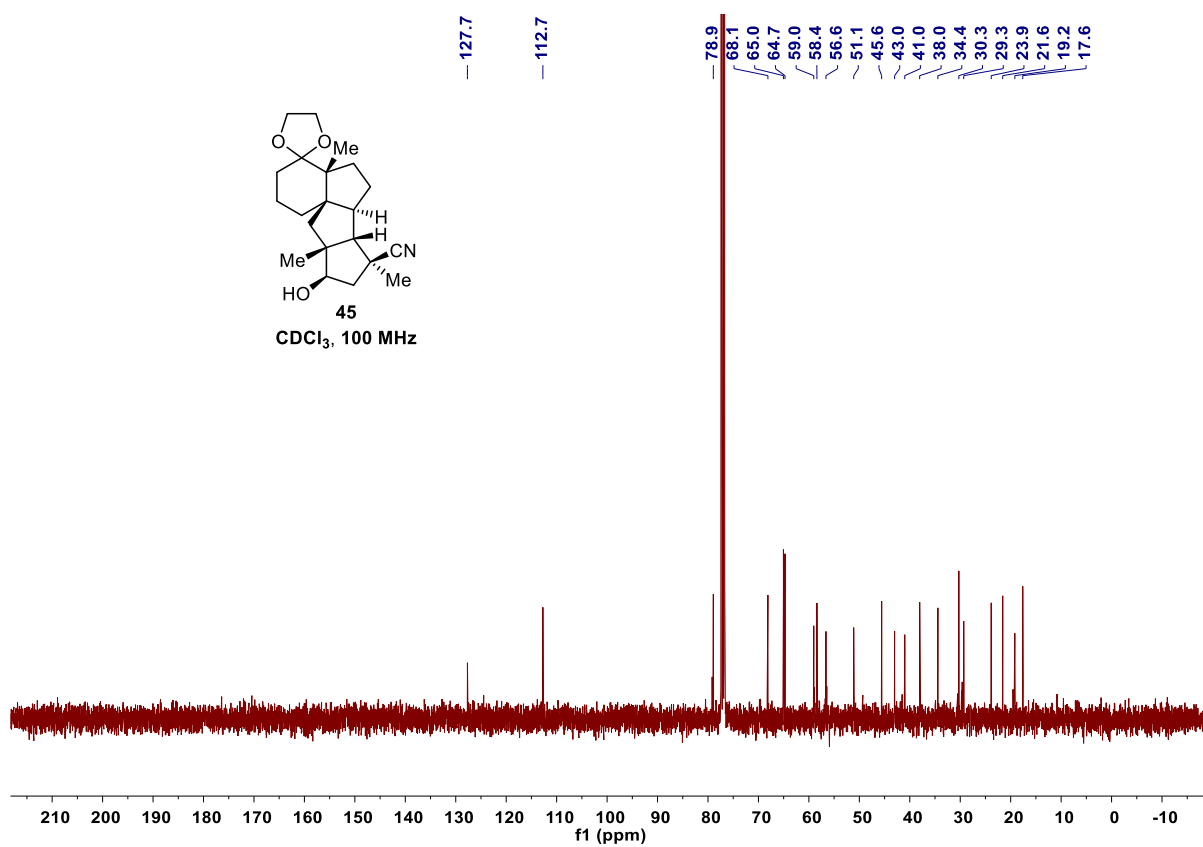

Supplementary Fig. S28. <sup>1</sup>H and <sup>13</sup>C NMR Spectra of **45**

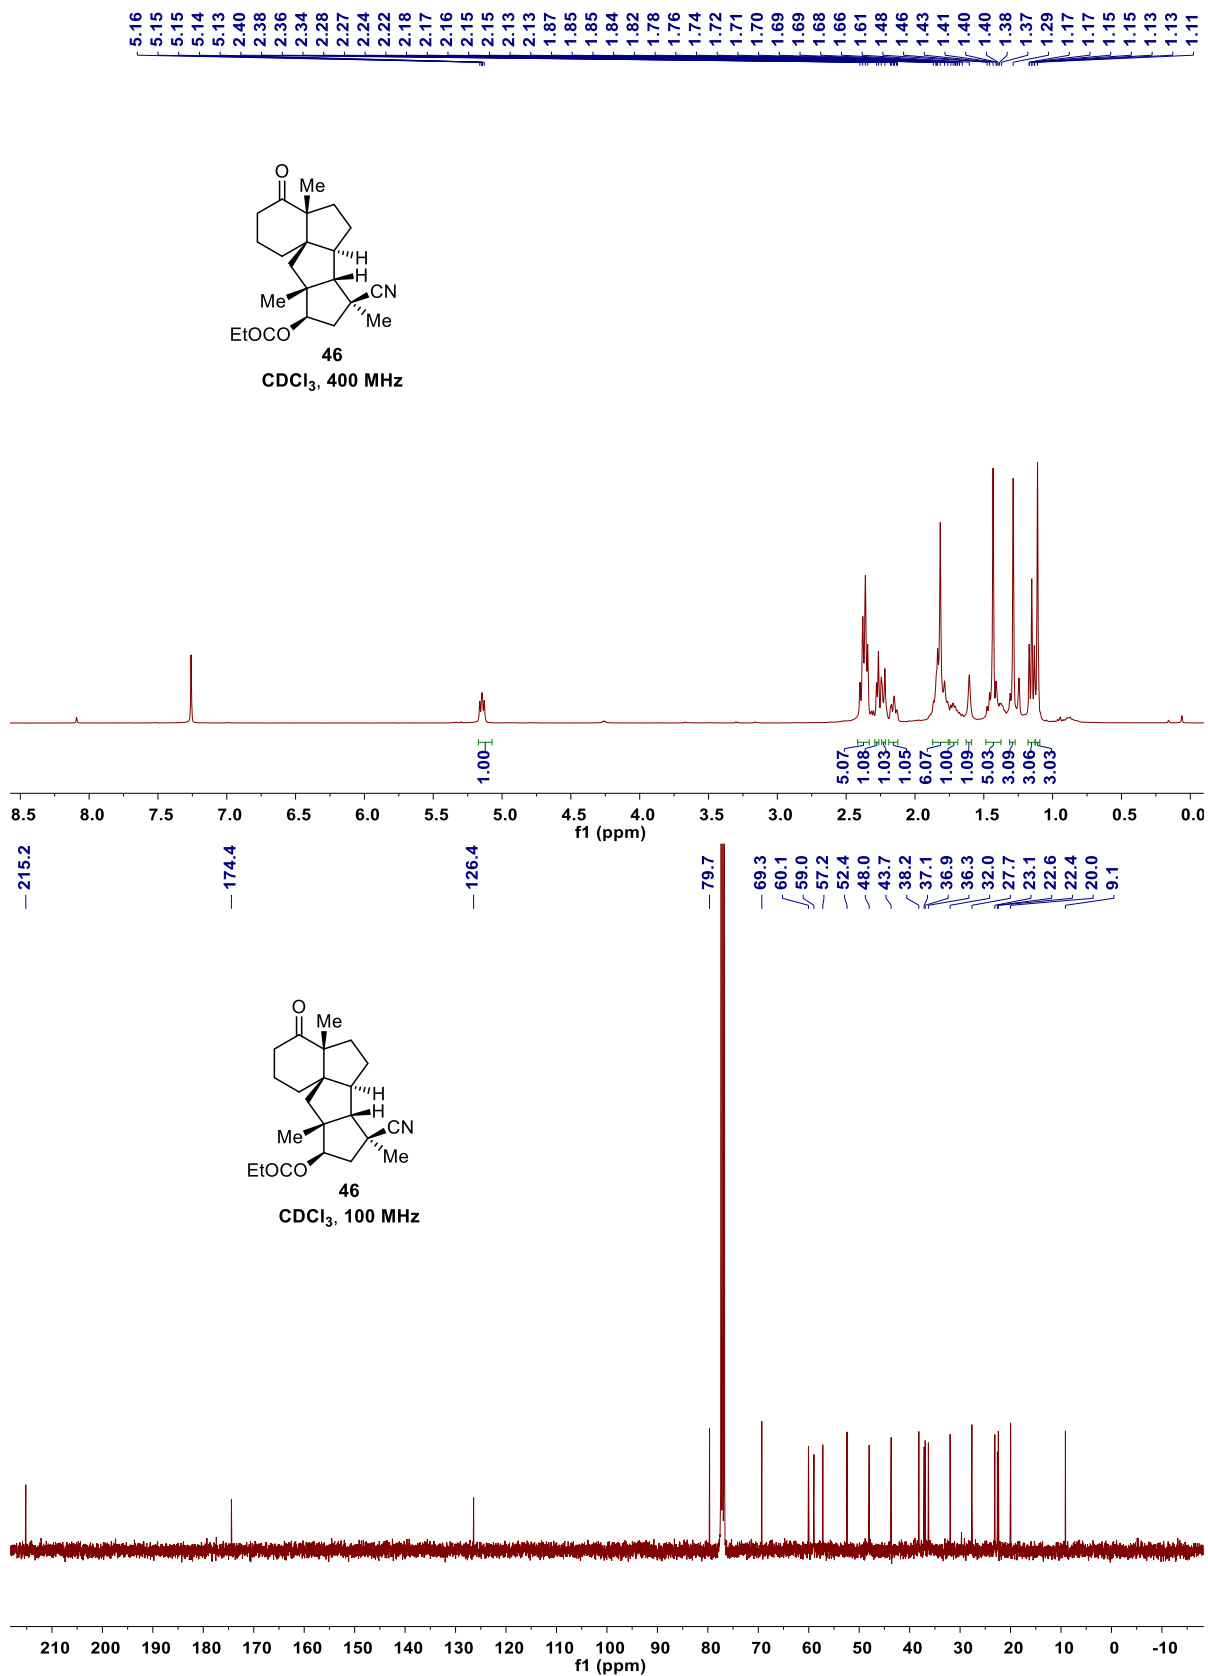

Supplementary Fig. S29. <sup>1</sup>H and <sup>13</sup>C NMR Spectra of 46

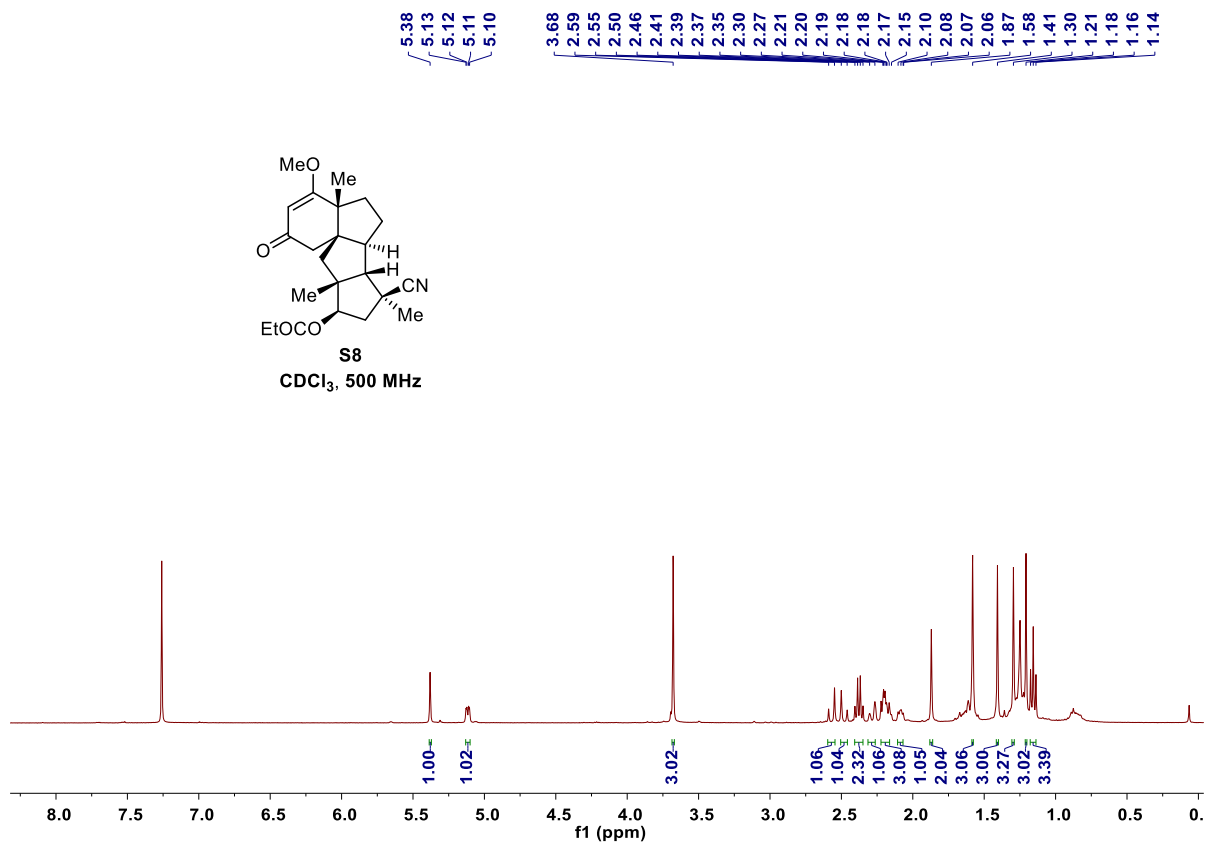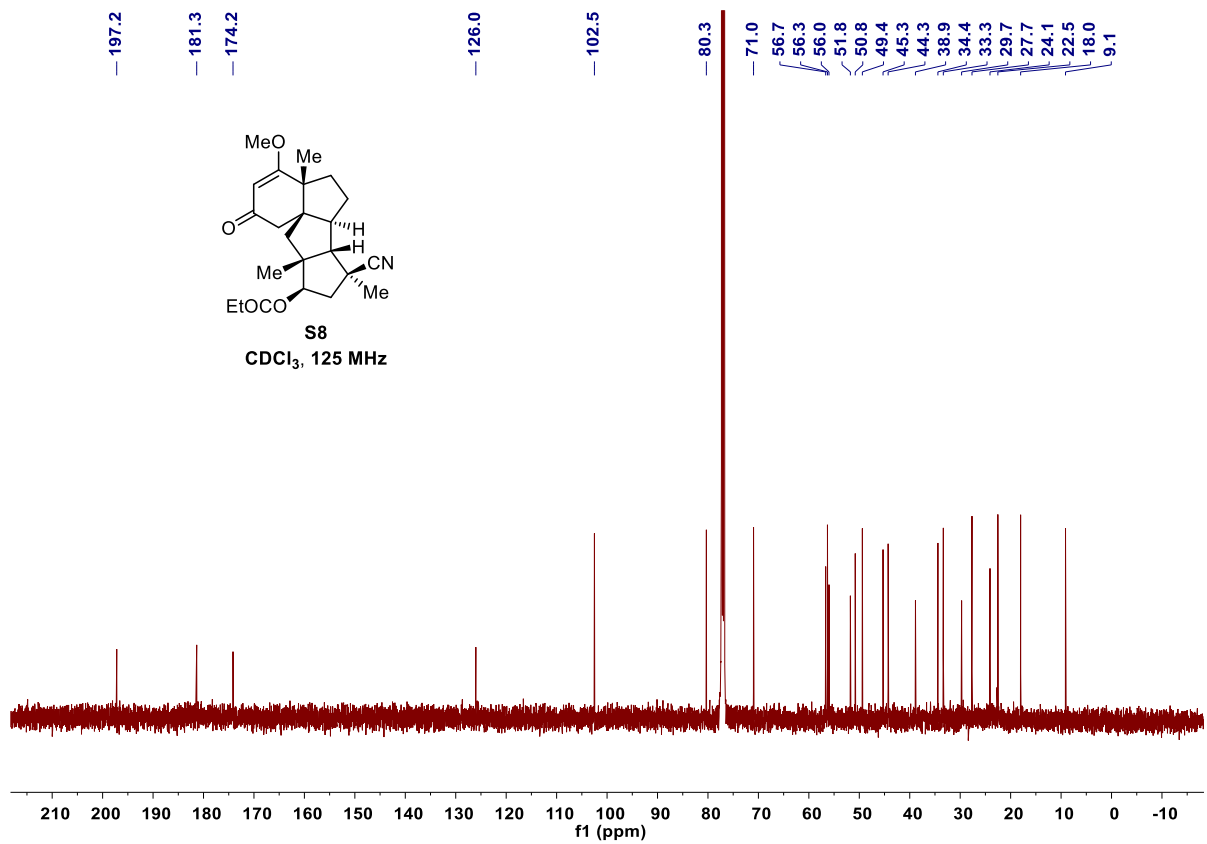

Supplementary Fig. S30.  $^1\text{H}$  and  $^{13}\text{C}$  NMR Spectra of S8

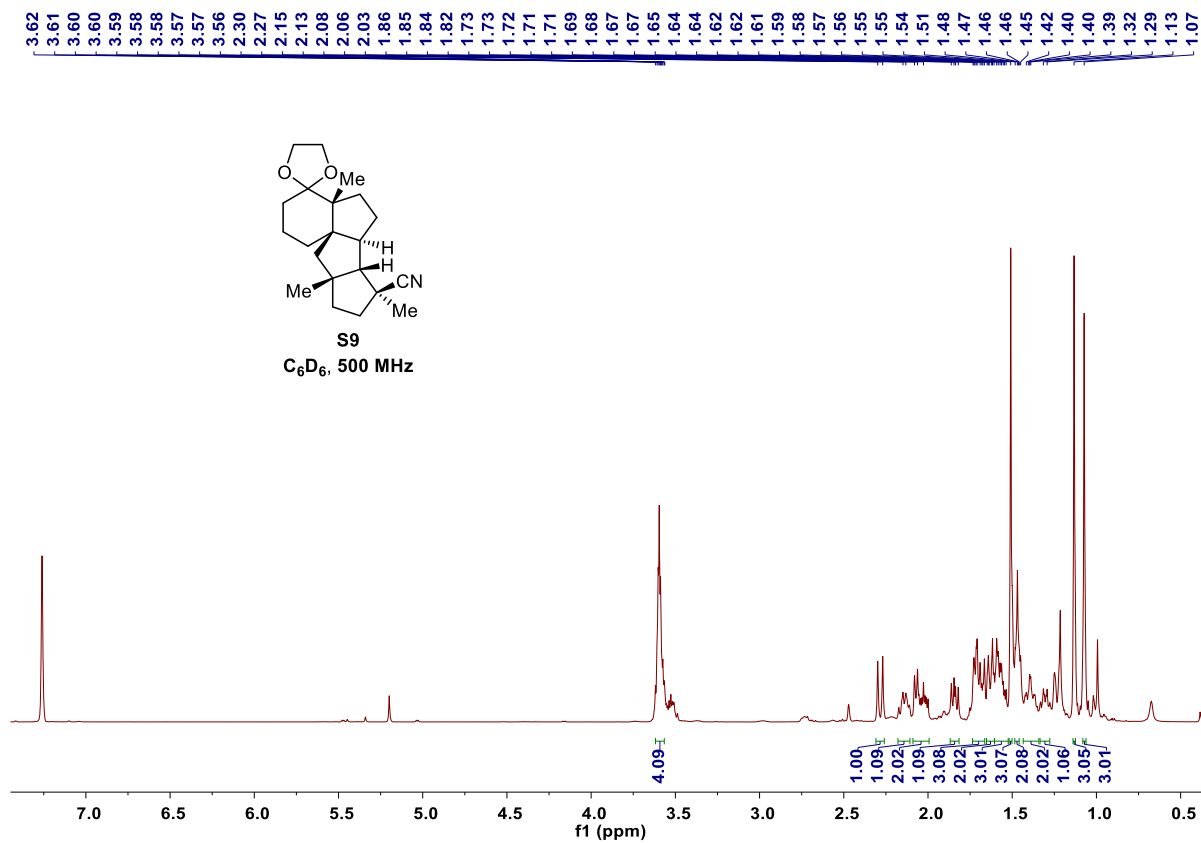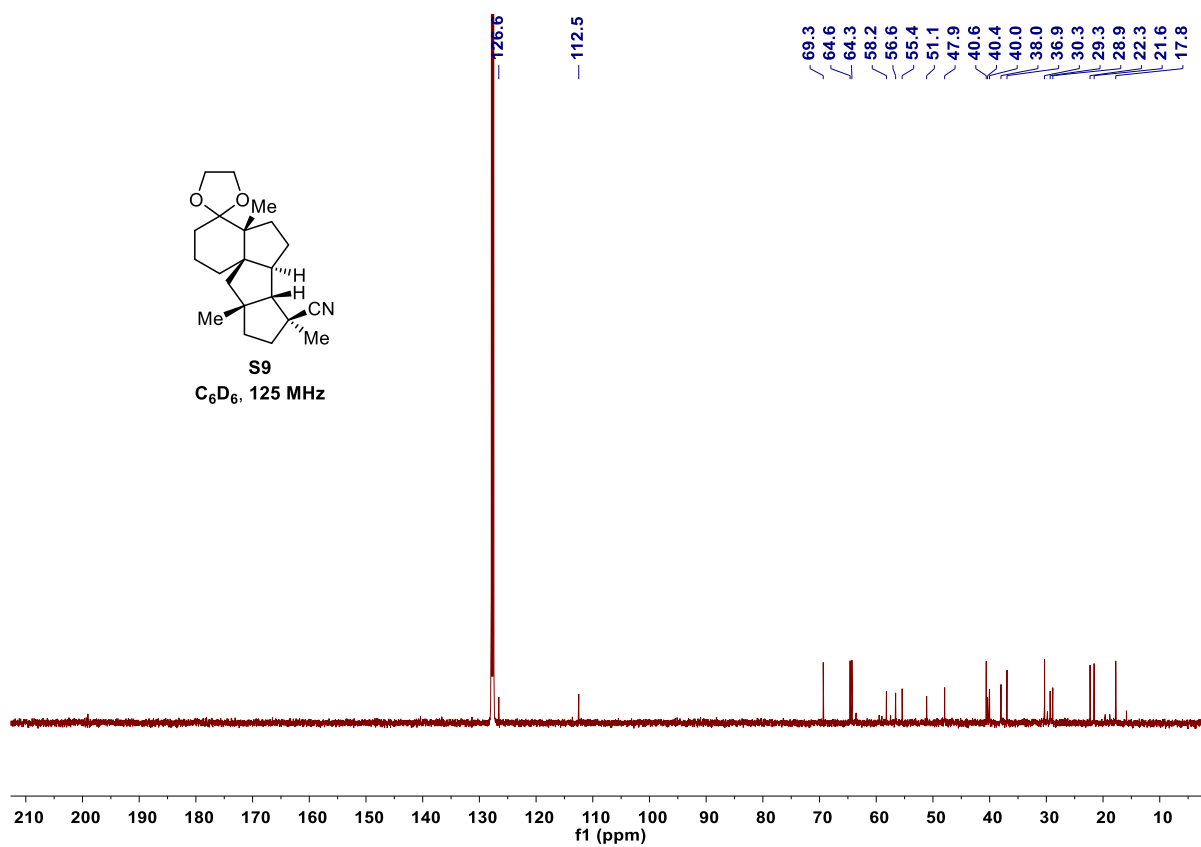

Supplementary Fig. S31. <sup>1</sup>H and <sup>13</sup>C NMR Spectra of S9



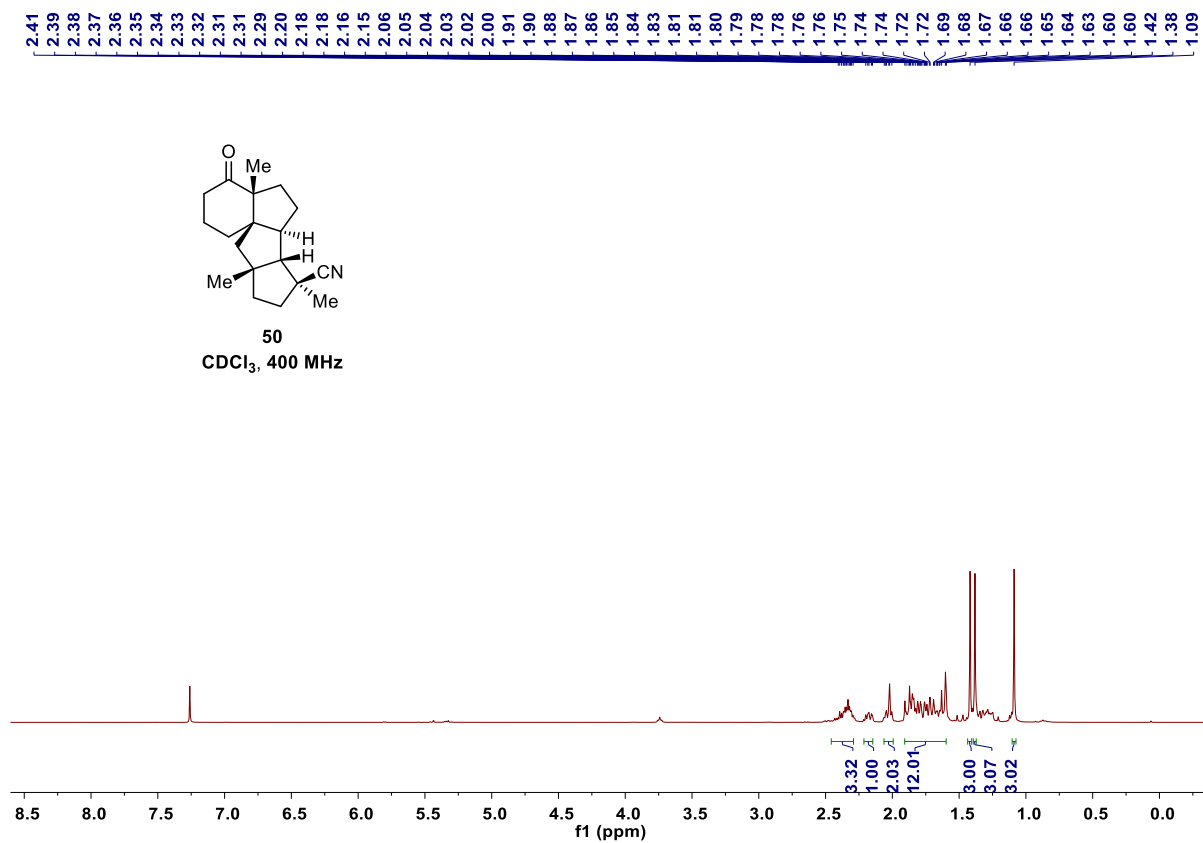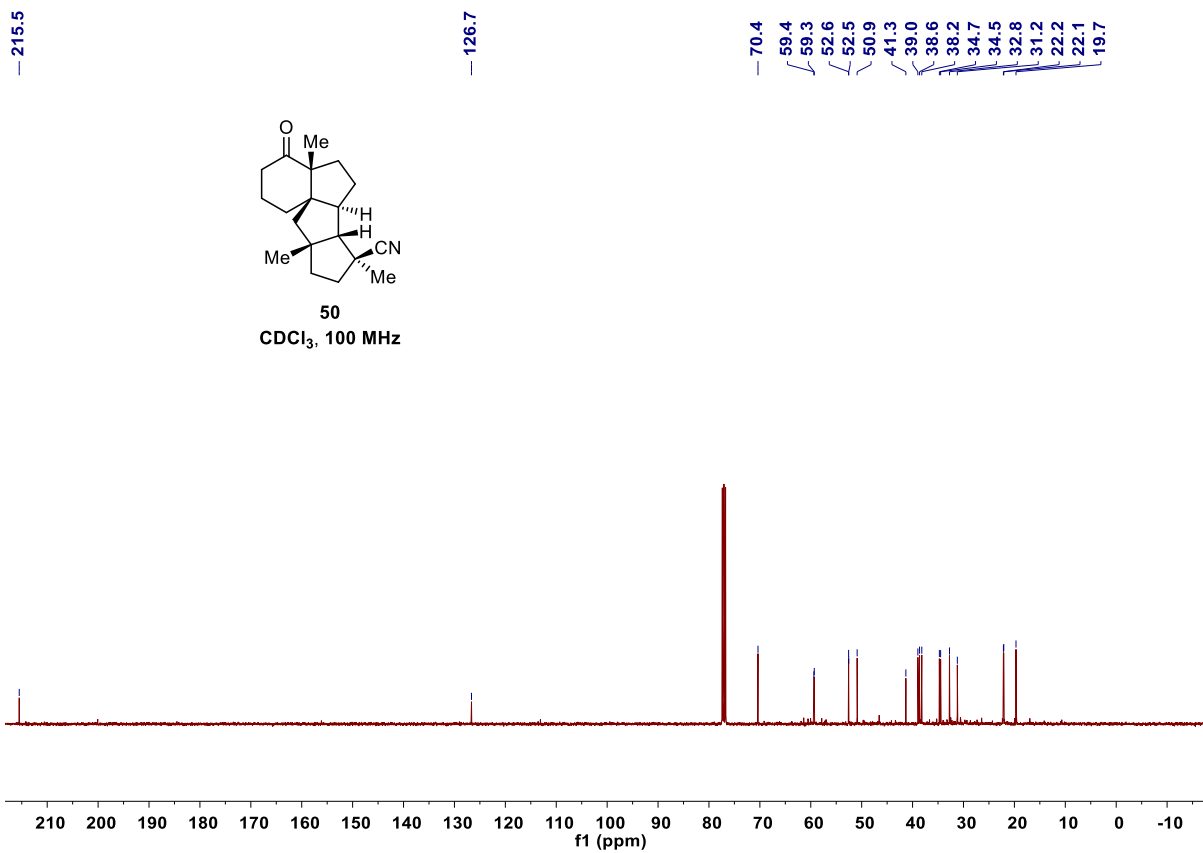

Supplementary Fig. S32. <sup>1</sup>H and <sup>13</sup>C NMR Spectra of 50

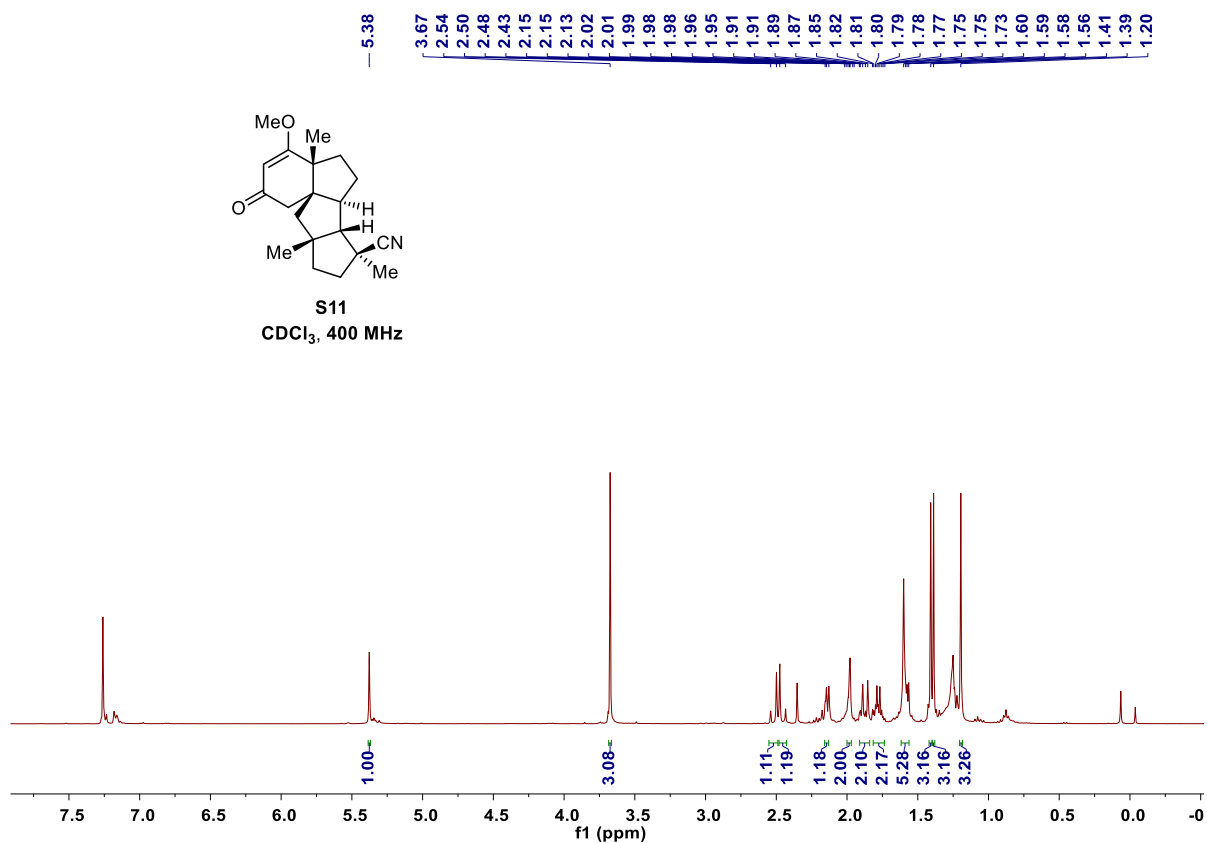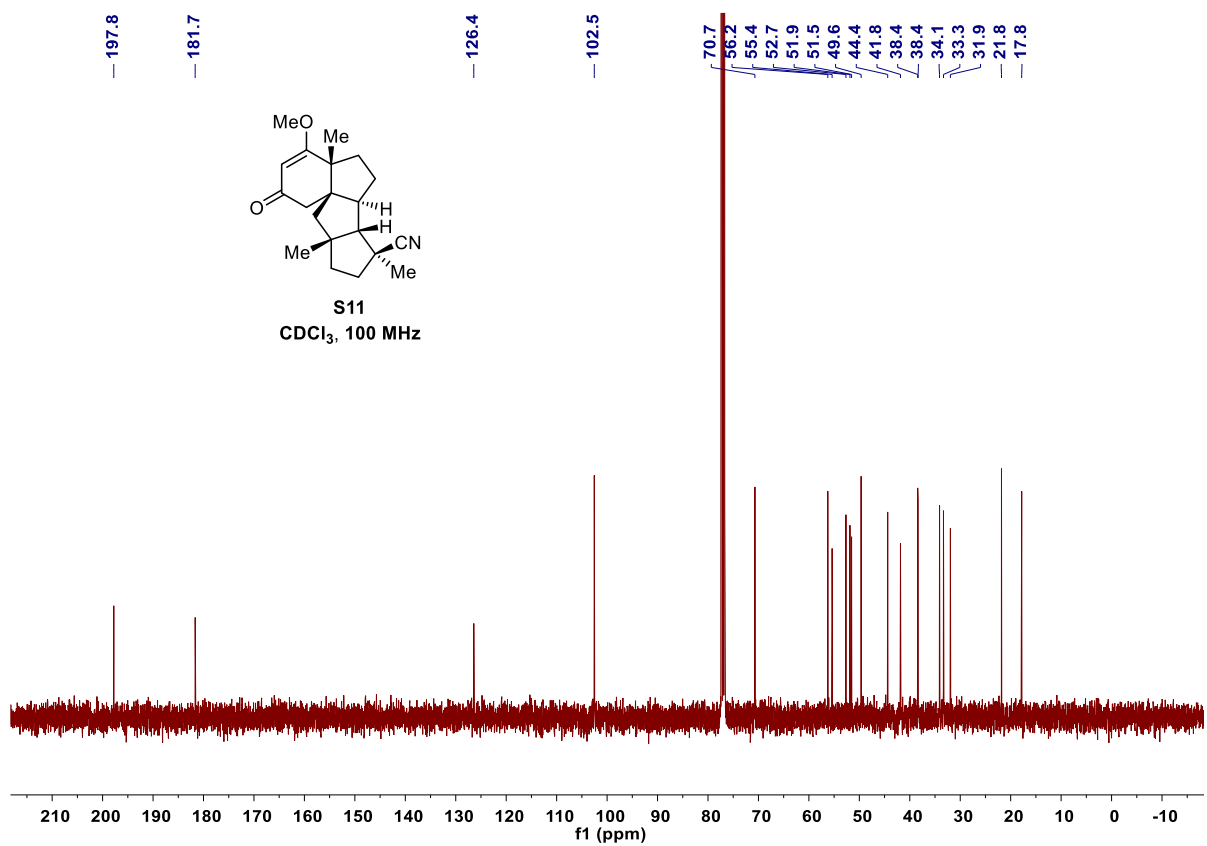

Supplementary Fig. S33.  $^1\text{H}$  and  $^{13}\text{C}$  NMR Spectra of S11

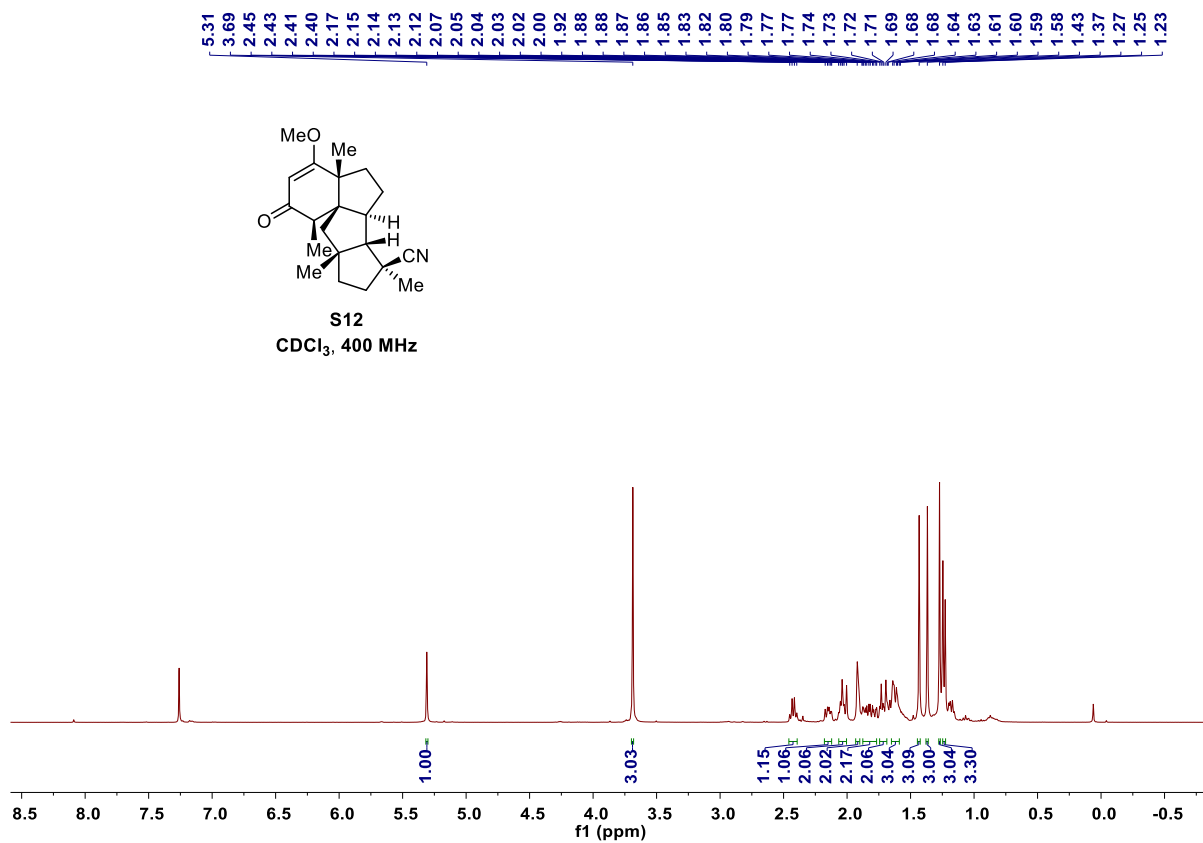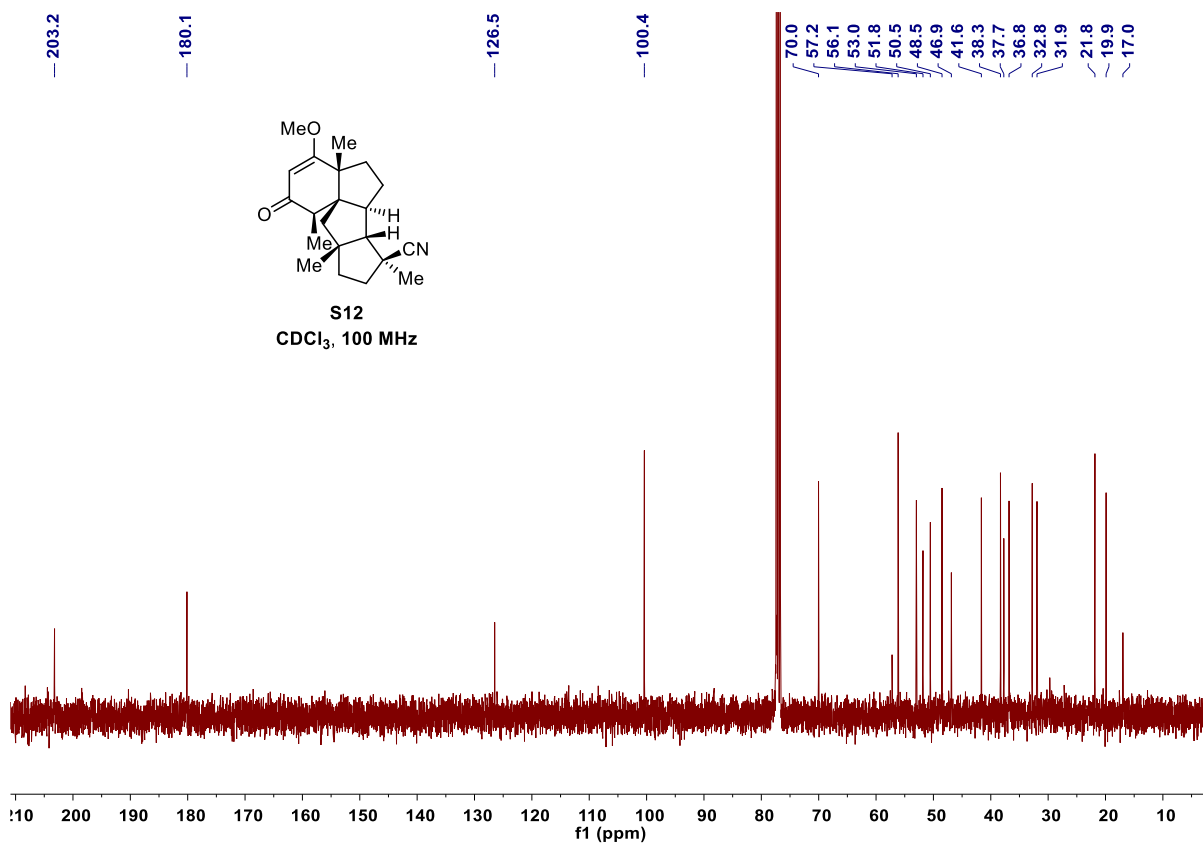

Supplementary Fig. S34. <sup>1</sup>H and <sup>13</sup>C NMR Spectra of S12

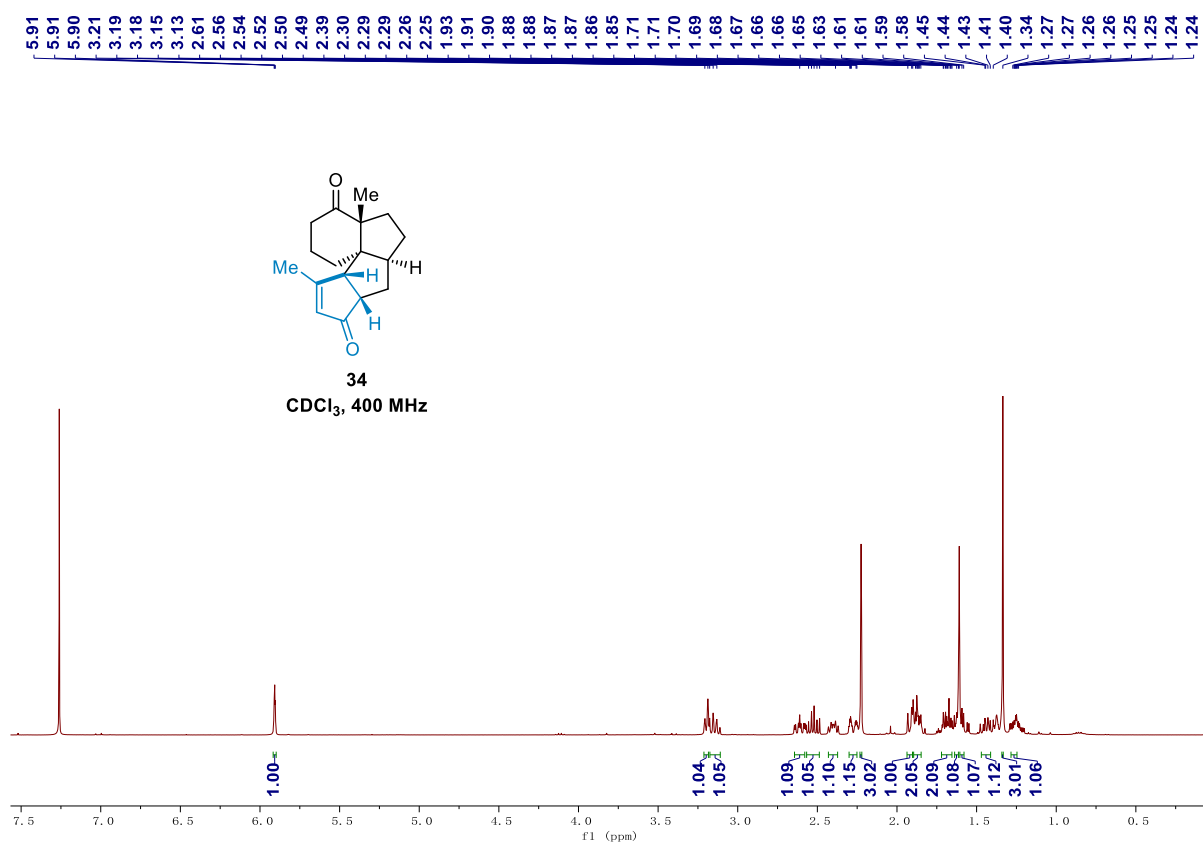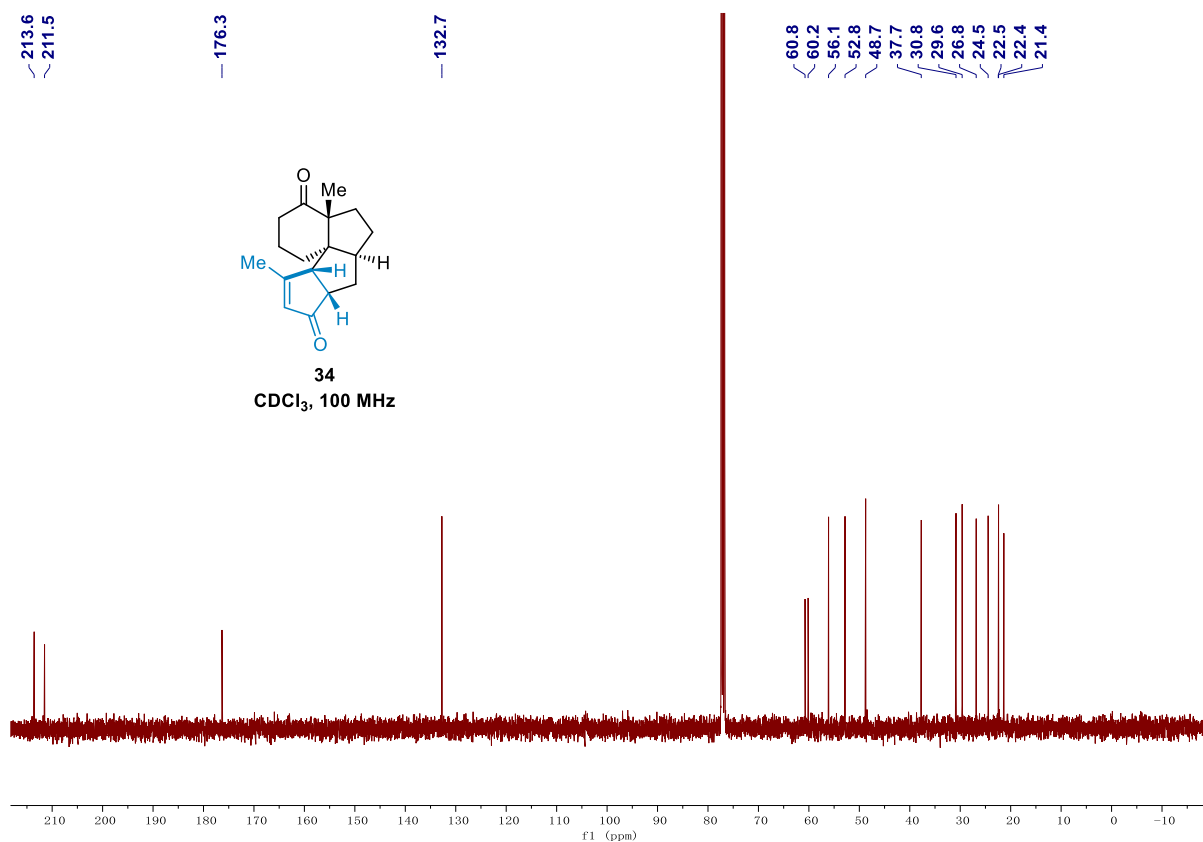

Supplementary Fig. S35. <sup>1</sup>H and <sup>13</sup>C NMR Spectra of 34

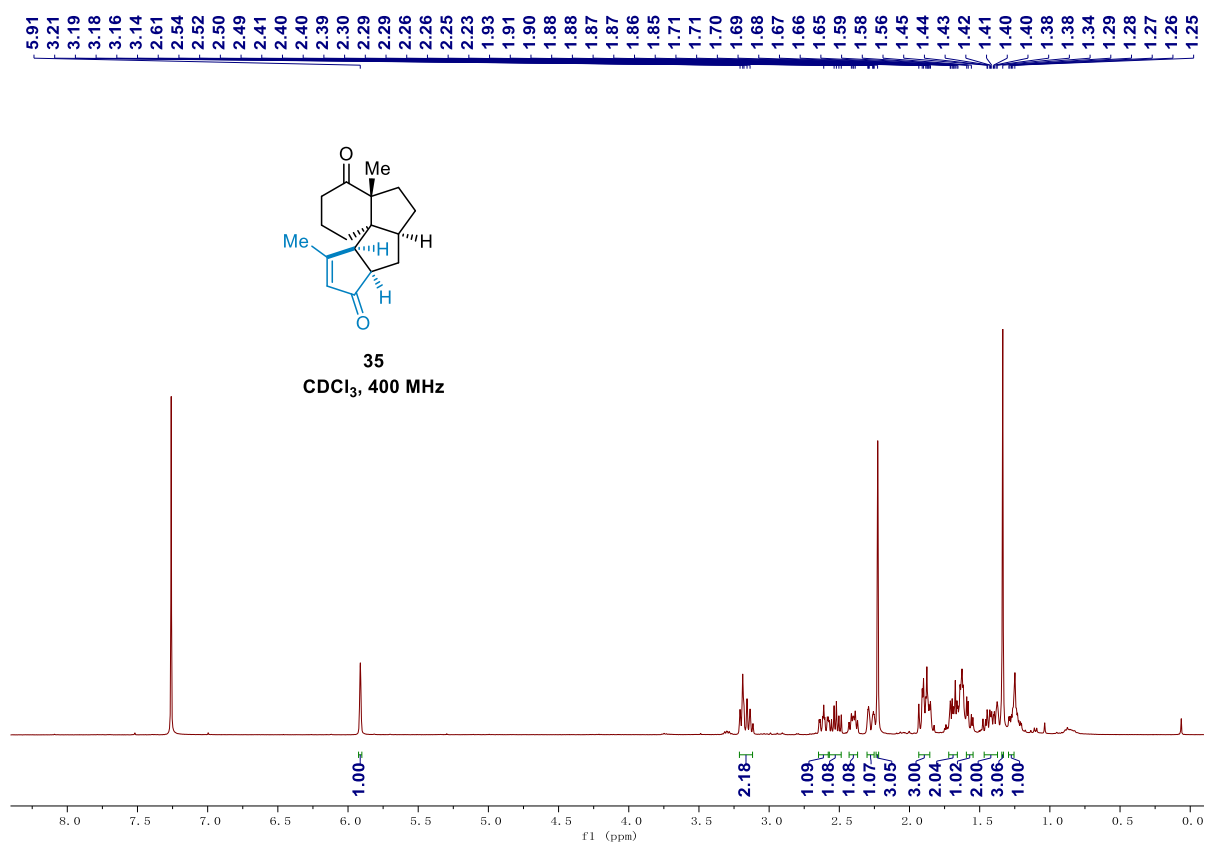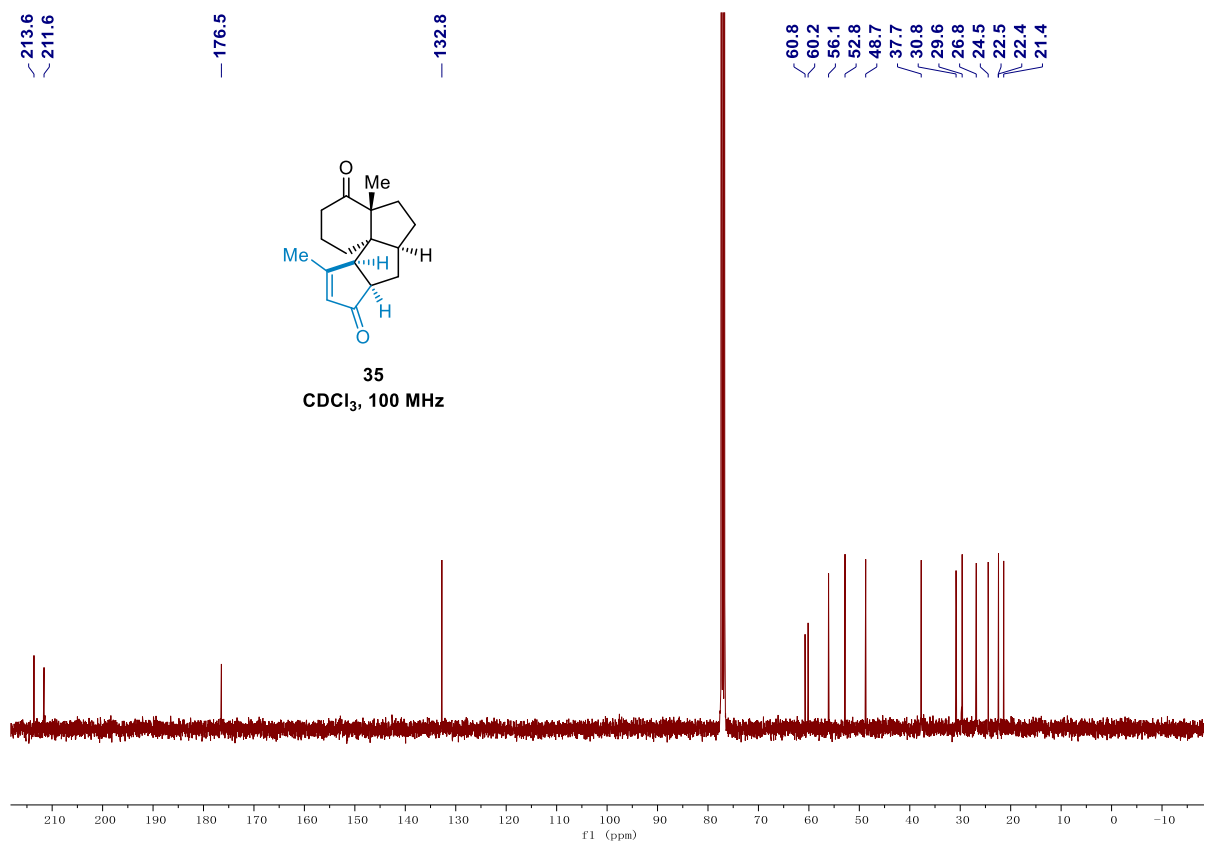

Supplementary Fig. S36. <sup>1</sup>H and <sup>13</sup>C NMR Spectra of 35

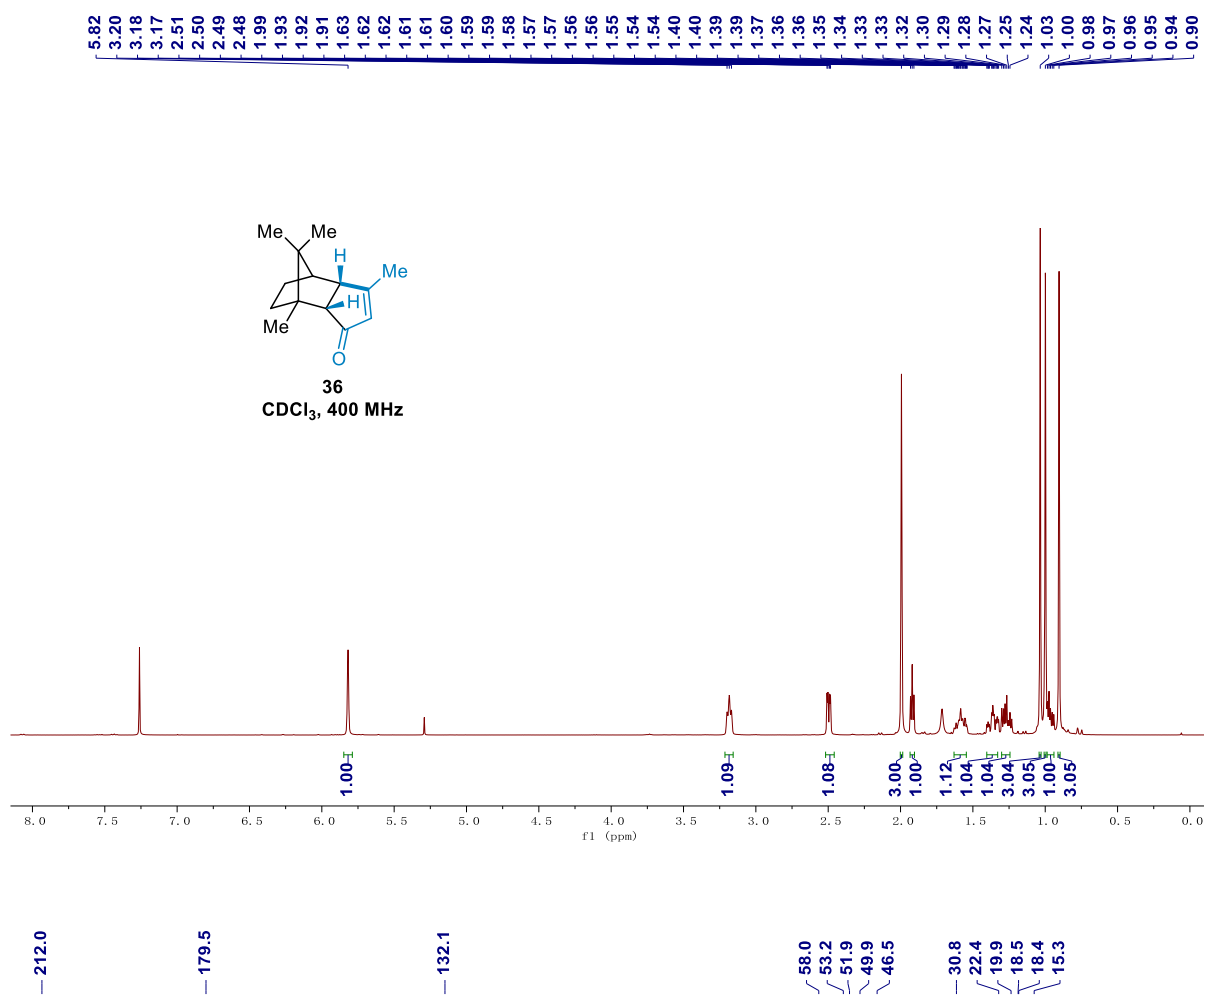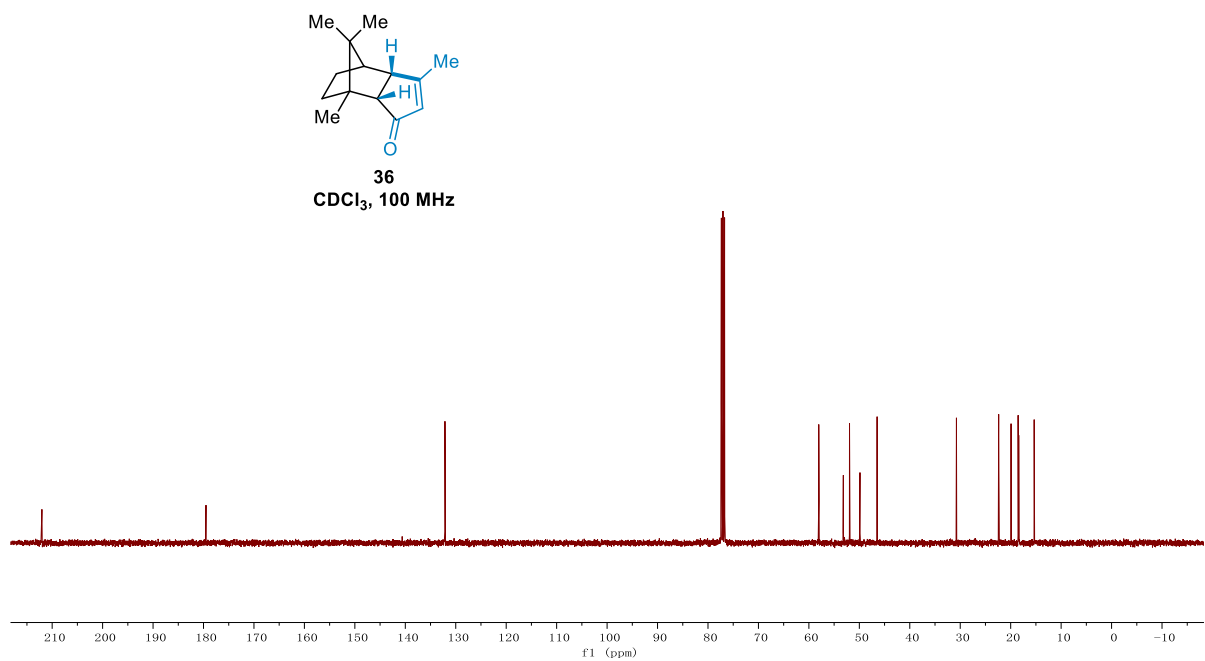

Supplementary Fig. S37. <sup>1</sup>H and <sup>13</sup>C NMR Spectra of 36

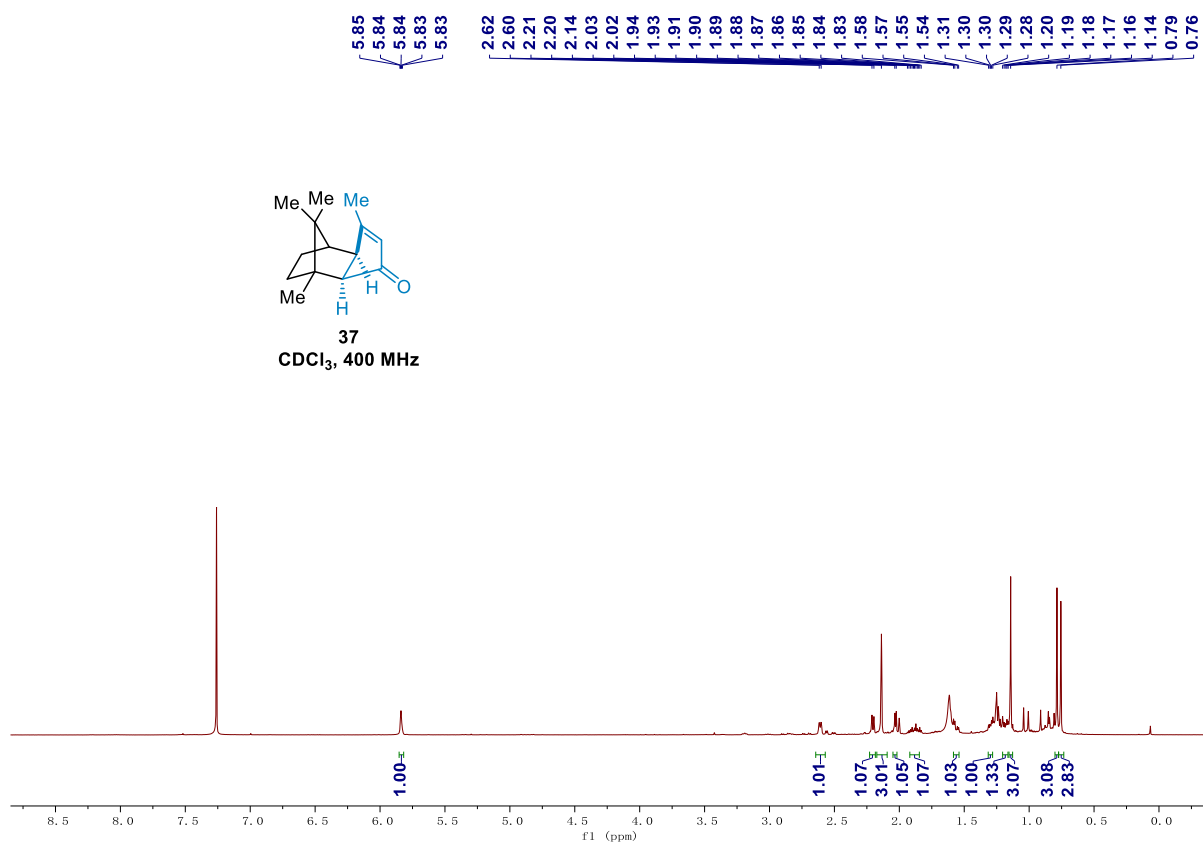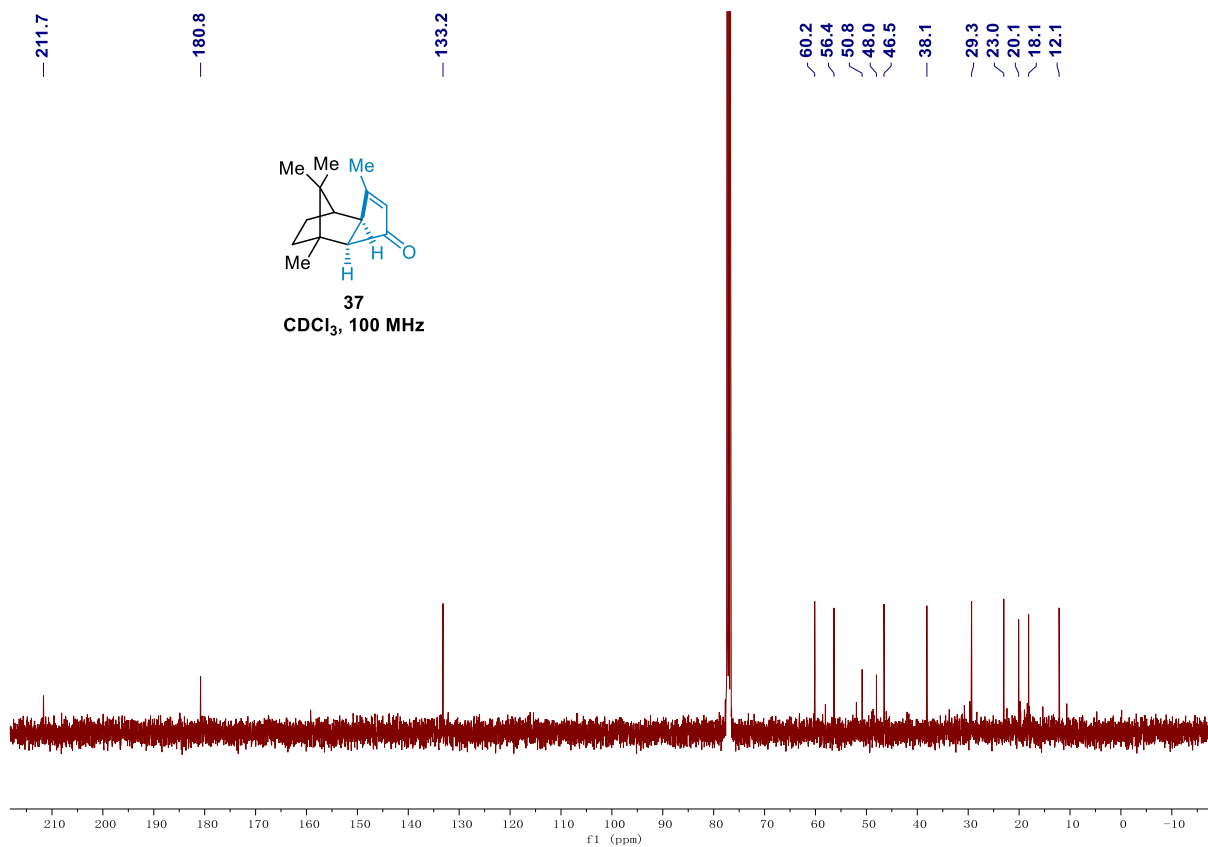

Supplementary Fig. S38.  $^1\text{H}$  and  $^{13}\text{C}$  NMR Spectra of 37

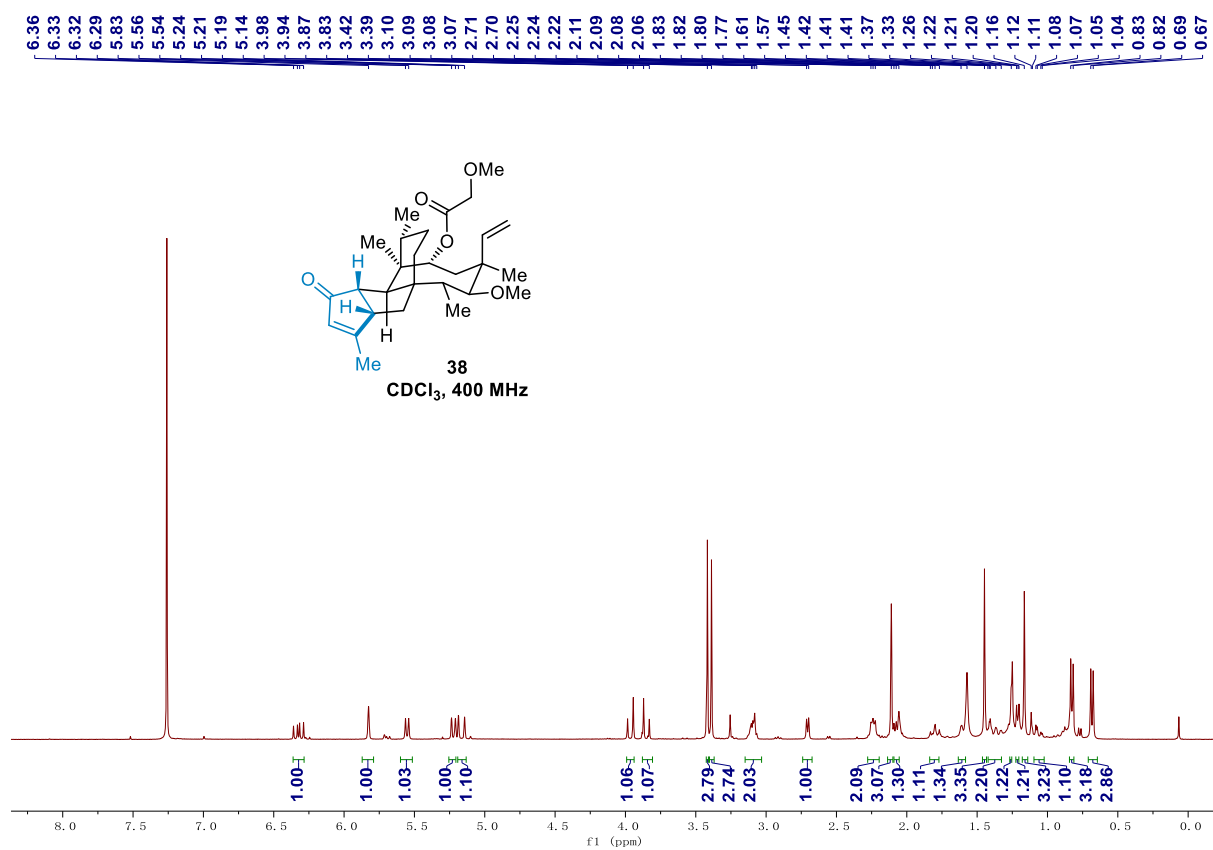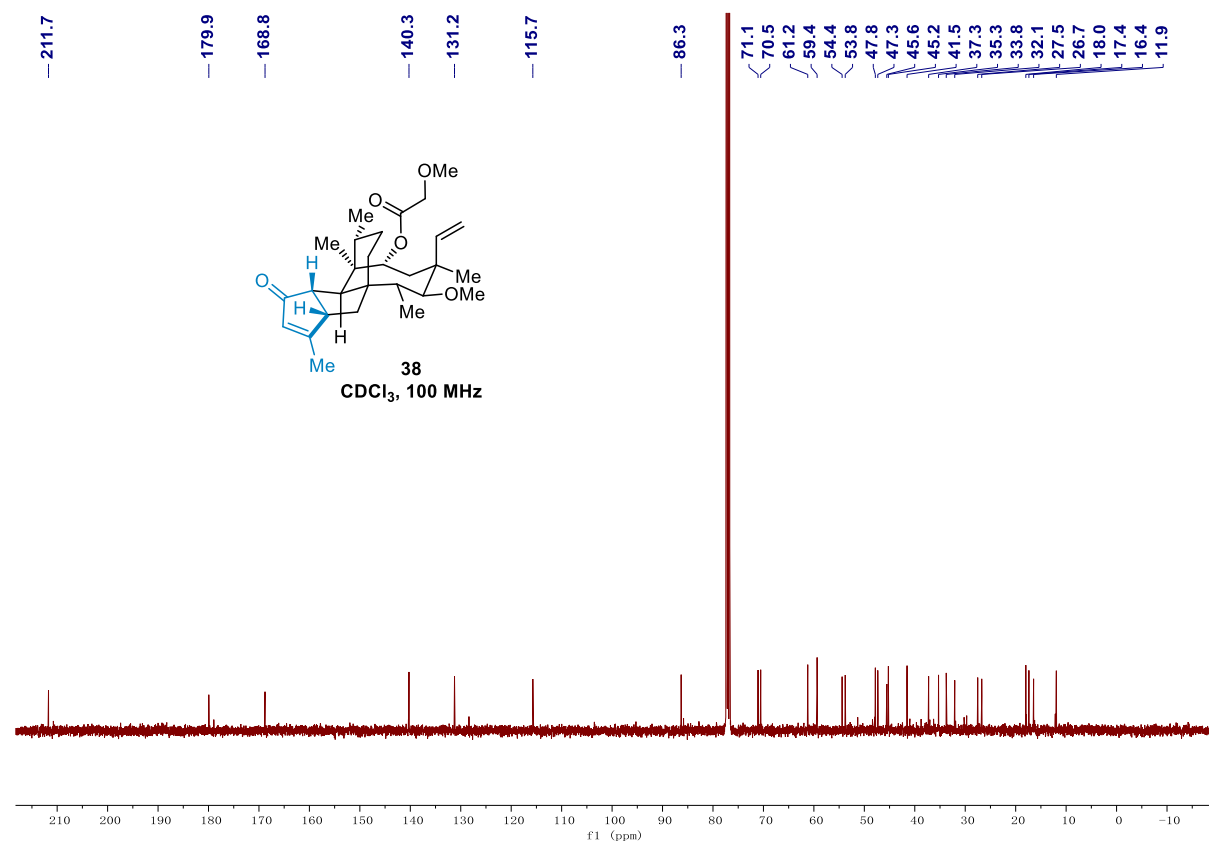

Supplementary Fig. S39. <sup>1</sup>H and <sup>13</sup>C NMR Spectra of 38



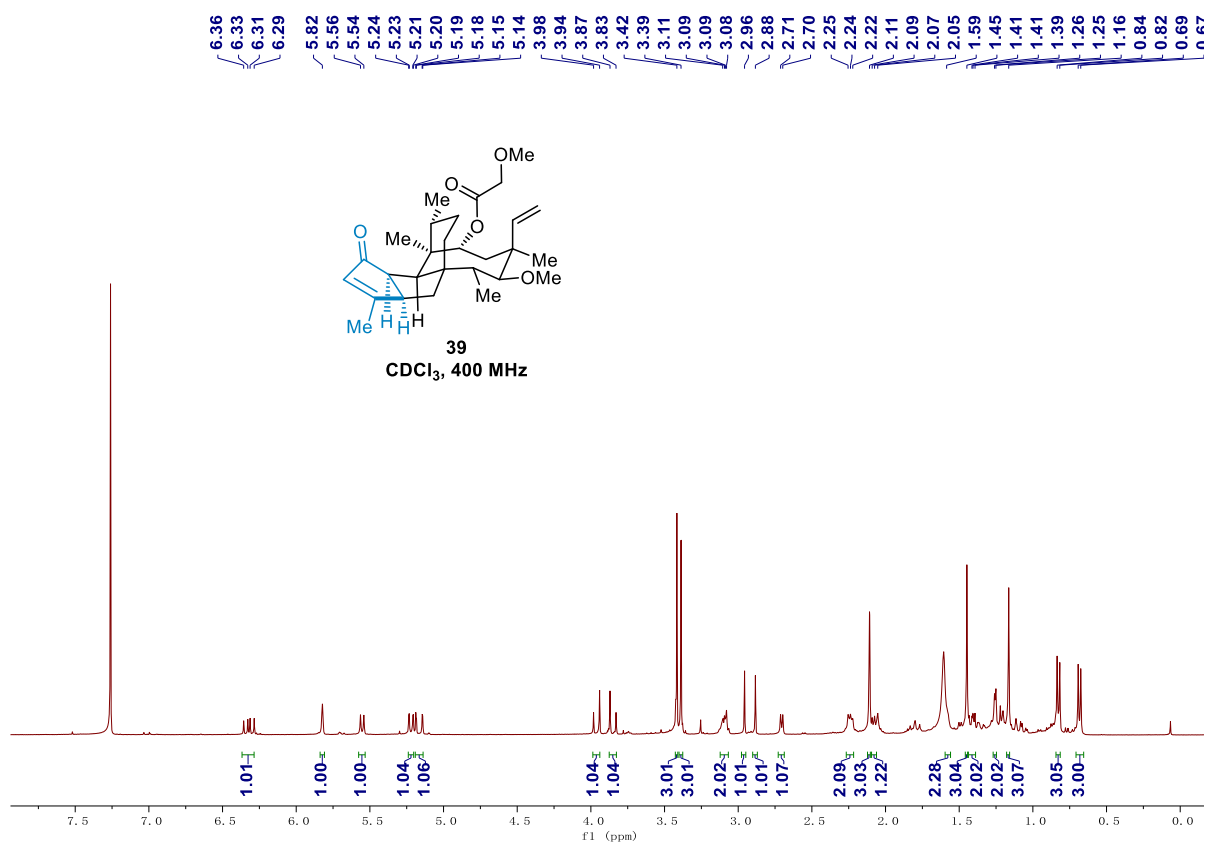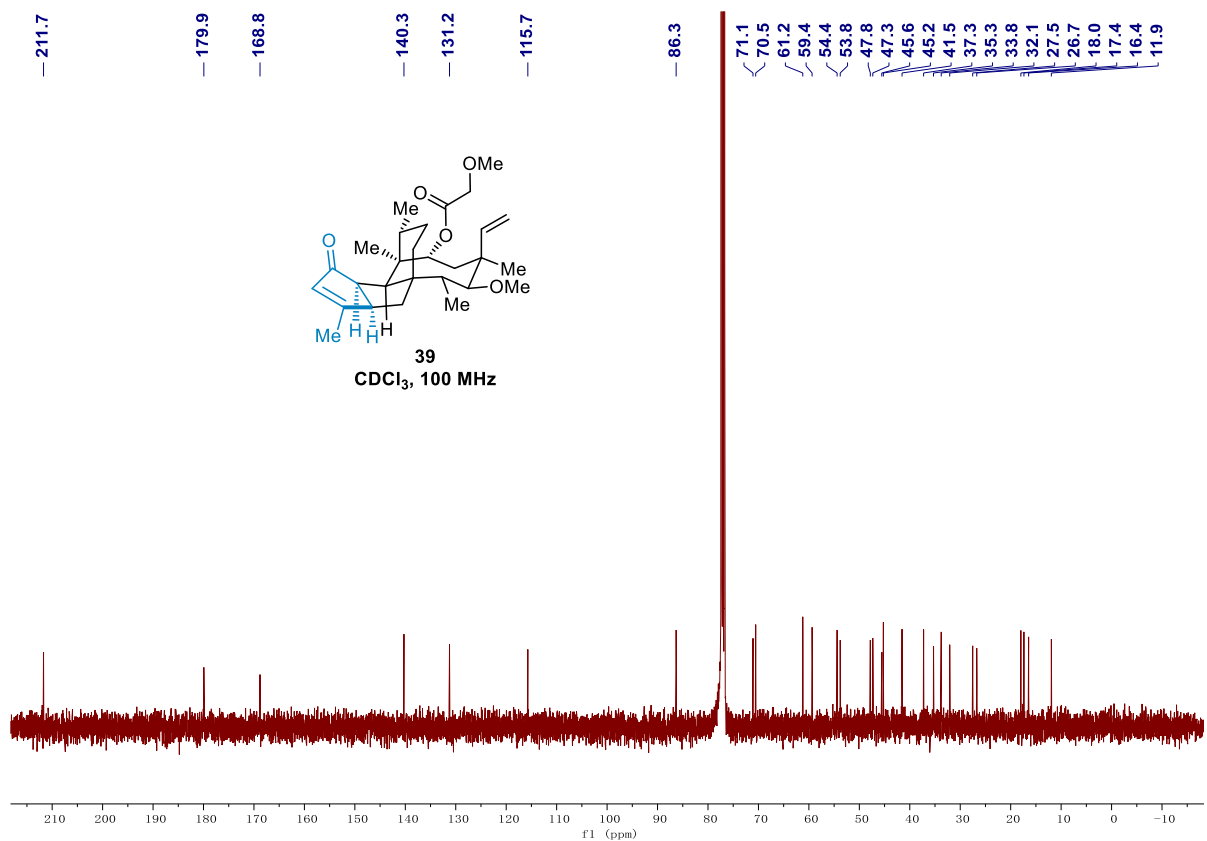

Supplementary Fig. S40.  $^1\text{H}$  and  $^{13}\text{C}$  NMR Spectra of **39**

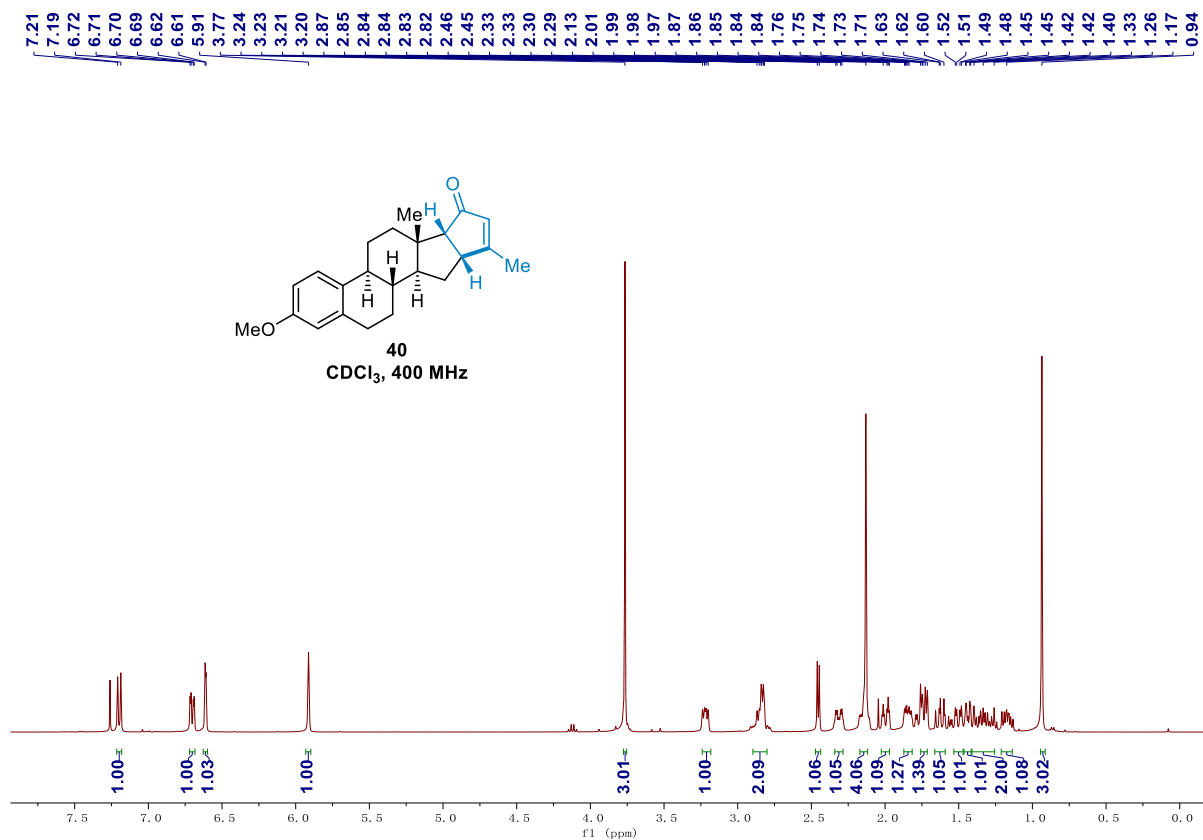

7.21  
7.19  
6.72  
6.71  
6.70  
6.69  
6.62  
6.61  
5.91  
3.77  
3.24  
3.23  
3.21  
3.20  
2.87  
2.85  
2.84  
2.84  
2.83  
2.82  
2.46  
2.45  
2.33  
2.33  
2.30  
2.29  
2.13  
2.01  
1.99  
1.98  
1.97  
1.87  
1.86  
1.85  
1.84  
1.84  
1.76  
1.75  
1.74  
1.73  
1.71  
1.63  
1.62  
1.60  
1.52  
1.51  
1.49  
1.48  
1.45  
1.45  
1.42  
1.42  
1.40  
1.40  
1.33  
1.26  
1.17  
0.94

209.8  
179.8  
157.5  
137.7  
132.6  
132.4  
126.4  
113.8  
111.4  
62.0  
55.2  
48.3  
48.2  
43.4  
43.2  
38.4  
34.2  
29.8  
28.2  
28.0  
26.3  
20.8  
18.2

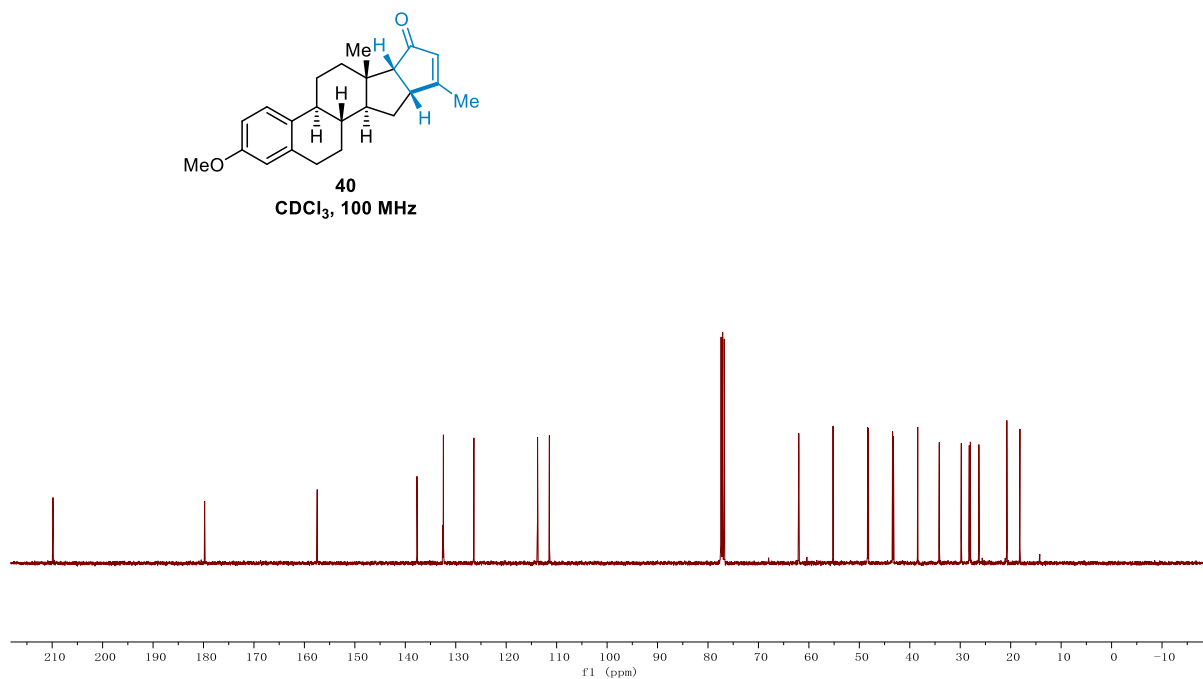

Supplementary Fig. S41. <sup>1</sup>H and <sup>13</sup>C NMR Spectra of 40

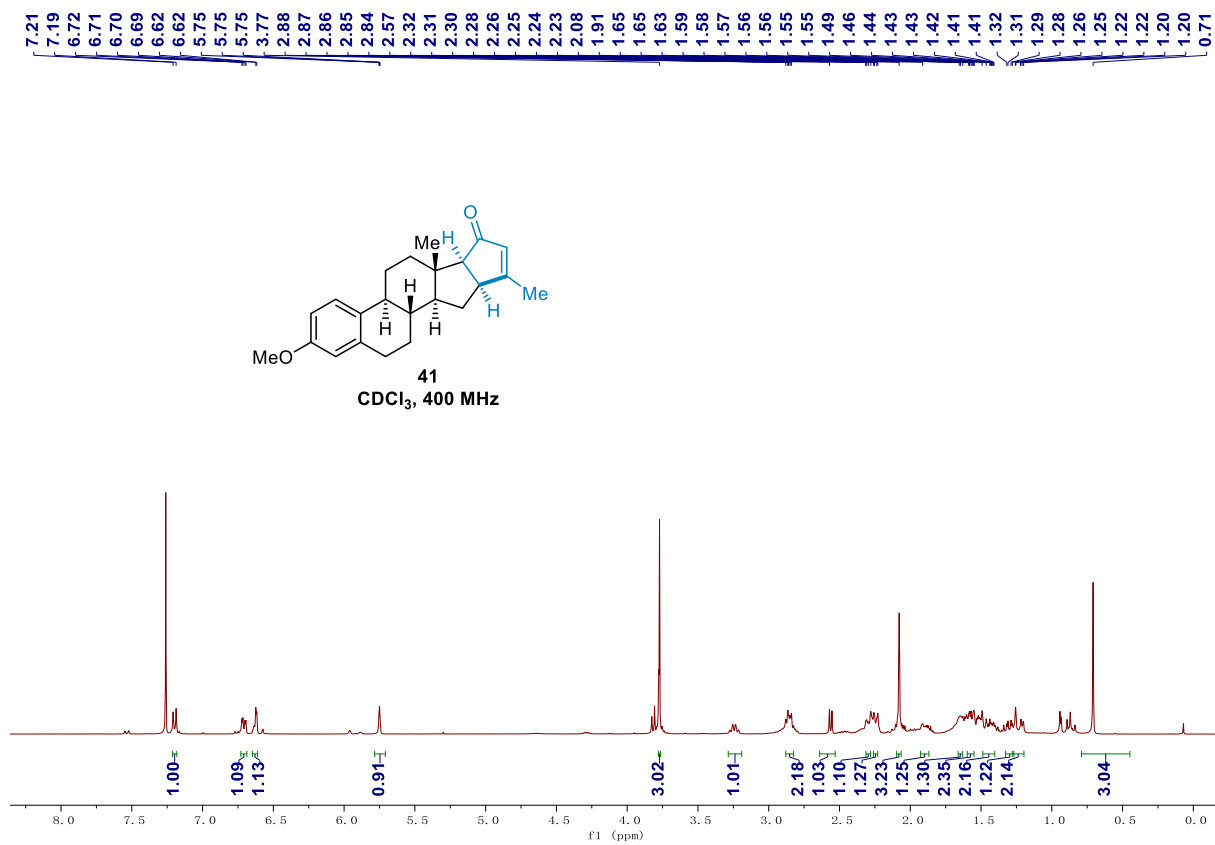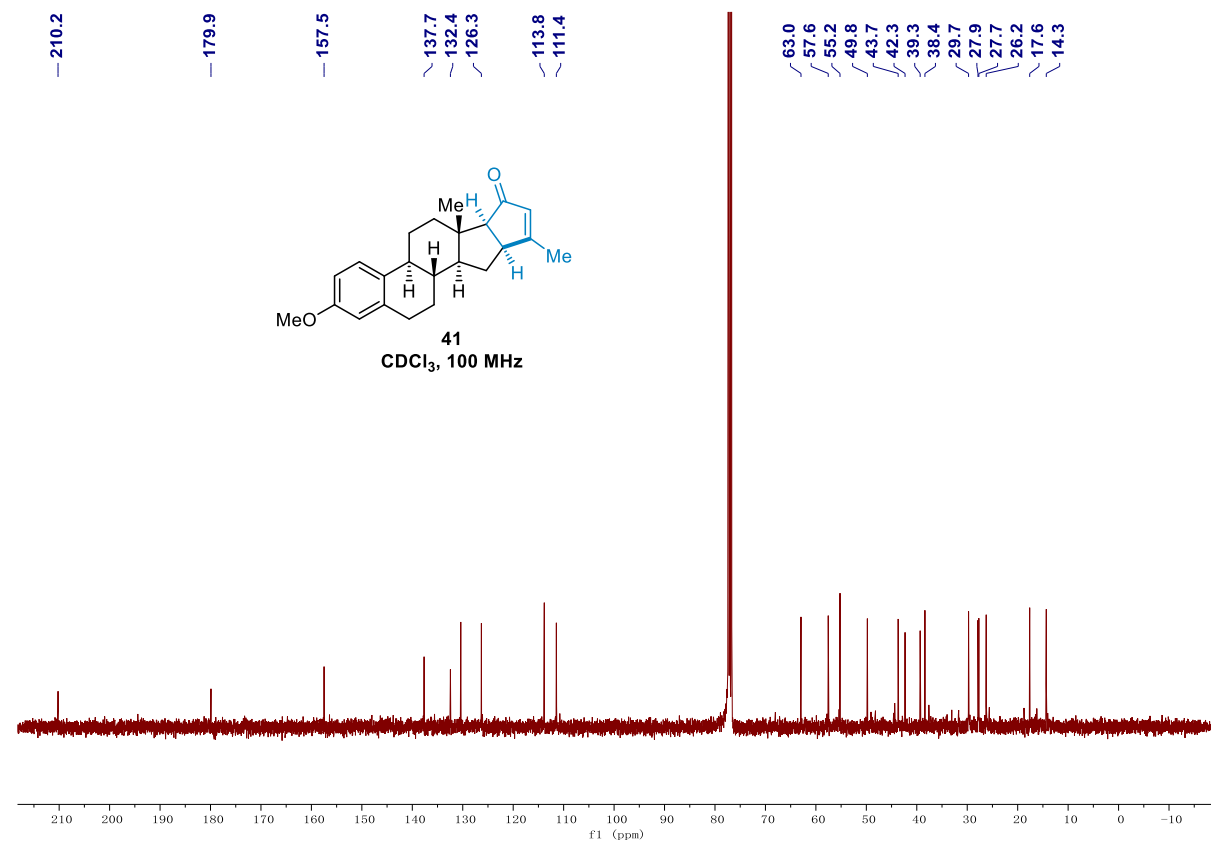

Supplementary Fig. S42. <sup>1</sup>H and <sup>13</sup>C NMR Spectra of 41

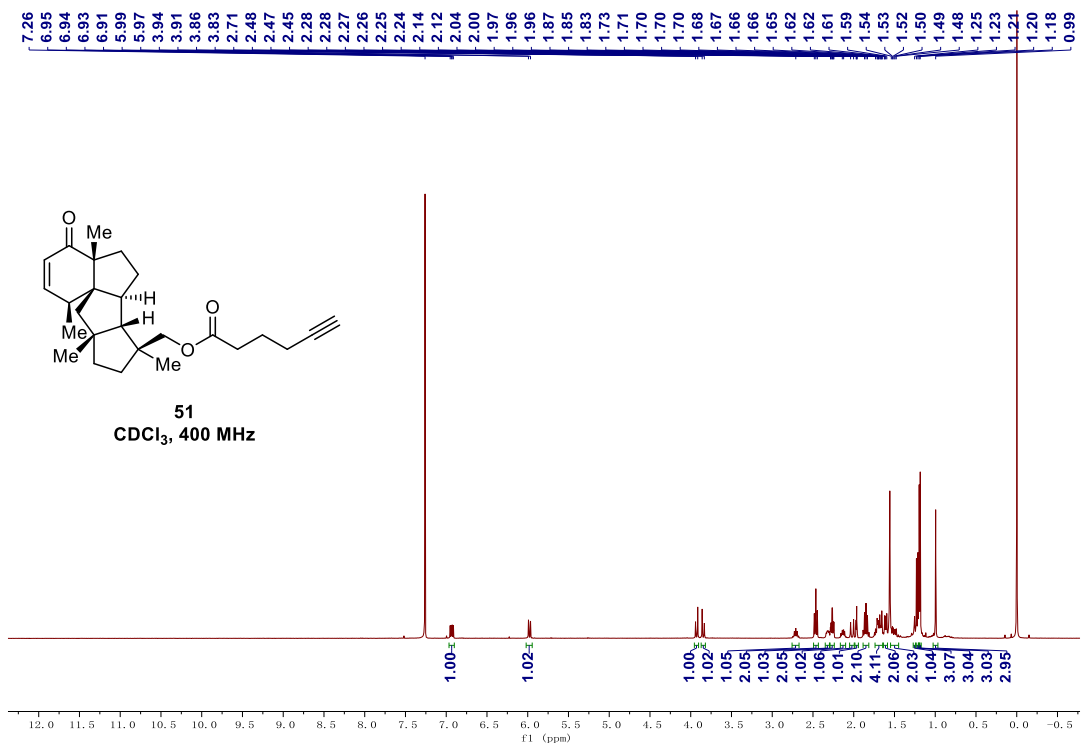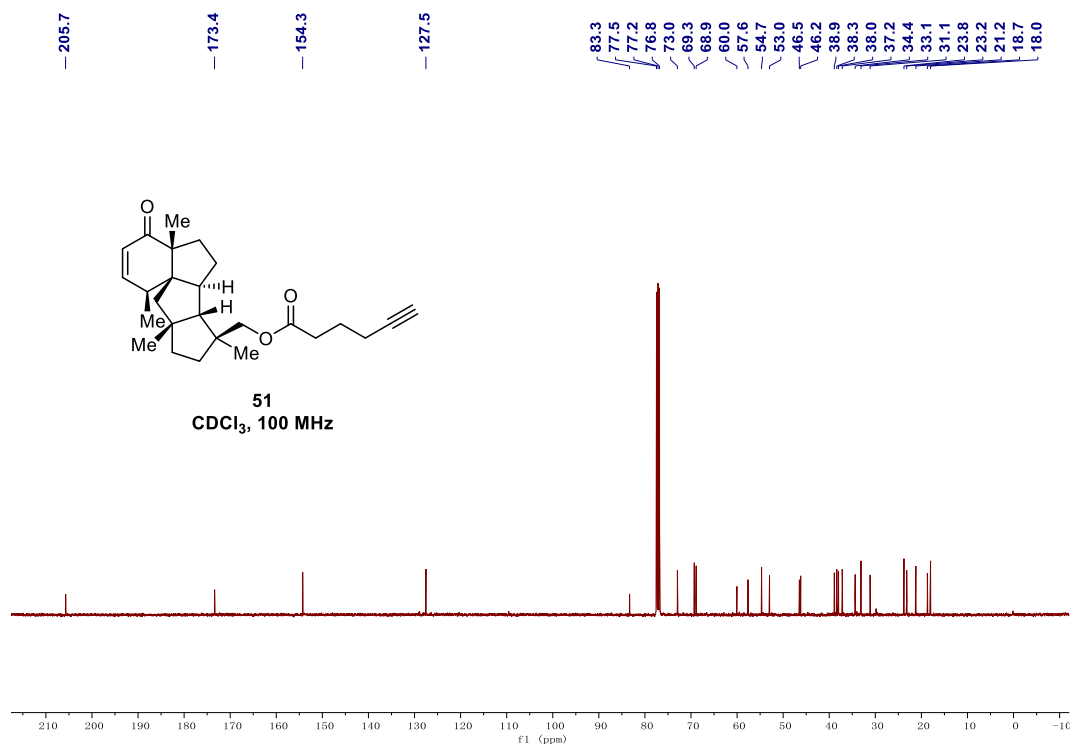

Supplementary Fig. S43. <sup>1</sup>H and <sup>13</sup>C NMR Spectra of **51**

## 8. References

- [1] Li, F.-L., Sun, W.-G., Zhang, S.-T., Gao, W.-X., Lin, S., Yang, B.-Y., Chai, C.-W., Li, H.-Q., Wang, J.-P., Hu, Z.-X. & Zhang, Y.-H. New Cyclopiane Diterpenes with Anti-inflammatory Activity from the Sea Sediment-Derived Fungus *Penicillium sp.* TJ403-2. *Chin. Chem. Lett.* **31**, 197–201 (2020).
- [2] Du, L., Li, D.-H., Zhu, T.-J., Cai, S.-X., Wang, F.-P., Xiao, X. & Gu, Q.-Q. New Alkaloids and Diterpenes from a Deep Ocean Sediment Derived Fungus *Penicillium sp.* *Tetrahedron* **65**, 1033–1039 (2009).
- [3] Hu, P.-F., Chi, H.-M., DeBacker, K. C., Gong, X., Keim, J. H., Hsu, I. T. & Snyder, S. A. Quaternary-Centre-Guided Synthesis of Complex Polycyclic Terpenes. *Nature* **569**, 703–707 (2019).
- [4] Niu, S.-W., Fan, Z.-W., Tang, X.-X., Liu, Q.-M., Shao, Z.-Z., Liu, G.-M. & Yang, X.-W. Cyclopiane-type Diterpenes from The Deep-Sea-Derived Fungus *Penicillium commune* MCCC 3A00940. *Tetrahedron Lett.* **59**, 375–378 (2018).
- [5] Ling, T.; Chowdhury, C.; Kramer, B.; Vong, B. G.; Palladino, M. A.; Theodorakis, E. A. Enantioselective Synthesis of the Antiinflammatory Agent (–)-Acanthoic Acid. *J. Org. Chem.* **66**, 8843–8853 (2001).
