# Supplementary material for: Total synthesis and target identification of marine cyclopiane diterpenes
Source: PubMed Central journal article supplement — Nat Commun. 2024 Dec 30;15:10851. doi: 10.1038/s41467-024-55189-8 (PMC11686375; doi:10.1038/s41467-024-55189-8), 2024-12-30
Supplement: 41467_2024_55189_MOESM2_ESM.pdf [file 41467_2024_55189_MOESM2_ESM.pdf]

## **Description of Additional Supplementary Files**

File name: **Supplementary Data 1**

Description: List of primers used in this study.

File name: **Supplementary Data 2**

Description: LC-MS/MS data of chemo-proteomic profiling related to Fig. 4H and Fig. 4G.

File name: **Supplementary Data 3**

Description: LC-MS/MS data of binding site identification related to Fig. 4J-L.
